# Supplementary material for: Cohesin organizes 3D DNA contacts surrounding active enhancers in C. elegans
Source: HighWire-hosted journal article supplement (doi:10.1101/gr.279365.124), 2025-04-10
Supplement: Supplemental_File1.xlsx [file Supplemental_File1.xlsx]

## Sheet: Readme
Strains:	genotypes of the newly generated strains and allele sequences are provided.
ChIP Data:	The list of data sets uploaded to the GEO (Gene Expression Omnibus under GSE237663) are provided
ChIP_stats:	The statistics from Bowtie 2 are provided.
HiC_data:	The list of data sets uploaded to the GEO (Gene Expression Omnibus under GSE237663) are provided
HiC_stats:	The statistics from Juicer pipeline are provided.
mRNA-seq:	The list of data sets uploaded to the GEO (Gene Expression Omnibus under GSE237663) are provided
Stringent-Majority Peaks:	For each peak called in the merged BAM file, we counted the number of times the peak was called in replicates. If the peak is present in more than half of the replicates, it is kept.

## Sheet: Strains
Strain name	Genotype
ERC103 (aka JK06)	syb6035[wapl-1::GGGGS::AID::emGFP] IV, ieSi57[eft-3p::TIR1::mRuby::unc-54 3'UTR + Cbr-unc-119(+)] II
ERC102 (aka JK05)	syb5520[smc-3::GGGGS::AID::emGFP] III , ieSi57[eft-3p::TIR1::mRuby::unc-54 3'UTR + Cbr-unc-119(+)] II
ERC107 (aka HW04)	syb8826[scc-2::GGGGS::AID], ieSi57[eft-3p::TIR1::mRuby::unc-54 3'UTR + Cbr-unc-119(+)] II
SUNY Biotech generated allele strain names and inserted sequences
PHX6035 wapl-1(syb6035) sequence
CGAGGATGGTGTCAGGAAAGACGGACGGCTTGATCGGAATAAAATGGACAGAATGGATCAAGTGGATGTAGTTCATGCTCTTCAACAAGTCATGAACAAAGCCTCGGCTCATATGGAAGGCAGTGTAATCGCTTCTTACCACGCTCTTCTCGTCGGATTCGTTCTCCAACAGAACGAGGATCATCTCGACGAGGTTCGGAAGCACCTGCCTGGCAAAAACTTCCAAAATATGATATCGCAATTGAAGCGGTTGTACGATTTCACGAAAGCTACGATGgtaggagtctgagttattttgaattttcaatacataaaagtgatttttcagGCGAAGCGGGTCGAATCAAATAGTGGATTCAGAGCTATCGAGCGTGTGATTGAGTACTTAGAGCGGCTCGA…
PHX5520 smc-3(syb5520) sequence
GATTTTGTTGAGGATGACACGACTCATGGAGGGGGAGGAGGATCGATGCCTAAAGATCCAGCCAAACCTCCGGCCAAGGCACAAGTTGTGGGATGGCCACCGGTGAGATCATACCGGAAGAACGTGATGGTTTCCTGCCAAAAATCAAGCGGTGGCCCGGAGGCGGCGGCGTTCGTGAAGGTTTCTAAAGGAGAAGAACTTTTCACAGGAGTTGTTCCAATACTTGTTGAACTTGATGGAGATGTAAATGGACATAAGTTCTCTGTTTCTGGCGAAGGAGAAGGAGATGCTACTTATGGAAAACTTACTCTCAAGTTCATTTGCACTACTGGAAAACTTCCCGTTCCATGGCCAACTCTTGTTACTACTTTgACTTATGGAGTTCAATGTTTCGCTCGT…
PHX8826 scc-2(syb8826) sequence
GGGGTTCTTTCCAGCATACAGCGTTTTTGGCTGAAAAGATTTGCTCGgttcgtttttttgtagtttgcagcgccaaaatatatttataaacatttaaaaaattatgattttgctgatttctttttggaaagcataggaatgaagcttctaatgtaatttgaaaataaacgaattgaaaaaaaggtctagttttgaagaaaaactgtaatcaacagaccatttttgaagagattgggtctgctaggccacaaactacaatttccgatttagcagacccatgtgttttgtagagattgggtctgctagactacaaactacaatttccgatttagcagacccatgtgttttgtagagattgggtctgctagactacaaactacaaaggtatcaacaaaaaat…

## Sheet: ChIP_data
	library ID	reps	strain	stage	treatment	target	antibody	matching input ID	raw file	processed file	processed file	processed file
SMC1_JK05_1hrauxin_L3_rep1	JK157b	rep1	JK05	L3	1hrauxin	SMC1	Q4467	JK169	JK157b.fastq.gz	SMC1_JK05_1hrauxin_inputsubt_avg.bw	SMC1_JK05_1hrauxin_avg_chip_peaks.bed	SMC1_JK05_1hrauxin_avg_chip_summits.bed
SMC1_JK05_1hrauxin_L3_rep2	JK158b	rep2	JK05	L3	1hrauxin	SMC1	Q4467	JK170	JK158b.fastq.gz	SMC1_JK05_1hrauxin_inputsubt_avg.bw	SMC1_JK05_1hrauxin_avg_chip_peaks.bed	SMC1_JK05_1hrauxin_avg_chip_summits.bed
SMC1_CA1200_1hrauxin_L3_rep1	JK159b	rep1	CA1200	L3	1hrauxin	SMC1	Q4467	JK171	JK159b.fastq.gz	SMC1_CA1200_1hrauxin_inputsubt_avg.bw	SMC1_CA1200_1hrauxin_avg_chip_peaks.bed	SMC1_CA1200_1hrauxin_avg_chip_summits.bed
SMC1_CA1200_1hrauxin_L3_rep2	JK160b	rep2	CA1200	L3	1hrauxin	SMC1	Q4467	JK172	JK160b.fastq.gz	SMC1_CA1200_1hrauxin_inputsubt_avg.bw	SMC1_CA1200_1hrauxin_avg_chip_peaks.bed	SMC1_CA1200_1hrauxin_avg_chip_summits.bed
SMC1_JK06_1hrauxin_L3_rep1	JK161b	rep1	JK06	L3	1hrauxin	SMC1	Q4467	JK140	JK161b.fastq.gz	SMC1_JK06_1hrauxin_inputsubt_avg.bw	SMC1_JK06_1hrauxin_avg_chip_peaks.bed	SMC1_JK06_1hrauxin_avg_chip_summits.bed
SMC1_JK06_1hrauxin_L3_rep2	JK184b	rep2	JK06	L3	1hrauxin	SMC1	Q4467	JK186	JK184b.fastq.gz	SMC1_JK06_1hrauxin_inputsubt_avg.bw	SMC1_JK06_1hrauxin_avg_chip_peaks.bed	SMC1_JK06_1hrauxin_avg_chip_summits.bed
SMC3_JK05_1hrauxin_L3_rep1	JK163	rep1	JK05	L3	1hrauxin	SMC3	Q4469	JK169	JK163.fastq.gz	SMC3_JK05_1hrauxin_inputsubt_avg.bw	SMC3_JK05_1hrauxin_avg_chip_peaks.bed	SMC3_JK05_1hrauxin_avg_chip_summits.bed
SMC3_JK05_1hrauxin_L3_rep2	JK164	rep2	JK05	L3	1hrauxin	SMC3	Q4469	JK170	JK164.fastq.gz	SMC3_JK05_1hrauxin_inputsubt_avg.bw	SMC3_JK05_1hrauxin_avg_chip_peaks.bed	SMC3_JK05_1hrauxin_avg_chip_summits.bed
SMC3_CA1200_1hrauxin_L3_rep1	JK165	rep1	CA1200	L3	1hrauxin	SMC3	Q4469	JK171	JK165.fastq.gz	SMC3_CA1200_1hrauxin_inputsubt_avg.bw	SMC3_CA1200_1hrauxin_avg_chip_peaks.bed	SMC3_CA1200_1hrauxin_avg_chip_summits.bed
SMC3_CA1200_1hrauxin_L3_rep2	JK166	rep2	CA1200	L3	1hrauxin	SMC3	Q4469	JK172	JK166.fastq.gz	SMC3_CA1200_1hrauxin_inputsubt_avg.bw	SMC3_CA1200_1hrauxin_avg_chip_peaks.bed	SMC3_CA1200_1hrauxin_avg_chip_summits.bed
SMC3_JK06_1hrauxin_L3_rep1	JK167	rep1	JK06	L3	1hrauxin	SMC3	Q4469	JK140	JK167.fastq.gz	SMC3_JK06_1hrauxin_inputsubt_avg.bw	SMC3_JK06_1hrauxin_avg_chip_peaks.bed	SMC3_JK06_1hrauxin_avg_chip_summits.bed
SMC3_JK06_1hrauxin_L3_rep2	JK185	rep2	JK06	L3	1hrauxin	SMC3	Q4469	JK186	JK185.fastq.gz	SMC3_JK06_1hrauxin_inputsubt_avg.bw	SMC3_JK06_1hrauxin_avg_chip_peaks.bed	SMC3_JK06_1hrauxin_avg_chip_summits.bed
input_JK05_1hrauxin_L3_rep1	JK169	rep1	JK05	L3	1hrauxin	input			JK169.fastq.gz
input_JK05_1hrauxin_L3_rep2	JK170	rep2	JK05	L3	1hrauxin	input			JK170.fastq.gz
input_CA1200_1hrauxin_L3_rep1	JK171	rep1	CA1200	L3	1hrauxin	input			JK171.fastq.gz
input_CA1200_1hrauxin_L3_rep2	JK172	rep2	CA1200	L3	1hrauxin	input			JK172.fastq.gz
input_JK06_1hrauxin_L3_rep1	JK140	rep1	JK06	L3	1hrauxin	input			JK140.fastq.gz
input_JK06_1hrauxin_L3_rep2	JK186	rep2	JK06	L3	1hrauxin	input			JK186.fastq.gz
GFP_JK05_noauxin_L3_rep1	JK129	rep1	JK05	L3	noauxin	GFP	ab290	JK125	JK129.fastq.gz	smc3GFP_JK05_noauxin_inputsubt_avg.bw	smc3GFP_JK05_noauxin_avg_chip_peaks.bed	smc3GFP_JK05_noauxin_avg_chip_summits.bed
GFP_JK05_1hrauxin_L3_rep1	JK130	rep1	JK05	L3	1hrauxin	GFP	ab290	JK126	JK130.fastq.gz	smc3GFP_JK05_1hrauxin_inputsubt_avg.bw	smc3GFP_JK05_1hrauxin_avg_chip_peaks.bed	smc3GFP_JK05_1hrauxin_avg_chip_summits.bed
GFP_JK05_noauxin_L3_rep2	JK131	rep2	JK05	L3	noauxin	GFP	ab290	JK127	JK131.fastq.gz	smc3GFP_JK05_noauxin_inputsubt_avg.bw	smc3GFP_JK05_noauxin_avg_chip_peaks.bed	smc3GFP_JK05_noauxin_avg_chip_summits.bed
GFP_JK05_1hrauxin_L3_rep2	JK132	rep2	JK05	L3	1hrauxin	GFP	ab290	JK128	JK132.fastq.gz	smc3GFP_JK05_1hrauxin_inputsubt_avg.bw	smc3GFP_JK05_1hrauxin_avg_chip_peaks.bed	smc3GFP_JK05_1hrauxin_avg_chip_summits.bed
input_JK05_noauxin_L3_rep1	JK125	rep1	JK05	L3	noauxin	input			JK125.fastq.gz
input_JK05_1hrauxin_L3_rep1	JK126	rep1	JK05	L3	1hrauxin	input			JK126.fastq.gz
input_JK05_noauxin_L3_rep2	JK127	rep2	JK05	L3	noauxin	input			JK127.fastq.gz
input_JK05_1hrauxin_L3_rep2	JK128	rep2	JK05	L3	1hrauxin	input			JK128.fastq.gz
GFP_JK06_noauxin_L3_rep1	JK147	rep1	JK06	L3	noauxin	GFP	ab290	JK137	JK147.fastq.gz	waplGFP_JK06_noauxin_inputsubt_avg.bw	waplGFP_JK06_noauxin_avg_chip_peaks.bed	waplGFP_JK06_noauxin_avg_chip_summits.bed
GFP_JK06_1hrauxin_L3_rep1	JK148	rep1	JK06	L3	1hrauxin	GFP	ab290	JK138	JK148.fastq.gz	waplGFP_JK06_1hrauxin_inputsubt_avg.bw	waplGFP_JK06_1hrauxin_avg_chip_peaks.bed	waplGFP_JK06_1hrauxin_avg_chip_summits.bed
GFP_JK06_noauxin_L3_rep2	JK149	rep2	JK06	L3	noauxin	GFP	ab290	JK139	JK149.fastq.gz	waplGFP_JK06_noauxin_inputsubt_avg.bw	waplGFP_JK06_noauxin_avg_chip_peaks.bed	waplGFP_JK06_noauxin_avg_chip_summits.bed
GFP_JK06_1hrauxin_L3_rep2	JK150	rep2	JK06	L3	1hrauxin	GFP	ab290	JK140	JK150.fastq.gz	waplGFP_JK06_1hrauxin_inputsubt_avg.bw	waplGFP_JK06_1hrauxin_avg_chip_peaks.bed	waplGFP_JK06_1hrauxin_avg_chip_summits.bed
input_JK06_noauxin_L3_rep1	JK137	rep1	JK06	L3	noauxin	input			JK137.fastq.gz
input_JK06_1hrauxin_L3_rep1	JK138	rep1	JK06	L3	1hrauxin	input			JK138.fastq.gz
input_JK06_noauxin_L3_rep2	JK139	rep2	JK06	L3	noauxin	input			JK139.fastq.gz
PQN85_CA1200_1hrauxin_L3_rep1	HW01	rep1	CA1200	L3	1hrauxin	PQN85	Q4481	HW07	HW01.fastq.gz	PQN85_CA1200_1hrauxin_inputsubt_avg.bw	PQN85_CA1200_1hrauxin_avg_chip_peaks.bed	PQN85_CA1200_1hrauxin_avg_chip_summits.bed
PQN85_CA1200_1hrauxin_L3_rep2	JK191	rep2	CA1200	L3	1hrauxin	PQN85	Q4481	JK171	JK191.fastq.gz	PQN85_CA1200_1hrauxin_inputsubt_avg.bw	PQN85_CA1200_1hrauxin_avg_chip_peaks.bed	PQN85_CA1200_1hrauxin_avg_chip_summits.bed
PQN85_JK05_1hrauxin_L3_rep1	JK189	rep1	JK05	L3	1hrauxin	PQN85	Q4481	JK195	JK189.fastq.gz	PQN85_JK05_1hrauxin_inputsubt_avg.bw	PQN85_JK05_1hrauxin_avg_chip_peaks.bed	PQN85_JK05_1hrauxin_avg_chip_summits.bed
PQN85_JK05_1hrauxin_L3_rep2	JK192	rep2	JK05	L3	1hrauxin	PQN85	Q4481	JK170	JK192.fastq.gz	PQN85_JK05_1hrauxin_inputsubt_avg.bw	PQN85_JK05_1hrauxin_avg_chip_peaks.bed	PQN85_JK05_1hrauxin_avg_chip_summits.bed
input_CA1200_1hrauxin_L3_rep1	HW07	rep1	CA1200	L3	1hrauxin	input			HW07.fastq.gz
input_JK05_1hrauxin_L3_rep2	JK195	rep2	JK05	L3	1hrauxin	input			JK195.fastq.gz
8WG16_CA1200_1hrauxin_L3_rep1	HW02	rep1	CA1200	L3	1hrauxin	8WG16	Millipore	HW07	HW02.fastq.gz	8WG16_CA1200_1hrauxin_inputsubt_avg.bw	8WG16_CA1200_1hrauxin_avg_chip_peaks.bed	8WG16_CA1200_1hrauxin_avg_chip_summits.bed
8WG16_CA1200_1hrauxin_L3_rep2	JK197	rep2	CA1200	L3	1hrauxin	8WG16	Millipore	JK194	JK197.fastq.gz	8WG16_CA1200_1hrauxin_inputsubt_avg.bw	8WG16_CA1200_1hrauxin_avg_chip_peaks.bed	8WG16_CA1200_1hrauxin_avg_chip_summits.bed
8WG16_JK05_1hrauxin_L3_rep1	HW04	rep1	JK05	L3	1hrauxin	8WG16	Millipore	HW08	HW04.fastq.gz	8WG16_JK05_1hrauxin_inputsubt_avg.bw	8WG16_JK05_1hrauxin_avg_chip_peaks.bed	8WG16_JK05_1hrauxin_avg_chip_summits.bed
8WG16_JK05_1hrauxin_L3_rep2	JK198	rep2	JK05	L3	1hrauxin	8WG16	Millipore	JK195	JK198.fastq.gz	8WG16_JK05_1hrauxin_inputsubt_avg.bw	8WG16_JK05_1hrauxin_avg_chip_peaks.bed	8WG16_JK05_1hrauxin_avg_chip_summits.bed
8WG16_JK05_1hrauxin_L3_rep3	JK200	rep3	JK05	L3	1hrauxin	8WG16	Millipore	JK170	JK200.fastq.gz	8WG16_JK05_1hrauxin_inputsubt_avg.bw	8WG16_JK05_1hrauxin_avg_chip_peaks.bed	8WG16_JK05_1hrauxin_avg_chip_summits.bed
8WG16_JK06_1hrauxin_L3_rep1	HW06	rep1	JK06	L3	1hrauxin	8WG16	Millipore	HW09	HW06.fastq.gz	8WG16_JK06_1hrauxin_inputsubt_avg.bw	8WG16_JK06_1hrauxin_avg_chip_peaks.bed	8WG16_JK06_1hrauxin_avg_chip_summits.bed
8WG16_JK06_1hrauxin_L3_rep2	JK199	rep2	JK06	L3	1hrauxin	8WG16	Millipore	JK196	JK199.fastq.gz	8WG16_JK06_1hrauxin_inputsubt_avg.bw	8WG16_JK06_1hrauxin_avg_chip_peaks.bed	8WG16_JK06_1hrauxin_avg_chip_summits.bed
input_CA1200_1hrauxin_L3_rep2	JK194	rep2	CA1200	L3	1hrauxin	input			JK194.fastq.gz
input_JK05_1hrauxin_L3_rep1	HW08	rep1	JK05	L3	1hrauxin	input			HW08.fastq.gz
input_JK06_1hrauxin_L3_rep1	HW09	rep1	JK06	L3	1hrauxin	input			HW09.fastq.gz
input_JK06_1hrauxin_L3_rep2	JK196	rep2	JK06	L3	1hrauxin	input			JK196.fastq.gz
SMC3_JK06_1hrauxin_L3_rep3	HW47	rep3	JK06	L3	1hrauxin	SMC3	Q4469	HW44	HW47.fastq.gz	SMC3_JK06_1hrauxin_inputsubt_rep3.bw	SMC3_JK06_1hrauxin_rep3_chip_peaks.bed
SMC3_JK06_1hrauxin_L3_rep4	HW49	rep4	JK06	L3	1hrauxin	SMC3	Q4469	HW45	HW49.fastq.gz	SMC3_JK06_1hrauxin_inputsubt_rep4.bw	SMC3_JK06_1hrauxin_rep4_chip_peaks.bed
PQN85_JK06_1hrauxin_L3_rep1	HW46	rep1	JK06	L3	1hrauxin	PQN85	Q4481	HW44	HW46.fastq.gz	PQN85_JK06_1hrauxin_inputsubt_avg.bw	PQN85_JK06_1hrauxin_avg_chip_peaks.bed	PQN85_JK06_1hrauxin_avg_chip_summits.bed
PQN85_JK06_1hrauxin_L3_rep2	HW48	rep2	JK06	L3	1hrauxin	PQN85	Q4481	HW45	HW48.fastq.gz	PQN85_JK06_1hrauxin_inputsubt_avg.bw	PQN85_JK06_1hrauxin_avg_chip_peaks.bed	PQN85_JK06_1hrauxin_avg_chip_summits.bed
input_JK06_1hrauxin_L3_rep3	HW44	rep3	JK06	L3	1hrauxin				HW44.fastq.gz	PQN85_JK06_1hrauxin_inputsubt_avg.bw	PQN85_JK06_1hrauxin_avg_chip_peaks.bed	PQN85_JK06_1hrauxin_avg_chip_summits.bed
input_JK06_1hrauxin_L3_rep4	HW45	rep4	JK06	L3	1hrauxin				HW45.fastq.gz	PQN85_JK06_1hrauxin_inputsubt_avg.bw	PQN85_JK06_1hrauxin_avg_chip_peaks.bed	PQN85_JK06_1hrauxin_avg_chip_summits.bed
SMC3_HW04_noauxin_L3_rep1	HW51	rep1	HW04	L3	noauxin	SMC3	Q4469	HW58	HW51.fastq.gz	SMC3_HW04_no_auxin_inputsubt_rep1.bw	SMC3_HW04_no_auxin_chip_peaks_rep1.bed
SMC3_HW04_noauxin_L3_rep2	HW55	rep2	HW04	L3	noauxin	SMC3	Q4469	HW59	HW55.fastq.gz	SMC3_HW04_no_auxin_inputsubt_rep2.bw	SMC3_HW04_no_auxin_chip_peaks_rep2.bed
SMC3_HW04_1hr_auxin_L3_rep1	HW61_1	rep1	HW04	L3	1hrauxin	SMC3	Q4469	HW68_1	HW61_1.fastq.gz	SMC3_HW04_1hr_auxin_inputsubt_rep1.bw	SMC3_HW04_1hr_auxin_chip_peaks_rep1.bed
SMC3_HW04_1hr_auxin_L3_rep2	HW65_1	rep2	HW04	L3	1hrauxin	SMC3	Q4469	HW69_1	HW65_1.fastq.gz	SMC3_HW04_1hr_auxin_inputsubt_rep2.bw	SMC3_HW04_1hr_auxin_chip_peaks_rep2.bed
PQN85_HW04_noauxin_L3_rep1	HW52	rep1	HW04	L3	noauxin	PQN85	Q4481	HW58	HW52.fastq.gz	PQN85_HW04_no_auxin_inputsubt_rep1.bw	PQN85_HW04_no_auxin_chip_peaks_rep1.bed
PQN85_HW04_noauxin_L3_rep2	HW56	rep2	HW04	L3	noauxin	PQN85	Q4481	HW59	HW56.fastq.gz	PQN85_HW04_no_auxin_inputsubt_rep2.bw	PQN85_HW04_no_auxin_chip_peaks_rep2.bed
PQN85_HW04_1hr_auxin_L3_rep1	HW62_1	rep1	HW04	L3	1hrauxin	PQN85	Q4481	HW68_1	HW62_1.fastq.gz	PQN85_HW04_1hr_auxin_inputsubt_rep1.bw	PQN85_HW04_1hr_auxin_chip_peaks_rep1.bed
PQN85_HW04_1hr_auxin_L3_rep2	HW66_1	rep2	HW04	L3	1hrauxin	PQN85	Q4481	HW69_1	HW66_1.fastq.gz	PQN85_HW04_1hr_auxin_inputsubt_rep2.bw	PQN85_HW04_1hr_auxin_chip_peaks_rep2.bed
H4K20me1_HW04_noauxin_L3_rep1	HW76	rep1	HW04	L3	noauxin	H4K20me1	ab9051	HW58	HW76.fastq.gz	H4K20me1_HW04_no_auxin_inputsubt_rep1.bw	H4K20me1_HW04_no_auxin_chip_peaks_rep1.bed
H4K20me1_HW04_noauxin_L3_rep2	HW77	rep2	HW04	L3	noauxin	H4K20me1	ab9051	HW59	HW77.fastq.gz	H4K20me1_HW04_no_auxin_inputsubt_rep2.bw	H4K20me1_HW04_no_auxin_chip_peaks_rep2.bed
H4K20me1_HW04_1hr_auxin_L3_rep1	HW78	rep1	HW04	L3	1hrauxin	H4K20me1	ab9051	HW68_1	HW78.fastq.gz	H4K20me1_HW04_1hr_auxin_inputsubt_rep1.bw	H4K20me1_HW04_1hr_auxin_chip_peaks_rep1.bed
H4K20me1_HW04_1hr_auxin_L3_rep2	HW79	rep2	HW04	L3	1hrauxin	H4K20me1	ab9051	HW69_1	HW79.fastq.gz	H4K20me1_HW04_1hr_auxin_inputsubt_rep2.bw	H4K20me1_HW04_1hr_auxin_chip_peaks_rep2.bed
input_HW04_noauxin_L3_rep1	HW58	rep1	HW04	L3	noauxin	input			HW58.fastq.gz
input_HW04_noauxin_L3_rep2	HW59	rep2	HW04	L3	noauxin	input			HW59.fastq.gz
input_HW04_1hr_auxin_L3_rep1	HW68_1	rep1	HW04	L3	1hrauxin	input			HW68_1.fastq.gz
input_HW04_1hr_auxin_L3_rep2_1	HW69_1	rep2	HW04	L3	1hrauxin	input			HW69_1.fastq.gz

## Sheet: ChIP_stats
JK157b
4052356 reads
4052356 (100.00%) were unpaired
452140 (11.16%) aligned 0 times
2862699 (70.64%) aligned exactly 1 time
737517 (18.20%) aligned >1 times
88.84% overall alignment rate
JK158b
14553950 reads
14553950 (100.00%) were unpaired
410872 (2.82%) aligned 0 times
11142088 (76.56%) aligned exactly 1 time
3000990 (20.62%) aligned >1 times
97.18% overall alignment rate
JK159b
13209219 reads
13209219 (100.00%) were unpaired
360835 (2.73%) aligned 0 times
10756957 (81.44%) aligned exactly 1 time
2091427 (15.83%) aligned >1 times
97.27% overall alignment rate
JK160b
14402133 reads
14402133 (100.00%) were unpaired
432058 (3.00%) aligned 0 times
11505382 (79.89%) aligned exactly 1 time
2464693 (17.11%) aligned >1 times
97.00% overall alignment rate
JK161b
17583852 reads
17583852 (100.00%) were unpaired
1350689 (7.68%) aligned 0 times
13255432 (75.38%) aligned exactly 1 time
2977731 (16.93%) aligned >1 times
92.32% overall alignment rate
JK184b
23081685 reads
23081685 (100.00%) were unpaired
2854777 (12.37%) aligned 0 times
17325914 (75.06%) aligned exactly 1 time
2900994 (12.57%) aligned >1 times
87.63% overall alignment rate
JK163
9654916 reads
9654916 (100.00%) were unpaired
1339444 (13.87%) aligned 0 times
7036724 (72.88%) aligned exactly 1 time
1278748 (13.24%) aligned >1 times
86.13% overall alignment rate
JK164
15631996 reads
15631996 (100.00%) were unpaired
1381049 (8.83%) aligned 0 times
12081521 (77.29%) aligned exactly 1 time
2169426 (13.88%) aligned >1 times
91.17% overall alignment rate
JK165
15897607 reads
15897607 (100.00%) were unpaired
556310 (3.50%) aligned 0 times
13340941 (83.92%) aligned exactly 1 time
2000356 (12.58%) aligned >1 times
96.50% overall alignment rate
JK166
15670415 reads
15670415 (100.00%) were unpaired
835736 (5.33%) aligned 0 times
12963068 (82.72%) aligned exactly 1 time
1871611 (11.94%) aligned >1 times
94.67% overall alignment rate
JK167
17231087 reads
17231087 (100.00%) were unpaired
2220920 (12.89%) aligned 0 times
13144781 (76.29%) aligned exactly 1 time
1865386 (10.83%) aligned >1 times
87.11% overall alignment rate
JK185
21942316 reads
21942316 (100.00%) were unpaired
2626147 (11.97%) aligned 0 times
16783109 (76.49%) aligned exactly 1 time
2533060 (11.54%) aligned >1 times
88.03% overall alignment rate
JK169
12560068 reads
12560068 (100.00%) were unpaired
2726193 (21.71%) aligned 0 times
8411113 (66.97%) aligned exactly 1 time
1422762 (11.33%) aligned >1 times
78.29% overall alignment rate
JK170
13535015 reads
13535015 (100.00%) were unpaired
844266 (6.24%) aligned 0 times
10827624 (80.00%) aligned exactly 1 time
1863125 (13.77%) aligned >1 times
93.76% overall alignment rate
JK171
17482179 reads
17482179 (100.00%) were unpaired
932753 (5.34%) aligned 0 times
14044680 (80.34%) aligned exactly 1 time
2504746 (14.33%) aligned >1 times
94.66% overall alignment rate
JK172
17200561 reads
17200561 (100.00%) were unpaired
1275838 (7.42%) aligned 0 times
13535352 (78.69%) aligned exactly 1 time
2389371 (13.89%) aligned >1 times
92.58% overall alignment rate
JK140
17361745 reads
17361745 (100.00%) were unpaired
817858 (4.71%) aligned 0 times
14013893 (80.72%) aligned exactly 1 time
2529994 (14.57%) aligned >1 times
95.29% overall alignment rate
JK186
22544012 reads
22544012 (100.00%) were unpaired
1375463 (6.10%) aligned 0 times
18004432 (79.86%) aligned exactly 1 time
3164117 (14.04%) aligned >1 times
93.90% overall alignment rate
JK129
11175253 reads
11175253 (100.00%) were unpaired
3183570 (28.49%) aligned 0 times
7116015 (63.68%) aligned exactly 1 time
875668 (7.84%) aligned >1 times
71.51% overall alignment rate
JK130
9294136 reads
9294136 (100.00%) were unpaired
3607160 (38.81%) aligned 0 times
4871001 (52.41%) aligned exactly 1 time
815975 (8.78%) aligned >1 times
61.19% overall alignment rate
JK131
7936231 reads
7936231 (100.00%) were unpaired
609278 (7.68%) aligned 0 times
6627679 (83.51%) aligned exactly 1 time
699274 (8.81%) aligned >1 times
92.32% overall alignment rate
JK132
2583721 reads
2583721 (100.00%) were unpaired
650958 (25.19%) aligned 0 times
1636364 (63.33%) aligned exactly 1 time
296399 (11.47%) aligned >1 times
74.81% overall alignment rate
JK125
13460740 reads
13460740 (100.00%) were unpaired
842643 (6.26%) aligned 0 times
10732674 (79.73%) aligned exactly 1 time
1885423 (14.01%) aligned >1 times
93.74% overall alignment rate
JK126
11715870 reads
11715870 (100.00%) were unpaired
899896 (7.68%) aligned 0 times
9245320 (78.91%) aligned exactly 1 time
1570654 (13.41%) aligned >1 times
92.32% overall alignment rate
JK127
11807104 reads
11807104 (100.00%) were unpaired
896337 (7.59%) aligned 0 times
9307660 (78.83%) aligned exactly 1 time
1603107 (13.58%) aligned >1 times
92.41% overall alignment rate
JK128
12635327 reads
12635327 (100.00%) were unpaired
1092807 (8.65%) aligned 0 times
9845279 (77.92%) aligned exactly 1 time
1697241 (13.43%) aligned >1 times
91.35% overall alignment rate
JK147
5878468 reads
5878468 (100.00%) were unpaired
3466586 (58.97%) aligned 0 times
2076973 (35.33%) aligned exactly 1 time
334909 (5.70%) aligned >1 times
41.03% overall alignment rate
JK148
9095654 reads
9095654 (100.00%) were unpaired
6220102 (68.39%) aligned 0 times
2438629 (26.81%) aligned exactly 1 time
436923 (4.80%) aligned >1 times
31.61% overall alignment rate
JK149
25338318 reads
25338318 (100.00%) were unpaired
9780520 (38.60%) aligned 0 times
13351161 (52.69%) aligned exactly 1 time
2206637 (8.71%) aligned >1 times
61.40% overall alignment rate
JK150
21509217 reads
21509217 (100.00%) were unpaired
8546458 (39.73%) aligned 0 times
10959332 (50.95%) aligned exactly 1 time
2003427 (9.31%) aligned >1 times
60.27% overall alignment rate
JK137
17427367 reads
17427367 (100.00%) were unpaired
2039933 (11.71%) aligned 0 times
13015697 (74.69%) aligned exactly 1 time
2371737 (13.61%) aligned >1 times
88.29% overall alignment rate
JK138
18224865 reads
18224865 (100.00%) were unpaired
2279781 (12.51%) aligned 0 times
13577292 (74.50%) aligned exactly 1 time
2367792 (12.99%) aligned >1 times
87.49% overall alignment rate
JK139
18786238 reads
18786238 (100.00%) were unpaired
1128644 (6.01%) aligned 0 times
14961156 (79.64%) aligned exactly 1 time
2696438 (14.35%) aligned >1 times
93.99% overall alignment rate
JK140
17361745 reads
17361745 (100.00%) were unpaired
817858 (4.71%) aligned 0 times
14013893 (80.72%) aligned exactly 1 time
2529994 (14.57%) aligned >1 times
95.29% overall alignment rate
HW01
8682734 reads; of these:
8682734 (100.00%) were unpaired; of these:
1913049 (22.03%) aligned 0 times
5909386 (68.06%) aligned exactly 1 time
860299 (9.91%) aligned >1 times
77.97% overall alignment rate
JK191
13829214 reads; of these:
13829214 (100.00%) were unpaired; of these:
1453867 (10.51%) aligned 0 times
10713702 (77.47%) aligned exactly 1 time
1661645 (12.02%) aligned >1 times
89.49% overall alignment rate
JK189
6195493 reads; of these:
6195493 (100.00%) were unpaired; of these:
1650216 (26.64%) aligned 0 times
3981661 (64.27%) aligned exactly 1 time
563616 (9.10%) aligned >1 times
73.36% overall alignment rate
JK192
11531890 reads; of these:
11531890 (100.00%) were unpaired; of these:
993360 (8.61%) aligned 0 times
9174335 (79.56%) aligned exactly 1 time
1364195 (11.83%) aligned >1 times
91.39% overall alignment rate
HW07
9697035 reads; of these:
9697035 (100.00%) were unpaired; of these:
422858 (4.36%) aligned 0 times
7941724 (81.90%) aligned exactly 1 time
1332453 (13.74%) aligned >1 times
95.64% overall alignment rate
JK195
10521229 reads; of these:
10521229 (100.00%) were unpaired; of these:
537457 (5.11%) aligned 0 times
8588817 (81.63%) aligned exactly 1 time
1394955 (13.26%) aligned >1 times
94.89% overall alignment rate
HW02
22669304 reads; of these:
22669304 (100.00%) were unpaired; of these:
4918948 (21.70%) aligned 0 times
15740618 (69.44%) aligned exactly 1 time
2009738 (8.87%) aligned >1 times
78.30% overall alignment rate
JK197
18073472 reads; of these:
18073472 (100.00%) were unpaired; of these:
557577 (3.09%) aligned 0 times
15193308 (84.06%) aligned exactly 1 time
2322587 (12.85%) aligned >1 times
96.91% overall alignment rate
HW04
26006759 reads; of these:
26006759 (100.00%) were unpaired; of these:
4363567 (16.78%) aligned 0 times
19123372 (73.53%) aligned exactly 1 time
2519820 (9.69%) aligned >1 times
83.22% overall alignment rate
JK198
8465221 reads; of these:
8465221 (100.00%) were unpaired; of these:
538089 (6.36%) aligned 0 times
7020764 (82.94%) aligned exactly 1 time
906368 (10.71%) aligned >1 times
93.64% overall alignment rate
JK200
7171321 reads; of these:
7171321 (100.00%) were unpaired; of these:
291635 (4.07%) aligned 0 times
6029376 (84.08%) aligned exactly 1 time
850310 (11.86%) aligned >1 times
95.93% overall alignment rate
HW06
14774536 reads; of these:
14774536 (100.00%) were unpaired; of these:
3849450 (26.05%) aligned 0 times
9667923 (65.44%) aligned exactly 1 time
1257163 (8.51%) aligned >1 times
73.95% overall alignment rate
JK199
11155204 reads; of these:
11155204 (100.00%) were unpaired; of these:
487922 (4.37%) aligned 0 times
9469500 (84.89%) aligned exactly 1 time
1197782 (10.74%) aligned >1 times
95.63% overall alignment rate
JK194
12105320 reads; of these:
12105320 (100.00%) were unpaired; of these:
245342 (2.03%) aligned 0 times
10111462 (83.53%) aligned exactly 1 time
1748516 (14.44%) aligned >1 times
97.97% overall alignment rate
HW08
10896751 reads; of these:
10896751 (100.00%) were unpaired; of these:
477726 (4.38%) aligned 0 times
8911281 (81.78%) aligned exactly 1 time
1507744 (13.84%) aligned >1 times
95.62% overall alignment rate
HW09
11143524 reads; of these:
11143524 (100.00%) were unpaired; of these:
279821 (2.51%) aligned 0 times
9376971 (84.15%) aligned exactly 1 time
1486732 (13.34%) aligned >1 times
97.49% overall alignment rate
JK196
10569386 reads; of these:
10569386 (100.00%) were unpaired; of these:
197169 (1.87%) aligned 0 times
8993791 (85.09%) aligned exactly 1 time
1378426 (13.04%) aligned >1 times
98.13% overall alignment rate
HW44
21357207 reads; of these:
21357207 (100.00%) were unpaired; of these:
467316 (2.19%) aligned 0 times
17836018 (83.51%) aligned exactly 1 time
3053873 (14.30%) aligned >1 times
97.81% overall alignment rate
HW45
16252997 reads; of these:
16252997 (100.00%) were unpaired; of these:
307621 (1.89%) aligned 0 times
13555983 (83.41%) aligned exactly 1 time
2389393 (14.70%) aligned >1 times
98.11% overall alignment rate
HW46
34275659 reads; of these:
34275659 (100.00%) were unpaired; of these:
13827849 (40.34%) aligned 0 times
17625015 (51.42%) aligned exactly 1 time
2822795 (8.24%) aligned >1 times
59.66% overall alignment rate
HW47
30603436 reads; of these:
30603436 (100.00%) were unpaired; of these:
4769051 (15.58%) aligned 0 times
22488108 (73.48%) aligned exactly 1 time
3346277 (10.93%) aligned >1 times
84.42% overall alignment rate
HW48
15969206 reads; of these:
15969206 (100.00%) were unpaired; of these:
2696191 (16.88%) aligned 0 times
11659572 (73.01%) aligned exactly 1 time
1613443 (10.10%) aligned >1 times
83.12% overall alignment rate
HW49
19677081 reads; of these:
19677081 (100.00%) were unpaired; of these:
1939084 (9.85%) aligned 0 times
15311526 (77.81%) aligned exactly 1 time
2426471 (12.33%) aligned >1 times
90.15% overall alignment rate
HW76
49589928 reads; of these:
49589928 (100.00%) were unpaired; of these:
3913746 (7.89%) aligned 0 times
39804975 (80.27%) aligned exactly 1 time
5871207 (11.84%) aligned >1 times
92.11% overall alignment rate
HW77
31484353 reads; of these:
31484353 (100.00%) were unpaired; of these:
3135513 (9.96%) aligned 0 times
24739455 (78.58%) aligned exactly 1 time
3609385 (11.46%) aligned >1 times
90.04% overall alignment rate
HW78
37774579 reads; of these:
37774579 (100.00%) were unpaired; of these:
4692800 (12.42%) aligned 0 times
28842247 (76.35%) aligned exactly 1 time
4239532 (11.22%) aligned >1 times
87.58% overall alignment rate
HW79
35952888 reads; of these:
35952888 (100.00%) were unpaired; of these:
4348807 (12.10%) aligned 0 times
27647519 (76.90%) aligned exactly 1 time
3956562 (11.00%) aligned >1 times
87.90% overall alignment rate
HW58
22718583 reads; of these:
22718583 (100.00%) were unpaired; of these:
859656 (3.78%) aligned 0 times
18629213 (82.00%) aligned exactly 1 time
3229714 (14.22%) aligned >1 times
96.22% overall alignment rate
HW59
21555745 reads; of these:
21555745 (100.00%) were unpaired; of these:
435521 (2.02%) aligned 0 times
18001863 (83.51%) aligned exactly 1 time
3118361 (14.47%) aligned >1 times
97.98% overall alignment rate
HW68_1
16895211 reads; of these:
16895211 (100.00%) were unpaired; of these:
597685 (3.54%) aligned 0 times
13883634 (82.17%) aligned exactly 1 time
2413892 (14.29%) aligned >1 times
96.46% overall alignment rate
HW69_1
17778168 reads; of these:
17778168 (100.00%) were unpaired; of these:
465356 (2.62%) aligned 0 times
14774504 (83.10%) aligned exactly 1 time
2538308 (14.28%) aligned >1 times
97.38% overall alignment rate
HW51
32082780 reads; of these:
32082780 (100.00%) were unpaired; of these:
2832744 (8.83%) aligned 0 times
25391520 (79.14%) aligned exactly 1 time
3858516 (12.03%) aligned >1 times
91.17% overall alignment rate
HW55
31450575 reads; of these:
31450575 (100.00%) were unpaired; of these:
2344352 (7.45%) aligned 0 times
25111072 (79.84%) aligned exactly 1 time
3995151 (12.70%) aligned >1 times
92.55% overall alignment rate
HW61_1
15932286 reads; of these:
15932286 (100.00%) were unpaired; of these:
1408213 (8.84%) aligned 0 times
12420296 (77.96%) aligned exactly 1 time
2103777 (13.20%) aligned >1 times
91.16% overall alignment rate
HW65_1
46051718 reads; of these:
46051718 (100.00%) were unpaired; of these:
3292939 (7.15%) aligned 0 times
36510449 (79.28%) aligned exactly 1 time
6248330 (13.57%) aligned >1 times
92.85% overall alignment rate
HW52
28233654 reads; of these:
28233654 (100.00%) were unpaired; of these:
4916862 (17.41%) aligned 0 times
20094695 (71.17%) aligned exactly 1 time
3222097 (11.41%) aligned >1 times
82.59% overall alignment rate
HW56
23293657 reads; of these:
23293657 (100.00%) were unpaired; of these:
2244297 (9.63%) aligned 0 times
18304420 (78.58%) aligned exactly 1 time
2744940 (11.78%) aligned >1 times
90.37% overall alignment rate
HW62_1
16093205 reads; of these:
16093205 (100.00%) were unpaired; of these:
2474793 (15.38%) aligned 0 times
11651230 (72.40%) aligned exactly 1 time
1967182 (12.22%) aligned >1 times
84.62% overall alignment rate
HW66_1
23584290 reads; of these:
23584290 (100.00%) were unpaired; of these:
1664965 (7.06%) aligned 0 times
18589248 (78.82%) aligned exactly 1 time
3330077 (14.12%) aligned >1 times
92.94% overall alignment rate

## Sheet: HiC_data
Name	library ID	reps	strain	stage	treatment	raw file	raw file	processed file	processed file
control rep1		rep1	CA1200	L3	1hrauxin	GSM5690980	GSM5690980
control rep2		rep2	CA1200	L3	1hrauxin	GSM5690981	GSM5690981
HiC_JK05_1hrauxin_L3_rep1	JK153	rep1	JK05	L3	1hrauxin	JK153_R1.fastq.gz	JK153_R2.fastq.gz	smc3depletion_JK05_L3_1hrauxin_combined_30.hic	jetcall_strength.bed
HiC_JK05_1hrauxin_L3_rep2	JK180	rep2	JK05	L3	1hrauxin	JK180_R1.fastq.gz	JK180_R2.fastq.gz	smc3depletion_JK05_L3_1hrauxin_combined_30.hic	jetcall_strength.bed
HiC_JK06_1hrauxin_L3_rep1a	JK155a	rep1a	JK06	L3	1hrauxin	JK155a_R1.fastq.gz	JK155a_R2.fastq.gz	wapldepletion_JK06_L3_1hrauxin_combined_30.hic	jetcall_strength.bed
HiC_JK06_1hrauxin_L3_rep1b	JK155b	rep1b	JK06	L3	1hrauxin	JK155b_R1.fastq.gz	JK155b_R2.fastq.gz	wapldepletion_JK06_L3_1hrauxin_combined_30.hic	jetcall_strength.bed
HiC_JK06_1hrauxin_L3_rep2	JK181	rep2	JK06	L3	1hrauxin	JK181_R1.fastq.gz	JK181_R2.fastq.gz	wapldepletion_JK06_L3_1hrauxin_combined_30.hic	jetcall_strength.bed

## Sheet: HiC_stats
Library ID	JK153	JK180	JK155a	JK155b	JK181
Sequenced Read Pairs	214829655	229703946	61799473	366498848	228848195
Normal Paired	144,464,506 (67.25%)	164,460,280 (71.60%)	42,531,986 (68.82%)	253,463,868 (69.16%)	165,428,322 (72.29%)
Chimeric Paired	59,855,750 (27.86%)	53,829,643 (23.43%)	16,539,651 (26.76%)	95,269,202 (25.99%)	51,482,081 (22.50%)
Chimeric Ambiguous	6,350,125 (2.96%)	7,490,645 (3.26%)	1,812,694 (2.93%)	11,045,504 (3.01%)	7,932,340 (3.47%)
Unmapped	4,159,274 (1.94%)	3,923,378 (1.71%)	915,142 (1.48%)	6,720,274 (1.83%)	4,005,452 (1.75%)
Ligation Motif Present	21,719,832 (10.11%)	19,546,121 (8.51%)	6,387,682 (10.34%)	37,375,863 (10.20%)	18,409,632 (8.04%)
Alignable (Normal+Chimeric Paired)	204,320,256 (95.11%)	218,289,923 (95.03%)	59,071,637 (95.59%)	348,733,070 (95.15%)	216,910,403 (94.78%)
Unique Reads	174,991,111 (81.46%)	174,882,290 (76.13%)	54,195,129 (87.70%)	299,877,710 (81.82%)	169,231,564 (73.95%)
PCR Duplicates	28,381,917 (13.21%)	42,366,332 (18.44%)	4,477,565 (7.25%)	48,111,287 (13.13%)	46,772,529 (20.44%)
Optical Duplicates	947,228 (0.44%)	1,041,301 (0.45%)	398,943 (0.65%)	744,073 (0.20%)	906,310 (0.40%)
Library Complexity Estimate	659145997	481958339	364597868	1139615906	423821616
Intra-fragment Reads	328,442 (0.15% / 0.19%)	357,929 (0.16% / 0.20%)	96,342 (0.16% / 0.18%)	512,125 (0.14% / 0.17%)	475,159 (0.21% / 0.28%)
Below MAPQ Threshold	23,398,236 (10.89% / 13.37%)	25,238,904 (10.99% / 14.43%)	7,188,864 (11.63% / 13.26%)	40,415,555 (11.03% / 13.48%)	25,086,389 (10.96% / 14.82%)
Hi-C Contacts	151,264,433 (70.41% / 86.44%)	149,285,457 (64.99% / 85.36%)	46,909,923 (75.91% / 86.56%)	258,950,030 (70.66% / 86.35%)	143,670,016 (62.78% / 84.90%)
Ligation Motif Present	12,253,970 (5.70% / 7.00%)	9,875,741 (4.30% / 5.65%)	3,976,576 (6.43% / 7.34%)	20,937,847 (5.71% / 6.98%)	9,010,541 (3.94% / 5.32%)
3' Bias (Long Range)	52% - 48%	51% - 49%	52% - 48%	52% - 48%	51% - 49%
Pair Type %(L-I-O-R)	25% - 25% - 25% - 25%	25% - 25% - 25% - 25%	25% - 25% - 25% - 25%	25% - 25% - 25% - 25%	25% - 25% - 25% - 25%
Inter-chromosomal	8,488,868 (3.95% / 4.85%)	9,212,185 (4.01% / 5.27%)	1,598,843 (2.59% / 2.95%)	9,174,925 (2.50% / 3.06%)	5,864,504 (2.56% / 3.47%)
Intra-chromosomal	142,775,565 (66.46% / 81.59%)	140,073,272 (60.98% / 80.10%)	45,311,080 (73.32% / 83.61%)	249,775,105 (68.15% / 83.29%)	137,805,512 (60.22% / 81.43%)
Short Range (<20Kb)	62,786,014 (29.23% / 35.88%)	55,049,218 (23.97% / 31.48%)	20,808,547 (33.67% / 38.40%)	109,509,134 (29.88% / 36.52%)	55,949,439 (24.45% / 33.06%)
Long Range (>20Kb)	79,988,366 (37.23% / 45.71%)	85,022,514 (37.01% / 48.62%)	24,501,855 (39.65% / 45.21%)	140,261,847 (38.27% / 46.77%)	81,854,794 (35.77% / 48.37%)

## Sheet: mRNA-seq
Name	library ID	reps	strain	stage	treatment	raw file	GEO #
JK05 1h no auxin	JK173	1	JK05	L3	1h no auxin	H7K2HBGXN_n01_JK173.fastq.gz	GSE237718
JK05 1h no auxin	JK174	2	JK05	L3	1h no auxin	H7K2HBGXN_n01_JK174.fastq.gz	GSE237719
JK05 1h auxin	JK175	1	JK05	L3	1h auxin	H7K2HBGXN_n01_JK175.fastq.gz	GSE237720
JK05 1h auxin	JK176	2	JK05	L3	1h auxin	H7K2HBGXN_n01_JK176.fastq.gz	GSE237721
JK05 4hr auxin	HW16	1	JK05	L3	4h auxin	HWVLJBGXT_n01_HW16.fastq.gz	GSE237722
JK05 4hr auxin	HW17	2	JK05	L3	4h auxin	HWVLJBGXT_n01_HW17.fastq.gz	GSE237723
JK06 1h no auxin	JK177	1	JK06	L3	1h no auxin	H7K2HBGXN_n01_JK177.fastq.gz	GSE237724
JK06 1h no auxin	JK178	2	JK06	L3	1h no auxin	H7K2HBGXN_n01_JK174.fastq.gz	GSE237725
JK06 1h auxin	JK179	1	JK06	L3	1h auxin	H7K2HBGXN_n01_JK179.fastq.gz	GSE237726
JK06 1h auxin	JK180b	2	JK06	L3	1h auxin	H7K2HBGXN_n01_JK180b.fastq.gz	GSE237727
JK06 4h auxin	HW18	1	JK06	L3	4h auxin	HWVLJBGXT_n01_HW18.fastq.gz	GSE237728
JK06 4h auxin	HW19	2	JK06	L3	4h auxin	HWVLJBGXT_n01_HW19.fastq.gz	GSE237729
CA1200 4h auxin	HW14	1	CA1200	L3	4h auxin	HWVLJBGXT_n01_HW14.fastq.gz	GSE237730
CA1200 4h auxin	HW15	2	CA1200	L3	4h auxin	HWVLJBGXT_n01_HW15.fastq.gz	GSE237731

## Sheet: Stringent-Majority Peaks
SMC-3 ChIP majority peaks in control					SMC-3 ChIP majority peaks in in SMC-3 depletion					SMC-3 ChIP majority peaks in in WAPL-1 depletion					PQN-85 (NIPBL homolog) majority peaks in control					PQN-85 (NIPBL homolog) majority peaks in SMC-3 depletion					PQN-85 (NIPBL homolog) majority peaks in WAPL-1 depletion
chrom	start	stop	summit_relative_to_start		chrom	start	stop	summit_relative_to_start		chrom	start	stop	summit_relative_to_start		chrom	start	stop	summit_relative_to_start		chrom	start	stop	summit_relative_to_start		chrom	start	stop	summit_relative_to_start
chrI	0	462	184		chrI	0	481	288		chrI	3212	4166	714		chrI	0	460	146		chrI	0	469	141		chrI	0	462	184
chrI	3519	4140	381		chrI	22149	22626	221		chrI	16728	17419	295		chrI	3543	4180	402		chrI	3467	4130	445		chrI	3519	4140	381
chrI	16755	17242	258		chrI	316080	316539	243		chrI	22141	22654	244		chrI	16706	17307	304		chrI	16756	17265	260		chrI	16755	17242	258
chrI	22159	22623	240		chrI	461514	462041	252		chrI	26740	27586	334		chrI	22133	22619	244		chrI	22123	22629	250		chrI	22159	22623	240
chrI	26854	27381	239		chrI	649977	651687	561		chrI	46884	47446	267		chrI	26848	27416	238		chrI	26842	27425	282		chrI	26854	27381	239
chrI	32630	32989	200		chrI	933457	934799	317		chrI	108098	108827	347		chrI	32583	32939	193		chrI	32545	32999	246		chrI	32630	32989	200
chrI	35225	35645	185		chrI	1120920	1124108	2701		chrI	110487	110968	250		chrI	35247	35647	209		chrI	39635	40035	224		chrI	35225	35645	185
chrI	39576	40399	266		chrI	1372336	1373358	64		chrI	182714	183220	253		chrI	39528	40687	292		chrI	41999	42452	260		chrI	39576	40399	266
chrI	69961	70369	198		chrI	1446792	1447374	266		chrI	288930	289447	236		chrI	41977	42479	281		chrI	69984	70338	153		chrI	69961	70369	198
chrI	108151	108827	200		chrI	1836589	1837225	222		chrI	315008	315493	274		chrI	47057	47395	108		chrI	108161	108755	326		chrI	108151	108827	200
chrI	110074	110963	639		chrI	2036364	2036901	240		chrI	315974	316598	333		chrI	69941	70373	215		chrI	110483	110971	244		chrI	110074	110963	639
chrI	280570	281269	503		chrI	2409925	2410416	251		chrI	317958	318703	291		chrI	110465	110969	287		chrI	182742	183188	209		chrI	280570	281269	503
chrI	299654	300009	210		chrI	2639643	2639976	157		chrI	323331	323951	315		chrI	182731	183187	214		chrI	296006	296495	324		chrI	299654	300009	210
chrI	315015	315542	241		chrI	3037869	3038288	179		chrI	382304	382875	206		chrI	288985	289452	218		chrI	315012	315667	256		chrI	315015	315542	241
chrI	316007	316545	312		chrI	3171598	3172144	268		chrI	397696	398384	280		chrI	296115	296566	248		chrI	316015	316543	288		chrI	316007	316545	312
chrI	318016	318365	204		chrI	3664243	3665508	637		chrI	414338	414753	183		chrI	314999	315578	249		chrI	323505	323817	137		chrI	318016	318365	204
chrI	323499	323833	184		chrI	3987063	3987501	193		chrI	433559	433941	214		chrI	315992	316558	284		chrI	382294	382809	240		chrI	323499	323833	184
chrI	354747	355215	250		chrI	4171904	4172601	363		chrI	461365	462199	380		chrI	323475	323884	185		chrI	397670	398320	312		chrI	354747	355215	250
chrI	382289	382786	231		chrI	4340742	4357725	1643		chrI	462699	463375	238		chrI	382232	382826	312		chrI	435431	435856	167		chrI	382289	382786	231
chrI	397631	398324	340		chrI	4544686	4546380	1358		chrI	470850	471295	258		chrI	397673	398354	286		chrI	461518	462076	237		chrI	397631	398324	340
chrI	435362	435818	234		chrI	4546519	4547719	483		chrI	488150	488753	280		chrI	433523	433924	252		chrI	488184	488633	222		chrI	435362	435818	234
chrI	461498	461981	243		chrI	4701258	4701667	124		chrI	510492	511261	367		chrI	461515	462041	257		chrI	518241	518783	282		chrI	461498	461981	243
chrI	470886	471259	174		chrI	4769245	4769878	356		chrI	534054	534551	256		chrI	488194	488650	233		chrI	524344	524864	347		chrI	470886	471259	174
chrI	488199	488705	198		chrI	5153291	5153867	218		chrI	535237	535682	215		chrI	518148	518840	387		chrI	527171	528335	876		chrI	488199	488705	198
chrI	516541	517020	237		chrI	5164912	5165268	120		chrI	536641	537129	230		chrI	524333	524863	254		chrI	529957	531169	286		chrI	516541	517020	237
chrI	518154	518845	441		chrI	5637818	5638187	216		chrI	542298	542880	146		chrI	527202	528297	701		chrI	535211	535732	245		chrI	518154	518845	441
chrI	524320	524831	291		chrI	5706760	5707304	242		chrI	560981	561468	177		chrI	535190	535748	257		chrI	536609	537159	272		chrI	524320	524831	291
chrI	535224	535701	211		chrI	6105459	6106032	350		chrI	649943	651555	1263		chrI	536595	537167	289		chrI	650177	650929	158		chrI	535224	535701	211
chrI	536608	537115	260		chrI	6212507	6213048	287		chrI	669833	670206	149		chrI	663461	663850	219		chrI	794255	794572	147		chrI	536608	537115	260
chrI	547981	548316	188		chrI	6723115	6723551	181		chrI	670636	671432	458		chrI	794253	794599	175		chrI	801257	801702	196		chrI	547981	548316	188
chrI	650067	651622	631		chrI	6772221	6773316	293		chrI	677007	677373	188		chrI	801223	801733	225		chrI	851945	852341	205		chrI	650067	651622	631
chrI	669612	670339	359		chrI	6949251	6949646	208		chrI	835158	835661	394		chrI	813890	814288	160		chrI	879729	880415	169		chrI	669612	670339	359
chrI	670569	671495	449		chrI	7492569	7493093	236		chrI	852076	852394	147		chrI	815969	816491	261		chrI	881193	882093	580		chrI	670569	671495	449
chrI	794278	794588	159		chrI	7866439	7867543	488		chrI	852584	853584	753		chrI	853163	853571	172		chrI	882392	883304	600		chrI	794278	794588	159
chrI	801320	801768	135		chrI	9505867	9506267	147		chrI	869973	873312	2091		chrI	871803	872270	194		chrI	933431	934790	331		chrI	801320	801768	135
chrI	813817	814251	249		chrI	10204146	10205206	418		chrI	882424	883255	577		chrI	881164	882196	559		chrI	961156	961624	193		chrI	813817	814251	249
chrI	815970	816418	237		chrI	10206239	10207336	837		chrI	895756	896409	319		chrI	882393	883267	607		chrI	998920	999517	288		chrI	815970	816418	237
chrI	852019	852358	184		chrI	10208204	10209510	491		chrI	933495	934754	590		chrI	933482	934758	289		chrI	1034153	1034586	212		chrI	852019	852358	184
chrI	853123	853533	217		chrI	10212342	10213555	733		chrI	945890	946370	220		chrI	961146	961641	252		chrI	1053485	1054052	306		chrI	853123	853533	217
chrI	871736	872427	314		chrI	10216592	10219148	1408		chrI	947727	948524	352		chrI	972958	973305	179		chrI	1061847	1062511	343		chrI	871736	872427	314
chrI	879683	880092	215		chrI	10266302	10277145	4373		chrI	961220	962090	236		chrI	988899	989294	197		chrI	1066914	1067410	238		chrI	879683	880092	215
chrI	881579	882096	342		chrI	10516829	10517382	360		chrI	964839	965685	222		chrI	998927	999523	317		chrI	1068009	1068708	386		chrI	881579	882096	342
chrI	882467	883328	481		chrI	10565078	10565538	180		chrI	972929	973333	185		chrI	1034136	1034608	220		chrI	1069067	1070438	986		chrI	882467	883328	481
chrI	895933	896300	122		chrI	10653416	10653878	234		chrI	998910	999555	359		chrI	1049064	1049494	182		chrI	1251441	1251894	209		chrI	895933	896300	122
chrI	933429	934794	328		chrI	10718166	10718638	190		chrI	1026834	1028099	762		chrI	1053475	1054053	282		chrI	1273641	1274393	311		chrI	933429	934794	328
chrI	954304	954739	206		chrI	10927302	10927805	213		chrI	1029821	1030436	354		chrI	1061749	1062530	462		chrI	1339942	1340386	240		chrI	954304	954739	206
chrI	961217	961616	130		chrI	10946131	10947076	445		chrI	1034059	1034828	309		chrI	1066879	1067466	283		chrI	1415921	1416387	258		chrI	961217	961616	130
chrI	998866	999522	393		chrI	10947311	10948123	439		chrI	1039608	1041327	200		chrI	1067900	1068857	420		chrI	1435228	1435903	457		chrI	998866	999522	393
chrI	1034136	1034607	260		chrI	10948390	10950446	1112		chrI	1048895	1050207	384		chrI	1069060	1070452	993		chrI	1444037	1444671	267		chrI	1034136	1034607	260
chrI	1048906	1049649	328		chrI	10951206	10953113	1512		chrI	1053539	1054038	207		chrI	1155965	1156406	207		chrI	1446805	1447375	281		chrI	1048906	1049649	328
chrI	1053451	1054025	329		chrI	11374199	11374703	250		chrI	1061979	1062436	186		chrI	1251388	1251886	221		chrI	1481450	1482026	204		chrI	1053451	1054025	329
chrI	1061931	1062489	245		chrI	12198362	12198890	281		chrI	1066879	1067457	265		chrI	1273637	1274350	329		chrI	1598229	1598882	329		chrI	1061931	1062489	245
chrI	1066873	1067405	281		chrI	13160848	13161170	215		chrI	1068019	1068701	270		chrI	1296490	1296872	135		chrI	1628489	1629020	380		chrI	1066873	1067405	281
chrI	1067936	1068724	401		chrI	13463713	13464310	234		chrI	1069623	1070526	316		chrI	1339925	1340401	226		chrI	1676397	1676819	235		chrI	1067936	1068724	401
chrI	1069134	1070405	806		chrI	14058632	14059031	213		chrI	1076169	1078164	1256		chrI	1361156	1361641	357		chrI	1691193	1691777	320		chrI	1069134	1070405	806
chrI	1155988	1156382	202		chrI	14886856	14889222	2105		chrI	1156038	1156390	138		chrI	1415893	1416415	247		chrI	1697720	1698325	326		chrI	1155988	1156382	202
chrI	1251427	1251973	235		chrI	15060297	15071340	4454		chrI	1175684	1176100	200		chrI	1435192	1435922	449		chrI	1700983	1701463	264		chrI	1251427	1251973	235
chrI	1273705	1274397	283		chrI	15071865	15072395	222		chrI	1211160	1212381	719		chrI	1443964	1444709	334		chrI	1719023	1719606	272		chrI	1273705	1274397	283
chrI	1277216	1277553	187		chrII	1320503	1320841	149		chrI	1240622	1241404	260		chrI	1446762	1447352	329		chrI	1807783	1808336	270		chrI	1277216	1277553	187
chrI	1279280	1280219	183		chrII	1661282	1661759	240		chrI	1244990	1245689	374		chrI	1481404	1482018	259		chrI	1823032	1823391	160		chrI	1279280	1280219	183
chrI	1313602	1314032	219		chrII	2889185	2889616	195		chrI	1246915	1247656	579		chrI	1540417	1541035	283		chrI	1835334	1835845	249		chrI	1313602	1314032	219
chrI	1317424	1317919	319		chrII	3439122	3439608	274		chrI	1247740	1249294	816		chrI	1558801	1559448	395		chrI	1836148	1837513	761		chrI	1317424	1317919	319
chrI	1339830	1340367	320		chrII	4047847	4048303	215		chrI	1251424	1252005	215		chrI	1581807	1582269	243		chrI	1841884	1842365	241		chrI	1339830	1340367	320
chrI	1361233	1361679	221		chrII	4603029	4603449	168		chrI	1272260	1274757	1705		chrI	1596370	1596834	255		chrI	1873599	1874244	361		chrI	1361233	1361679	221
chrI	1392821	1393244	198		chrII	4641488	4642203	461		chrI	1277141	1278314	330		chrI	1598191	1598935	411		chrI	1877675	1878096	224		chrI	1392821	1393244	198
chrI	1415923	1416391	220		chrII	4942286	4942765	241		chrI	1279254	1280869	1064		chrI	1628522	1629037	255		chrI	2024579	2025042	223		chrI	1415923	1416391	220
chrI	1429698	1430174	243		chrII	5104979	5105485	264		chrI	1288218	1289316	771		chrI	1651137	1651671	311		chrI	2036177	2036882	444		chrI	1429698	1430174	243
chrI	1435121	1435837	519		chrII	5145150	5146601	289		chrI	1296457	1296936	242		chrI	1676383	1676831	225		chrI	2039631	2040121	266		chrI	1435121	1435837	519
chrI	1444021	1444685	232		chrII	5346359	5346890	257		chrI	1327833	1333088	1097		chrI	1691161	1691836	336		chrI	2044954	2045362	206		chrI	1444021	1444685	232
chrI	1446912	1447313	179		chrII	5543323	5544377	257		chrI	1339709	1340430	466		chrI	1697775	1698381	263		chrI	2084776	2085423	234		chrI	1446912	1447313	179
chrI	1481431	1482075	180		chrII	5844540	5845255	267		chrI	1345640	1346749	705		chrI	1700997	1701466	229		chrI	2096895	2097306	215		chrI	1481431	1482075	180
chrI	1540186	1541286	496		chrII	6061546	6061916	123		chrI	1346954	1347516	473		chrI	1701707	1702138	190		chrI	2290987	2291536	234		chrI	1540186	1541286	496
chrI	1558863	1559395	381		chrII	6889309	6890818	1424		chrI	1392760	1393441	248		chrI	1719020	1719605	291		chrI	2292714	2293255	287		chrI	1558863	1559395	381
chrI	1581898	1582272	204		chrII	6913298	6913688	163		chrI	1394009	1394613	303		chrI	1807672	1808354	353		chrI	2321743	2322203	229		chrI	1581898	1582272	204
chrI	1593859	1594357	337		chrII	7183848	7184299	246		chrI	1415827	1416403	291		chrI	1823010	1823518	238		chrI	2401408	2401875	237		chrI	1593859	1594357	337
chrI	1598313	1598867	294		chrII	7199906	7200547	276		chrI	1435153	1435911	503		chrI	1832461	1832950	220		chrI	2433549	2433961	206		chrI	1598313	1598867	294
chrI	1601432	1601814	176		chrII	7478709	7479082	130		chrI	1443991	1444652	269		chrI	1835043	1837473	1822		chrI	2485454	2485855	198		chrI	1601432	1601814	176
chrI	1628486	1629009	278		chrII	8075182	8075674	243		chrI	1446832	1447400	242		chrI	1841823	1842454	313		chrI	2576959	2577633	396		chrI	1628486	1629009	278
chrI	1651095	1651564	328		chrII	8288601	8289755	879		chrI	1514390	1514907	206		chrI	1870694	1871063	188		chrI	2579900	2580605	345		chrI	1651095	1651564	328
chrI	1661835	1662467	191		chrII	8289832	8290957	350		chrI	1540383	1541139	257		chrI	1873566	1874283	396		chrI	2587203	2587919	417		chrI	1661835	1662467	191
chrI	1676426	1676831	208		chrII	8743617	8744533	200		chrI	1558783	1559446	390		chrI	2021265	2021708	217		chrI	2591388	2592023	376		chrI	1676426	1676831	208
chrI	1691166	1691813	392		chrII	9590990	9591429	219		chrI	1575448	1576028	284		chrI	2024567	2025035	239		chrI	2603592	2604268	216		chrI	1691166	1691813	392
chrI	1697697	1698297	355		chrII	9774507	9775028	276		chrI	1593660	1594397	511		chrI	2036211	2036879	417		chrI	2605204	2605580	207		chrI	1697697	1698297	355
chrI	1701007	1701449	227		chrII	10033446	10033921	243		chrI	1598237	1598942	402		chrI	2039610	2040121	251		chrI	2639550	2640079	246		chrI	1701007	1701449	227
chrI	1718986	1719570	281		chrII	10034598	10035071	260		chrI	1601387	1601916	254		chrI	2044900	2045375	260		chrI	2654455	2654848	258		chrI	1718986	1719570	281
chrI	1740434	1741260	502		chrII	10537922	10538276	136		chrI	1606075	1608306	1817		chrI	2049977	2050354	254		chrI	2655765	2656153	194		chrI	1740434	1741260	502
chrI	1807757	1808305	285		chrII	10839990	10840450	222		chrI	1609847	1610448	336		chrI	2084740	2085388	276		chrI	2657181	2657503	110		chrI	1807757	1808305	285
chrI	1822994	1823461	223		chrII	11757056	11758230	405		chrI	1620047	1621191	943		chrI	2096871	2097307	203		chrI	2659571	2660062	258		chrI	1822994	1823461	223
chrI	1835278	1835854	330		chrII	11759219	11759673	176		chrI	1628505	1629015	265		chrI	2290963	2291645	270		chrI	2667766	2668179	172		chrI	1835278	1835854	330
chrI	1836210	1837483	662		chrII	12494475	12494945	211		chrI	1651137	1651622	273		chrI	2292720	2293262	265		chrI	2668461	2668948	210		chrI	1836210	1837483	662
chrI	1841830	1842323	236		chrII	12677944	12678297	107		chrI	1676323	1676819	291		chrI	2312882	2313417	274		chrI	2679462	2679867	185		chrI	1841830	1842323	236
chrI	1870659	1871133	262		chrII	12843640	12844185	262		chrI	1691321	1691781	236		chrI	2321737	2322218	247		chrI	2681353	2682045	241		chrI	1870659	1871133	262
chrI	1873508	1874210	415		chrII	12844272	12844782	254		chrI	1700953	1701528	270		chrI	2401378	2401891	268		chrI	2682801	2683253	186		chrI	1873508	1874210	415
chrI	1877724	1878099	208		chrII	12844943	12846134	351		chrI	1701713	1702149	200		chrI	2414016	2414418	188		chrI	2688722	2689701	238		chrI	1877724	1878099	208
chrI	1894934	1895361	219		chrII	12944426	12945104	330		chrI	1708090	1711677	1094		chrI	2433587	2434011	186		chrI	2705819	2706434	445		chrI	1894934	1895361	219
chrI	1958354	1958734	209		chrII	13016283	13016742	238		chrI	1717120	1717793	467		chrI	2485405	2485875	241		chrI	2776005	2776429	263		chrI	1958354	1958734	209
chrI	2011165	2011670	245		chrII	13834206	13834630	223		chrI	1719002	1719511	213		chrI	2532915	2533285	220		chrI	2857527	2857985	243		chrI	2011165	2011670	245
chrI	2021212	2021718	216		chrII	13985550	13986654	241		chrI	1740237	1741914	691		chrI	2534975	2535362	192		chrI	2863949	2864432	251		chrI	2021212	2021718	216
chrI	2024564	2025069	261		chrII	14251466	14251873	253		chrI	1750896	1751618	287		chrI	2576975	2577643	342		chrI	2876350	2876948	324		chrI	2024564	2025069	261
chrI	2036384	2036980	367		chrII	14337824	14338167	60		chrI	1766556	1767175	307		chrI	2579854	2580691	336		chrI	2927937	2928405	238		chrI	2036384	2036980	367
chrI	2039597	2040184	271		chrII	14338340	14339091	349		chrI	1770816	1771165	202		chrI	2585897	2586642	378		chrI	2967543	2967947	207		chrI	2039597	2040184	271
chrI	2044973	2045336	165		chrII	14561569	14562025	218		chrI	1807567	1808373	429		chrI	2587147	2587957	447		chrI	2995829	2996618	553		chrI	2044973	2045336	165
chrI	2050028	2050441	197		chrII	14804146	14804961	282		chrI	1822826	1823626	409		chrI	2591392	2591935	252		chrI	3032677	3033138	248		chrI	2050028	2050441	197
chrI	2070699	2071112	186		chrII	15089426	15089773	184		chrI	1825880	1826593	257		chrI	2603563	2604326	272		chrI	3037813	3038291	231		chrI	2070699	2071112	186
chrI	2084762	2085371	232		chrIII	502574	503073	203		chrI	1832428	1832923	265		chrI	2605179	2605687	279		chrI	3070035	3070496	241		chrI	2084762	2085371	232
chrI	2096885	2097248	212		chrIII	1017307	1020619	2062		chrI	1835231	1835849	353		chrI	2639541	2640122	273		chrI	3121578	3122271	265		chrI	2096885	2097248	212
chrI	2291005	2291741	234		chrIII	1299949	1300950	83		chrI	1836296	1837461	684		chrI	2654412	2654888	199		chrI	3162390	3162888	253		chrI	2291005	2291741	234
chrI	2292751	2293175	235		chrIII	1301297	1302974	1255		chrI	1841824	1842585	291		chrI	2657135	2657527	177		chrI	3227927	3228341	185		chrI	2292751	2293175	235
chrI	2321778	2322191	208		chrIII	1618914	1619314	199		chrI	1861656	1862329	285		chrI	2659527	2660221	196		chrI	3265841	3266317	245		chrI	2321778	2322191	208
chrI	2401406	2401852	243		chrIII	2077657	2082592	3648		chrI	1873619	1874196	323		chrI	2661298	2661677	175		chrI	3266542	3267020	234		chrI	2401406	2401852	243
chrI	2414074	2414459	195		chrIII	2497131	2498464	511		chrI	1894868	1895400	260		chrI	2662538	2662979	231		chrI	3297000	3297449	186		chrI	2414074	2414459	195
chrI	2433565	2433901	189		chrIII	2498547	2501814	619		chrI	1958311	1958786	241		chrI	2663621	2664316	186		chrI	3298086	3298718	306		chrI	2433565	2433901	189
chrI	2571095	2571401	156		chrIII	3334461	3337034	705		chrI	1978648	1979091	217		chrI	2667740	2668971	951		chrI	3316456	3316899	205		chrI	2571095	2571401	156
chrI	2577035	2577696	278		chrIII	3456227	3456631	186		chrI	2021214	2021692	245		chrI	2672305	2672838	352		chrI	3501155	3501504	191		chrI	2577035	2577696	278
chrI	2579887	2580595	327		chrIII	3854889	3855299	197		chrI	2024526	2025113	231		chrI	2677969	2678457	270		chrI	3516206	3516664	227		chrI	2579887	2580595	327
chrI	2586050	2586983	303		chrIII	3856880	3857428	290		chrI	2036394	2037037	347		chrI	2681386	2681880	236		chrI	3553263	3553682	213		chrI	2586050	2586983	303
chrI	2587265	2587953	398		chrIII	3867213	3867789	333		chrI	2039597	2040092	193		chrI	2682759	2683347	244		chrI	3647808	3648493	349		chrI	2587265	2587953	398
chrI	2591418	2591954	268		chrIII	4369295	4369949	235		chrI	2050128	2050413	103		chrI	2688684	2689627	228		chrI	3649267	3649728	235		chrI	2591418	2591954	268
chrI	2603583	2604328	233		chrIII	4378517	4379388	491		chrI	2063867	2064274	206		chrI	2726520	2726937	208		chrI	3650624	3651087	236		chrI	2603583	2604328	233
chrI	2605166	2605651	243		chrIII	4426691	4427213	253		chrI	2066139	2066513	188		chrI	2776033	2776499	214		chrI	3672629	3673273	183		chrI	2605166	2605651	243
chrI	2620292	2620722	198		chrIII	4689511	4689981	254		chrI	2070653	2071154	263		chrI	2863944	2864531	224		chrI	3679681	3680372	470		chrI	2620292	2620722	198
chrI	2636113	2636462	143		chrIII	4899674	4900095	213		chrI	2076892	2078415	246		chrI	2869638	2870285	219		chrI	3681871	3682368	253		chrI	2636113	2636462	143
chrI	2639555	2640110	271		chrIII	4921929	4922324	220		chrI	2084742	2085494	253		chrI	2876330	2876850	259		chrI	3719362	3719954	205		chrI	2639555	2640110	271
chrI	2642309	2642658	155		chrIII	5031189	5031985	370		chrI	2096870	2097335	245		chrI	2927952	2928427	239		chrI	3720626	3722209	1115		chrI	2642309	2642658	155
chrI	2654480	2654858	213		chrIII	5080634	5081134	277		chrI	2126662	2127151	253		chrI	2929520	2929952	233		chrI	3723294	3723916	310		chrI	2654480	2654858	213
chrI	2655762	2656123	184		chrIII	5172429	5172862	191		chrI	2145442	2146483	772		chrI	2935503	2935970	282		chrI	3724624	3725046	192		chrI	2655762	2656123	184
chrI	2659512	2660012	222		chrIII	5210964	5211694	268		chrI	2151602	2152051	197		chrI	2995754	2996625	604		chrI	3740253	3740843	268		chrI	2659512	2660012	222
chrI	2663603	2663953	185		chrIII	5349223	5349626	217		chrI	2291015	2291431	220		chrI	3032659	3033166	256		chrI	3741062	3741501	236		chrI	2663603	2663953	185
chrI	2667801	2668213	181		chrIII	5353211	5353822	316		chrI	2312920	2313349	245		chrI	3037815	3038309	252		chrI	3754254	3754964	375		chrI	2667801	2668213	181
chrI	2678040	2678426	205		chrIII	5354984	5355595	334		chrI	2321728	2322282	240		chrI	3121649	3122247	337		chrI	3781435	3781983	389		chrI	2678040	2678426	205
chrI	2679461	2679822	195		chrIII	5601946	5602431	249		chrI	2401377	2401875	272		chrI	3147738	3148142	177		chrI	3785305	3786518	758		chrI	2679461	2679822	195
chrI	2681387	2681765	153		chrIII	5678865	5679327	221		chrI	2409952	2410339	173		chrI	3162353	3162904	286		chrI	3787566	3787984	221		chrI	2681387	2681765	153
chrI	2682823	2683339	197		chrIII	6158548	6159065	222		chrI	2421646	2422064	221		chrI	3265855	3266335	257		chrI	3806363	3806992	380		chrI	2682823	2683339	197
chrI	2688702	2689204	211		chrIII	6661612	6662024	178		chrI	2433549	2433909	193		chrI	3266504	3267042	283		chrI	3822432	3823206	435		chrI	2688702	2689204	211
chrI	2689351	2689729	164		chrIII	7444330	7447054	322		chrI	2485447	2485855	209		chrI	3297012	3297432	204		chrI	3823316	3824802	1122		chrI	2689351	2689729	164
chrI	2703115	2703528	189		chrIII	7447251	7447998	476		chrI	2514123	2514546	235		chrI	3298098	3298755	339		chrI	3829290	3830417	565		chrI	2703115	2703528	189
chrI	2727448	2727941	244		chrIII	7520561	7521013	215		chrI	2570867	2571890	354		chrI	3316445	3316939	267		chrI	3906115	3906618	240		chrI	2727448	2727941	244
chrI	2776050	2776534	192		chrIII	7595360	7595909	125		chrI	2576873	2577772	395		chrI	3334335	3334915	368		chrI	3982753	3983193	224		chrI	2776050	2776534	192
chrI	2863998	2864634	192		chrIII	7596001	7596425	251		chrI	2579945	2581374	220		chrI	3349828	3350297	243		chrI	3987048	3987518	211		chrI	2863998	2864634	192
chrI	2876341	2876963	264		chrIII	7770300	7771252	614		chrI	2585964	2586948	358		chrI	3516186	3516658	242		chrI	4004823	4006642	917		chrI	2876341	2876963	264
chrI	2927940	2928417	248		chrIII	7854433	7854817	181		chrI	2591402	2591900	246		chrI	3553237	3553620	196		chrI	4010238	4010707	221		chrI	2927940	2928417	248
chrI	2935530	2935985	205		chrIII	8307221	8307710	249		chrI	2598229	2598922	355		chrI	3600686	3601099	180		chrI	4012186	4012554	163		chrI	2935530	2935985	205
chrI	2995814	2996558	545		chrIII	8862736	8863555	362		chrI	2603545	2604397	300		chrI	3625489	3626068	241		chrI	4139219	4139716	247		chrI	2995814	2996558	545
chrI	3035869	3036249	172		chrIII	8903989	8904369	193		chrI	2605101	2605783	353		chrI	3647727	3648547	414		chrI	4171803	4172659	365		chrI	3035869	3036249	172
chrI	3037831	3038263	227		chrIII	8937448	8937964	255		chrI	2620237	2620846	268		chrI	3650538	3651126	292		chrI	4178352	4178885	248		chrI	3037831	3038263	227
chrI	3070053	3070796	209		chrIII	10224569	10225473	505		chrI	2628088	2628566	214		chrI	3681855	3682337	301		chrI	4201437	4201904	184		chrI	3070053	3070796	209
chrI	3121607	3122209	180		chrIII	10226126	10227484	252		chrI	2628736	2629748	708		chrI	3719416	3719797	184		chrI	4224783	4225345	251		chrI	3121607	3122209	180
chrI	3162449	3162896	171		chrIII	10270631	10271087	206		chrI	2635841	2636623	386		chrI	3720661	3722164	1097		chrI	4247437	4247820	197		chrI	3162449	3162896	171
chrI	3227977	3228279	136		chrIII	10758955	10759386	213		chrI	2639255	2640310	544		chrI	3723247	3723923	381		chrI	4253840	4254556	292		chrI	3227977	3228279	136
chrI	3265883	3266312	209		chrIII	10989331	10990009	253		chrI	2642244	2642736	251		chrI	3724566	3725075	234		chrI	4270326	4270807	246		chrI	3265883	3266312	209
chrI	3266449	3267004	344		chrIII	11066593	11067186	275		chrI	2654399	2654923	240		chrI	3740287	3740867	287		chrI	4297819	4298556	357		chrI	3266449	3267004	344
chrI	3295180	3295654	239		chrIII	11946200	11946651	267		chrI	2659394	2660144	503		chrI	3741058	3741509	239		chrI	4299379	4299868	251		chrI	3295180	3295654	239
chrI	3296545	3297528	653		chrIII	12904880	12905301	223		chrI	2671873	2675723	805		chrI	3754228	3754986	404		chrI	4328747	4329556	217		chrI	3296545	3297528	653
chrI	3298075	3298752	298		chrIII	13080266	13081161	626		chrI	2682806	2683340	228		chrI	3781571	3782089	261		chrI	4334381	4334768	169		chrI	3298075	3298752	298
chrI	3316521	3316942	198		chrIII	13187679	13188072	176		chrI	2688507	2691258	408		chrI	3785187	3786558	183		chrI	4381692	4382211	212		chrI	3316521	3316942	198
chrI	3330615	3331043	306		chrIII	13292877	13293217	231		chrI	2694133	2695322	758		chrI	3787462	3788059	314		chrI	4444280	4444651	174		chrI	3330615	3331043	306
chrI	3334275	3334922	425		chrIII	13296273	13296622	136		chrI	2697106	2698974	271		chrI	3806342	3807008	374		chrI	4456691	4457512	390		chrI	3334275	3334922	425
chrI	3349879	3350360	234		chrIII	13585009	13585601	275		chrI	2703076	2703961	264		chrI	3822216	3825004	2214		chrI	4459464	4460193	383		chrI	3349879	3350360	234
chrI	3425900	3426224	161		chrIII	13596392	13597352	411		chrI	2710394	2710896	310		chrI	3829252	3830905	557		chrI	4489398	4489794	196		chrI	3425900	3426224	161
chrI	3481358	3481796	203		chrIII	13598436	13598963	295		chrI	2717166	2718658	597		chrI	3906087	3906628	249		chrI	4490145	4491017	376		chrI	3481358	3481796	203
chrI	3516213	3516618	216		chrIV	192016	192526	227		chrI	2726512	2726955	221		chrI	3956510	3956948	220		chrI	4493370	4493720	154		chrI	3516213	3516618	216
chrI	3546880	3547257	162		chrIV	322420	322883	251		chrI	2727446	2727932	283		chrI	3987051	3987507	203		chrI	4493987	4494430	284		chrI	3546880	3547257	162
chrI	3625522	3625927	210		chrIV	620248	620786	317		chrI	2776016	2776548	241		chrI	4004517	4007586	1223		chrI	4496125	4497023	647		chrI	3625522	3625927	210
chrI	3647723	3648486	442		chrIV	654735	655189	182		chrI	2864050	2864593	209		chrI	4010125	4010816	319		chrI	4535772	4536490	289		chrI	3647723	3648486	442
chrI	3649235	3649721	288		chrIV	1831114	1831662	257		chrI	2869340	2870577	516		chrI	4012156	4012849	250		chrI	4546701	4547503	299		chrI	3649235	3649721	288
chrI	3650628	3651213	250		chrIV	2408395	2408872	292		chrI	2876332	2876996	292		chrI	4139168	4139719	289		chrI	4584588	4585126	260		chrI	3650628	3651213	250
chrI	3681880	3682352	224		chrIV	2639598	2640109	264		chrI	2878252	2879455	470		chrI	4171795	4172675	376		chrI	4646998	4647459	249		chrI	3681880	3682352	224
chrI	3720660	3722154	1068		chrIV	2828753	2830566	407		chrI	2894967	2895392	221		chrI	4178351	4178874	258		chrI	4650971	4652007	768		chrI	3720660	3722154	1068
chrI	3723324	3723882	245		chrIV	3206927	3208969	1005		chrI	2900952	2901310	157		chrI	4218383	4218900	267		chrI	4653644	4654468	234		chrI	3723324	3723882	245
chrI	3724572	3725054	252		chrIV	3209052	3209548	100		chrI	2927924	2928472	257		chrI	4224642	4225256	346		chrI	4671804	4672505	481		chrI	3724572	3725054	252
chrI	3740285	3740941	237		chrIV	3232842	3233651	688		chrI	2929504	2929907	241		chrI	4247352	4247817	223		chrI	4673493	4674419	493		chrI	3740285	3740941	237
chrI	3741086	3741529	205		chrIV	3313256	3313748	233		chrI	2935485	2936114	274		chrI	4253826	4254614	313		chrI	4699088	4699813	428		chrI	3741086	3741529	205
chrI	3750308	3750865	414		chrIV	4049486	4049911	217		chrI	2995808	2996567	574		chrI	4270336	4270822	249		chrI	4700992	4701841	370		chrI	3750308	3750865	414
chrI	3754243	3754991	414		chrIV	4184693	4185143	229		chrI	3032733	3033102	179		chrI	4297769	4298550	406		chrI	4769104	4770093	485		chrI	3754243	3754991	414
chrI	3759020	3759431	222		chrIV	4390430	4390845	204		chrI	3035811	3036246	214		chrI	4299184	4299896	480		chrI	4772936	4773361	256		chrI	3759020	3759431	222
chrI	3763730	3764633	343		chrIV	4416710	4417570	836		chrI	3037813	3038244	232		chrI	4311523	4311991	240		chrI	4789724	4790310	273		chrI	3763730	3764633	343
chrI	3781420	3782062	376		chrIV	4418732	4420467	428		chrI	3068577	3068849	147		chrI	4328132	4328462	211		chrI	4792435	4792865	173		chrI	3781420	3782062	376
chrI	3785222	3786511	275		chrIV	4720434	4720905	249		chrI	3069963	3070836	300		chrI	4328797	4329589	263		chrI	4804325	4804847	184		chrI	3785222	3786511	275
chrI	3787544	3788003	222		chrIV	4725363	4725832	243		chrI	3147720	3148158	210		chrI	4367749	4368147	209		chrI	4906518	4907311	252		chrI	3787544	3788003	222
chrI	3806362	3807022	397		chrIV	4727799	4728240	247		chrI	3162476	3162878	182		chrI	4436632	4437154	291		chrI	4907910	4908533	348		chrI	3806362	3807022	397
chrI	3822254	3823185	571		chrIV	4749836	4750274	248		chrI	3176330	3176852	281		chrI	4444262	4444682	200		chrI	4911623	4912137	289		chrI	3822254	3823185	571
chrI	3823342	3824959	1050		chrIV	6321719	6322101	190		chrI	3222805	3223304	290		chrI	4456333	4458168	859		chrI	4914103	4915460	403		chrI	3823342	3824959	1050
chrI	3829164	3830854	631		chrIV	6469186	6469762	97		chrI	3227917	3228319	193		chrI	4459454	4460288	277		chrI	4915784	4916721	660		chrI	3829164	3830854	631
chrI	3906148	3906637	246		chrIV	7573867	7574365	205		chrI	3240267	3242392	882		chrI	4489311	4489827	277		chrI	4917342	4918031	229		chrI	3906148	3906637	246
chrI	3930395	3930767	205		chrIV	8375300	8375798	278		chrI	3255750	3256459	476		chrI	4490109	4491041	480		chrI	4926308	4926817	246		chrI	3930395	3930767	205
chrI	3987088	3987487	188		chrIV	8431361	8432109	544		chrI	3265782	3267034	1012		chrI	4493877	4494409	265		chrI	4932833	4933226	193		chrI	3987088	3987487	188
chrI	3990073	3990673	274		chrIV	9046976	9047676	283		chrI	3291099	3293824	1646		chrI	4496183	4497192	484		chrI	4940968	4941607	251		chrI	3990073	3990673	274
chrI	4004563	4006657	1137		chrIV	9048169	9048687	256		chrI	3294881	3297659	2365		chrI	4535771	4536593	315		chrI	4958686	4959311	182		chrI	4004563	4006657	1137
chrI	4006890	4007492	356		chrIV	9196152	9196574	238		chrI	3297908	3300076	463		chrI	4584607	4585104	245		chrI	4967388	4967726	231		chrI	4006890	4007492	356
chrI	4008806	4009218	234		chrIV	10943473	10944116	230		chrI	3300220	3302591	1252		chrI	4644201	4644639	218		chrI	4974475	4975040	342		chrI	4008806	4009218	234
chrI	4009572	4009971	222		chrIV	11071146	11072717	901		chrI	3316403	3317165	314		chrI	4647027	4647468	226		chrI	5009839	5010306	223		chrI	4009572	4009971	222
chrI	4010162	4010694	218		chrIV	11072815	11075684	277		chrI	3317574	3319720	977		chrI	4651548	4651998	214		chrI	5056848	5057249	150		chrI	4010162	4010694	218
chrI	4032325	4033011	285		chrIV	11549606	11550113	247		chrI	3330637	3331035	176		chrI	4653610	4654444	540		chrI	5082255	5082660	219		chrI	4032325	4033011	285
chrI	4035298	4035706	195		chrIV	12023012	12023415	271		chrI	3334336	3334866	388		chrI	4671751	4672587	535		chrI	5130626	5131699	368		chrI	4035298	4035706	195
chrI	4139308	4139764	166		chrIV	12314531	12315095	281		chrI	3349789	3350548	297		chrI	4673457	4674389	481		chrI	5140084	5140748	326		chrI	4139308	4139764	166
chrI	4171879	4172635	317		chrIV	12316618	12318687	391		chrI	3409689	3410130	206		chrI	4699078	4699851	405		chrI	5164846	5165248	183		chrI	4171879	4172635	317
chrI	4178414	4178859	192		chrIV	12417732	12418166	225		chrI	3412282	3412692	170		chrI	4701023	4701860	384		chrI	5176128	5176691	306		chrI	4178414	4178859	192
chrI	4215638	4215999	213		chrIV	12594553	12594984	176		chrI	3438714	3439197	242		chrI	4702456	4702795	159		chrI	5244096	5244497	182		chrI	4215638	4215999	213
chrI	4218476	4218936	377		chrIV	13360557	13361958	1048		chrI	3466701	3467045	175		chrI	4703032	4703569	246		chrI	5311419	5312306	484		chrI	4218476	4218936	377
chrI	4224809	4225301	254		chrIV	14033102	14034506	944		chrI	3481389	3481812	160		chrI	4769097	4770258	512		chrI	5312629	5313745	501		chrI	4224809	4225301	254
chrI	4253845	4254507	239		chrIV	14779735	14780409	340		chrI	3501151	3501510	227		chrI	4772882	4773435	265		chrI	5314565	5315009	201		chrI	4253845	4254507	239
chrI	4270335	4270780	221		chrIV	15526485	15526850	165		chrI	3516234	3516719	211		chrI	4777864	4778229	150		chrI	5315756	5317034	735		chrI	4270335	4270780	221
chrI	4297762	4298543	420		chrIV	15530469	15530919	235		chrI	3546756	3547283	311		chrI	4789715	4790317	305		chrI	5353758	5354063	196		chrI	4297762	4298543	420
chrI	4298981	4299906	702		chrIV	15646433	15646982	285		chrI	3600700	3601118	222		chrI	4792445	4792853	171		chrI	5357351	5357839	229		chrI	4298981	4299906	702
chrI	4328817	4329613	213		chrIV	16400738	16401174	301		chrI	3605567	3606041	247		chrI	4794110	4794494	193		chrI	5372226	5373784	521		chrI	4328817	4329613	213
chrI	4330635	4331039	183		chrIV	16415091	16415975	640		chrI	3625534	3625900	150		chrI	4805265	4805689	240		chrI	5374393	5375987	1136		chrI	4330635	4331039	183
chrI	4367759	4368162	180		chrIV	16845341	16845833	241		chrI	3636412	3636942	260		chrI	4905654	4906234	175		chrI	5376116	5376722	323		chrI	4367759	4368162	180
chrI	4381734	4382565	163		chrM	3	13793	4585		chrI	3638734	3639114	186		chrI	4906462	4907128	337		chrI	5376826	5378270	951		chrI	4381734	4382565	163
chrI	4433067	4433433	227		chrV	265057	266236	293		chrI	3647880	3648539	281		chrI	4907789	4908706	466		chrI	5378368	5378918	244		chrI	4433067	4433433	227
chrI	4436670	4437044	207		chrV	266353	267048	585		chrI	3650568	3651209	316		chrI	4911396	4912096	469		chrI	5379414	5380336	546		chrI	4436670	4437044	207
chrI	4444274	4444638	209		chrV	723632	725508	466		chrI	3684410	3684939	302		chrI	4914112	4916799	311		chrI	5383429	5383872	249		chrI	4444274	4444638	209
chrI	4455544	4460271	1353		chrV	1151260	1151974	241		chrI	3697727	3698457	339		chrI	4917306	4918433	489		chrI	5388488	5389358	587		chrI	4455544	4460271	1353
chrI	4475089	4475567	175		chrV	1833080	1833585	240		chrI	3702872	3703507	310		chrI	4926330	4926821	249		chrI	5400109	5400677	326		chrI	4475089	4475567	175
chrI	4484907	4485389	230		chrV	1838396	1838966	304		chrI	3721086	3722179	645		chrI	4940985	4941608	293		chrI	5420293	5420704	210		chrI	4484907	4485389	230
chrI	4490196	4491007	349		chrV	2890625	2891182	295		chrI	3723350	3727191	280		chrI	4967385	4967762	202		chrI	5429664	5430180	253		chrI	4490196	4491007	349
chrI	4493980	4494418	245		chrV	3434635	3441147	817		chrI	3731041	3734276	1762		chrI	4974478	4975412	245		chrI	5539896	5540289	227		chrI	4493980	4494418	245
chrI	4496238	4497071	586		chrV	4028862	4029368	288		chrI	3740247	3741750	1031		chrI	5009868	5010298	248		chrI	5540560	5541125	296		chrI	4496238	4497071	586
chrI	4511032	4511450	214		chrV	4333525	4334406	583		chrI	3744071	3745883	316		chrI	5033190	5033611	248		chrI	5543735	5544276	258		chrI	4511032	4511450	214
chrI	4535790	4536464	331		chrV	4334507	4335831	1137		chrI	3754450	3755024	195		chrI	5056750	5057235	290		chrI	5545573	5546011	192		chrI	4535790	4536464	331
chrI	4544048	4546430	1795		chrV	5049247	5049879	252		chrI	3758932	3759584	259		chrI	5082232	5082680	218		chrI	5589517	5589945	220		chrI	4544048	4546430	1795
chrI	4546549	4547704	631		chrV	5073938	5074717	349		chrI	3781284	3782192	523		chrI	5104723	5105194	273		chrI	5599356	5599855	265		chrI	4546549	4547704	631
chrI	4573157	4573971	379		chrV	5283246	5284355	718		chrI	3785086	3786340	316		chrI	5127468	5127876	185		chrI	5608839	5609300	187		chrI	4573157	4573971	379
chrI	4584664	4585044	198		chrV	5284495	5285685	850		chrI	3787512	3788157	287		chrI	5130644	5131636	315		chrI	5618272	5618721	255		chrI	4584664	4585044	198
chrI	4602906	4603264	143		chrV	5778074	5778542	245		chrI	3793218	3793835	281		chrI	5139981	5140768	363		chrI	5637710	5638220	247		chrI	4602906	4603264	143
chrI	4633463	4633876	213		chrV	6888767	6889292	266		chrI	3806253	3807049	471		chrI	5164807	5165248	220		chrI	5639115	5639581	230		chrI	4633463	4633876	213
chrI	4644188	4644656	232		chrV	7443229	7444752	278		chrI	3817574	3818147	338		chrI	5175655	5176658	776		chrI	5653496	5653862	192		chrI	4644188	4644656	232
chrI	4647041	4647449	198		chrV	7918774	7919379	495		chrI	3822243	3823138	574		chrI	5244050	5244493	221		chrI	5677988	5678485	231		chrI	4647041	4647449	198
chrI	4651651	4652002	218		chrV	7990059	7991225	415		chrI	3824076	3824998	348		chrI	5308087	5308617	254		chrI	5691528	5692024	225		chrI	4651651	4652002	218
chrI	4653628	4654399	282		chrV	8348928	8349360	171		chrI	3826354	3826971	307		chrI	5311018	5314006	2104		chrI	5698800	5699424	330		chrI	4653628	4654399	282
chrI	4671777	4672883	537		chrV	8431277	8431678	154		chrI	3829254	3830521	541		chrI	5314492	5315115	289		chrI	5706761	5707276	254		chrI	4671777	4672883	537
chrI	4673567	4674400	399		chrV	9087778	9088612	459		chrI	3833618	3834756	644		chrI	5315591	5317071	919		chrI	5807228	5807793	283		chrI	4673567	4674400	399
chrI	4699115	4699832	369		chrV	9338854	9339592	288		chrI	3835007	3835769	448		chrI	5353758	5354154	190		chrI	5831144	5831480	148		chrI	4699115	4699832	369
chrI	4700273	4700716	312		chrV	9340814	9344470	3466		chrI	3837143	3838086	645		chrI	5357301	5357789	244		chrI	5865881	5866247	175		chrI	4700273	4700716	312
chrI	4700972	4701919	384		chrV	9429490	9430412	829		chrI	3842350	3842878	326		chrI	5372138	5373343	440		chrI	5870444	5871034	281		chrI	4700972	4701919	384
chrI	4702414	4702795	159		chrV	9433742	9434208	140		chrI	3873813	3874180	155		chrI	5374445	5380310	5464		chrI	5879257	5879961	219		chrI	4702414	4702795	159
chrI	4703035	4703584	242		chrV	9503317	9503815	212		chrI	3876762	3877156	213		chrI	5388482	5389362	710		chrI	5936895	5937317	212		chrI	4703035	4703584	242
chrI	4765626	4766049	235		chrV	9546784	9547244	223		chrI	3908386	3908833	230		chrI	5400102	5400681	331		chrI	5973434	5973992	201		chrI	4765626	4766049	235
chrI	4767752	4768209	192		chrV	9970063	9970506	235		chrI	3910406	3910855	330		chrI	5412258	5412840	355		chrI	5986131	5986622	243		chrI	4767752	4768209	192
chrI	4769133	4770154	493		chrV	9980761	9981132	240		chrI	3982744	3983132	218		chrI	5420274	5420733	207		chrI	5997340	5997801	262		chrI	4769133	4770154	493
chrI	4772813	4773405	353		chrV	10320132	10320578	177		chrI	3987016	3987535	258		chrI	5429632	5430165	303		chrI	6001031	6001451	235		chrI	4772813	4773405	353
chrI	4789754	4790267	265		chrV	10341892	10342226	149		chrI	3990095	3990685	258		chrI	5539913	5541127	937		chrI	6011706	6012150	194		chrI	4789754	4790267	265
chrI	4792397	4792859	247		chrV	10605718	10606756	424		chrI	3992061	3992835	517		chrI	5543640	5544354	363		chrI	6060977	6061450	246		chrI	4792397	4792859	247
chrI	4794116	4794431	183		chrV	10607020	10609822	369		chrI	3993426	3993910	247		chrI	5545511	5546025	223		chrI	6074869	6075335	223		chrI	4794116	4794431	183
chrI	4804390	4805057	173		chrV	10897118	10897580	245		chrI	3994365	3994913	256		chrI	5586316	5586688	185		chrI	6076236	6076697	250		chrI	4804390	4805057	173
chrI	4805284	4805668	210		chrV	11313978	11314512	258		chrI	3999386	4000638	209		chrI	5589431	5589983	309		chrI	6082609	6083053	255		chrI	4805284	4805668	210
chrI	4840902	4841201	142		chrV	11504882	11505222	133		chrI	4000725	4002326	525		chrI	5599354	5599841	208		chrI	6090895	6093225	846		chrI	4840902	4841201	142
chrI	4847874	4848306	241		chrV	11782654	11783221	279		chrI	4005150	4006113	574		chrI	5608851	5609278	172		chrI	6093579	6095053	1051		chrI	4847874	4848306	241
chrI	4900780	4901268	212		chrV	11979900	11980387	164		chrI	4032420	4032968	195		chrI	5637609	5638238	344		chrI	6103003	6103553	230		chrI	4900780	4901268	212
chrI	4905581	4906148	215		chrV	12303345	12303957	285		chrI	4035276	4035747	241		chrI	5653484	5653902	199		chrI	6105554	6106014	262		chrI	4905581	4906148	215
chrI	4906478	4906997	298		chrV	12551348	12552242	356		chrI	4132072	4132541	269		chrI	5677905	5678504	278		chrI	6117964	6118554	264		chrI	4906478	4906997	298
chrI	4907908	4908502	332		chrV	12869885	12870335	234		chrI	4139239	4139723	205		chrI	5691513	5691996	258		chrI	6163145	6163877	390		chrI	4907908	4908502	332
chrI	4911432	4912018	249		chrV	13468137	13468648	251		chrI	4171726	4172653	443		chrI	5698854	5699370	281		chrI	6164037	6164531	238		chrI	4911432	4912018	249
chrI	4914105	4914675	295		chrV	13908615	13909510	618		chrI	4175731	4176203	236		chrI	5706723	5707278	251		chrI	6166623	6167048	190		chrI	4914105	4914675	295
chrI	4914834	4915252	185		chrV	14038515	14039046	285		chrI	4178412	4178828	186		chrI	5807173	5807790	320		chrI	6174802	6175470	367		chrI	4914834	4915252	185
chrI	4915774	4916811	616		chrV	14054852	14055457	318		chrI	4210577	4211071	239		chrI	5865857	5866330	189		chrI	6198458	6198993	151		chrI	4915774	4916811	616
chrI	4917329	4918033	471		chrV	14685540	14685967	205		chrI	4215584	4216027	222		chrI	5870457	5871072	283		chrI	6212638	6213074	245		chrI	4917329	4918033	471
chrI	4926332	4926808	248		chrV	14768332	14769574	267		chrI	4242302	4242771	271		chrI	5936876	5937275	197		chrI	6220777	6221230	245		chrI	4926332	4926808	248
chrI	4932766	4933441	270		chrV	15085422	15085785	176		chrI	4247379	4247825	235		chrI	5971832	5972259	188		chrI	6260143	6260564	202		chrI	4932766	4933441	270
chrI	4940985	4941539	295		chrV	15464935	15465392	250		chrI	4253894	4254493	283		chrI	5973421	5973933	277		chrI	6280220	6280655	164		chrI	4940985	4941539	295
chrI	4958845	4959343	351		chrV	15590165	15590593	197		chrI	4270335	4270844	240		chrI	5986113	5986636	252		chrI	6284594	6284979	191		chrI	4958845	4959343	351
chrI	4967358	4967874	217		chrV	15873678	15874140	237		chrI	4294323	4296683	1187		chrI	5997347	5997896	282		chrI	6289968	6290403	198		chrI	4967358	4967874	217
chrI	4974528	4975337	289		chrV	16401564	16401933	123		chrI	4297544	4298590	613		chrI	6001012	6001485	256		chrI	6293978	6294338	197		chrI	4974528	4975337	289
chrI	5009810	5010357	259		chrV	16707883	16709318	506		chrI	4299034	4299771	578		chrI	6011701	6012162	215		chrI	6314672	6315148	235		chrI	5009810	5010357	259
chrI	5015680	5016011	202		chrV	17115500	17116111	295		chrI	4302210	4302627	205		chrI	6038106	6038433	149		chrI	6317627	6318183	272		chrI	5015680	5016011	202
chrI	5020020	5020403	204		chrV	17117828	17118876	645		chrI	4311578	4312015	204		chrI	6060973	6061473	312		chrI	6336775	6337173	216		chrI	5020020	5020403	204
chrI	5025172	5025846	424		chrV	17119993	17126560	900		chrI	4320692	4321104	185		chrI	6074900	6075328	197		chrI	6339967	6340520	231		chrI	5025172	5025846	424
chrI	5033190	5033613	211		chrV	17128212	17132133	3028		chrI	4340835	4349330	4144		chrI	6076294	6076696	172		chrI	6358429	6358841	179		chrI	5033190	5033613	211
chrI	5056775	5057275	250		chrV	17308626	17308940	238		chrI	4349435	4352198	1482		chrI	6082608	6083108	222		chrI	6380812	6381188	153		chrI	5056775	5057275	250
chrI	5082266	5082665	207		chrV	17309022	17311484	2106		chrI	4352314	4357573	1470		chrI	6090909	6093270	233		chrI	6394207	6394607	164		chrI	5082266	5082665	207
chrI	5104743	5105137	228		chrV	17384437	17385171	238		chrI	4358911	4359928	386		chrI	6103038	6103520	240		chrI	6397949	6398505	292		chrI	5104743	5105137	228
chrI	5130701	5131658	202		chrV	17519233	17519560	85		chrI	4367566	4368279	374		chrI	6105566	6106038	229		chrI	6407200	6407594	204		chrI	5130701	5131658	202
chrI	5140055	5140813	283		chrV	18637970	18638440	176		chrI	4381679	4382582	222		chrI	6117880	6118539	320		chrI	6434392	6434794	186		chrI	5140055	5140813	283
chrI	5164861	5165222	168		chrV	18727679	18728425	482		chrI	4428089	4428742	241		chrI	6164129	6164545	199		chrI	6435462	6436443	432		chrI	5164861	5165222	168
chrI	5176223	5176629	213		chrV	18887815	18888291	232		chrI	4444246	4444701	226		chrI	6166632	6167050	190		chrI	6436746	6437919	694		chrI	5176223	5176629	213
chrI	5244076	5244493	220		chrV	19642894	19643436	282		chrI	4450878	4451367	257		chrI	6174799	6175543	386		chrI	6446431	6447135	247		chrI	5244076	5244493	220
chrI	5261620	5261991	146		chrV	19770743	19771102	247		chrI	4456681	4457489	567		chrI	6198452	6199111	466		chrI	6459346	6459966	298		chrI	5261620	5261991	146
chrI	5281656	5282101	208		chrV	19933358	19934071	343		chrI	4459434	4460235	277		chrI	6212601	6213100	259		chrI	6493814	6494217	168		chrI	5281656	5282101	208
chrI	5291765	5292133	189		chrX	0	401	171		chrI	4490260	4490798	310		chrI	6215344	6215782	209		chrI	6531886	6532299	230		chrI	5291765	5292133	189
chrI	5311444	5313616	1753		chrX	109579	114226	2505		chrI	4510891	4511590	378		chrI	6220765	6221268	241		chrI	6541861	6542235	184		chrI	5311444	5313616	1753
chrI	5314596	5315101	233		chrX	290019	291728	502		chrI	4516017	4516584	297		chrI	6224579	6224994	213		chrI	6554463	6554929	212		chrI	5314596	5315101	233
chrI	5315644	5317051	876		chrX	291984	295248	1375		chrI	4535867	4536654	250		chrI	6260223	6260627	195		chrI	6564363	6564885	255		chrI	5315644	5317051	876
chrI	5319136	5319594	178		chrX	330270	330738	178		chrI	4584687	4585037	175		chrI	6280256	6280578	144		chrI	6569129	6569650	285		chrI	5319136	5319594	178
chrI	5353755	5354195	194		chrX	410110	410642	206		chrI	4602810	4603276	227		chrI	6283314	6284001	480		chrI	6574066	6574979	659		chrI	5353755	5354195	194
chrI	5357330	5357847	197		chrX	489658	490111	270		chrI	4633414	4633933	259		chrI	6284612	6285039	234		chrI	6579711	6580236	240		chrI	5357330	5357847	197
chrI	5372248	5373233	329		chrX	1389194	1389853	427		chrI	4644135	4644668	267		chrI	6289939	6290351	236		chrI	6581625	6582142	249		chrI	5372248	5373233	329
chrI	5375200	5376010	284		chrX	1503281	1505078	1241		chrI	4647025	4647470	229		chrI	6293988	6294382	166		chrI	6582613	6583080	213		chrI	5375200	5376010	284
chrI	5376858	5378223	858		chrX	1636174	1637650	777		chrI	4653734	4654366	287		chrI	6314680	6315144	232		chrI	6607771	6608630	350		chrI	5376858	5378223	858
chrI	5378411	5378833	246		chrX	1752298	1755119	1037		chrI	4660013	4660708	232		chrI	6317616	6318169	288		chrI	6637245	6637704	261		chrI	5378411	5378833	246
chrI	5379511	5380341	421		chrX	2527819	2528273	215		chrI	4662357	4662990	265		chrI	6336799	6337210	212		chrI	6676945	6677447	256		chrI	5379511	5380341	421
chrI	5383407	5383822	205		chrX	2549276	2549746	283		chrI	4665275	4666009	313		chrI	6339935	6340421	239		chrI	6692759	6693141	169		chrI	5383407	5383822	205
chrI	5388504	5389344	618		chrX	2996367	2997509	746		chrI	4671715	4672549	548		chrI	6358406	6358801	223		chrI	6723044	6723568	208		chrI	5388504	5389344	618
chrI	5400128	5400724	303		chrX	3035782	3036413	325		chrI	4673717	4674360	238		chrI	6364671	6365062	193		chrI	6724166	6724724	281		chrI	5400128	5400724	303
chrI	5410717	5411125	191		chrX	3371073	3371640	355		chrI	4679105	4680526	556		chrI	6394167	6394544	180		chrI	6745354	6745726	205		chrI	5410717	5411125	191
chrI	5412386	5412805	218		chrX	3697537	3697987	214		chrI	4681579	4683549	1261		chrI	6397955	6398508	325		chrI	6756973	6757529	308		chrI	5412386	5412805	218
chrI	5416237	5416708	201		chrX	3969842	3970341	245		chrI	4683639	4684834	180		chrI	6434455	6434864	167		chrI	6780045	6780459	176		chrI	5416237	5416708	201
chrI	5420304	5420981	222		chrX	4208436	4209694	821		chrI	4685179	4686276	544		chrI	6435486	6436484	414		chrI	6781556	6782056	233		chrI	5420304	5420981	222
chrI	5429691	5430163	244		chrX	5056302	5057231	486		chrI	4699139	4699766	358		chrI	6436771	6437810	636		chrI	6789921	6790371	238		chrI	5429691	5430163	244
chrI	5485803	5486240	223		chrX	5085307	5085898	330		chrI	4701140	4701798	280		chrI	6446458	6447262	235		chrI	6799435	6799928	226		chrI	5485803	5486240	223
chrI	5509159	5509506	209		chrX	5429180	5429988	292		chrI	4703021	4703554	286		chrI	6459383	6460153	285		chrI	6810287	6810755	232		chrI	5509159	5509506	209
chrI	5539883	5540390	232		chrX	5800974	5801682	334		chrI	4704231	4704685	241		chrI	6460629	6461013	244		chrI	6828366	6828838	263		chrI	5539883	5540390	232
chrI	5540633	5541082	228		chrX	6207487	6208107	341		chrI	4720967	4721409	209		chrI	6493821	6494251	183		chrI	6834811	6836477	606		chrI	5540633	5541082	228
chrI	5542751	5543076	162		chrX	6219829	6220320	262		chrI	4754973	4755302	139		chrI	6531909	6532345	217		chrI	6949087	6949753	346		chrI	5542751	5543076	162
chrI	5543733	5544251	340		chrX	6296142	6296826	350		chrI	4765513	4766084	358		chrI	6541850	6542313	235		chrI	6965460	6965988	253		chrI	5543733	5544251	340
chrI	5545491	5545918	231		chrX	6741880	6744532	2453		chrI	4767697	4768194	225		chrI	6554424	6554924	255		chrI	6970095	6970467	182		chrI	5545491	5545918	231
chrI	5579391	5579734	157		chrX	6902911	6903314	205		chrI	4769095	4770250	528		chrI	6564328	6564869	291		chrI	6995873	6996305	251		chrI	5579391	5579734	157
chrI	5586359	5586696	152		chrX	7077642	7078319	228		chrI	4772785	4773413	354		chrI	6569128	6569762	289		chrI	7020876	7022059	585		chrI	5586359	5586696	152
chrI	5589491	5589921	211		chrX	7794137	7794874	392		chrI	4789772	4790298	214		chrI	6572620	6573163	205		chrI	7054637	7054981	191		chrI	5589491	5589921	211
chrI	5599354	5599826	235		chrX	8036032	8036951	368		chrI	4804302	4805808	1189		chrI	6573979	6575141	359		chrI	7056736	7057358	281		chrI	5599354	5599826	235
chrI	5601313	5601707	133		chrX	8154364	8154837	228		chrI	4829716	4830225	230		chrI	6579698	6580267	225		chrI	7058969	7059603	408		chrI	5601313	5601707	133
chrI	5608833	5609393	243		chrX	8386002	8386675	200		chrI	4847759	4848483	425		chrI	6581568	6582064	267		chrI	7078874	7085403	3413		chrI	5608833	5609393	243
chrI	5618371	5618740	150		chrX	8404224	8404799	211		chrI	4895125	4896879	1337		chrI	6607760	6608620	328		chrI	7087174	7087900	368		chrI	5618371	5618740	150
chrI	5637673	5638187	291		chrX	8608556	8609128	252		chrI	4900704	4901369	279		chrI	6611192	6611573	211		chrI	7090230	7090565	218		chrI	5637673	5638187	291
chrI	5639102	5639584	238		chrX	8835795	8836308	233		chrI	4905554	4906328	174		chrI	6637234	6637721	284		chrI	7098066	7098589	241		chrI	5639102	5639584	238
chrI	5653489	5653908	202		chrX	9091227	9091783	285		chrI	4906408	4907192	387		chrI	6638738	6639133	199		chrI	7099557	7099972	210		chrI	5653489	5653908	202
chrI	5677922	5678477	266		chrX	9185947	9186913	289		chrI	4907889	4908465	349		chrI	6723021	6723557	251		chrI	7125445	7126061	286		chrI	5677922	5678477	266
chrI	5691525	5692015	231		chrX	9188048	9188665	331		chrI	4911270	4912102	410		chrI	6724154	6724761	281		chrI	7128022	7128605	332		chrI	5691525	5692015	231
chrI	5698862	5699424	245		chrX	9465404	9466075	383		chrI	4917535	4918406	313		chrI	6745315	6745737	239		chrI	7129392	7129785	224		chrI	5698862	5699424	245
chrI	5706828	5707221	199		chrX	9467423	9467961	257		chrI	4920449	4921861	800		chrI	6756309	6756810	287		chrI	7147494	7148145	363		chrI	5706828	5707221	199
chrI	5807207	5807741	270		chrX	9637600	9637996	225		chrI	4926163	4926831	425		chrI	6756957	6757531	255		chrI	7149501	7149865	197		chrI	5807207	5807741	270
chrI	5826582	5827662	206		chrX	9743315	9743901	309		chrI	4932785	4933424	255		chrI	6760088	6760566	247		chrI	7213366	7214009	361		chrI	5826582	5827662	206
chrI	5828848	5829208	216		chrX	10144914	10145452	197		chrI	4949041	4950405	704		chrI	6780009	6780458	234		chrI	7251450	7251898	236		chrI	5828848	5829208	216
chrI	5865895	5866219	127		chrX	10361027	10361654	227		chrI	4958147	4959345	210		chrI	6781551	6782041	233		chrI	7283611	7284063	226		chrI	5865895	5866219	127
chrI	5870466	5870994	236		chrX	10364084	10365055	756		chrI	4967244	4967925	329		chrI	6789916	6790425	272		chrI	7314249	7314731	256		chrI	5870466	5870994	236
chrI	5936924	5937291	194		chrX	10366760	10367382	250		chrI	4974240	4975073	631		chrI	6799411	6799941	261		chrI	7321447	7321916	252		chrI	5936924	5937291	194
chrI	5971816	5972252	202		chrX	10368165	10368967	567		chrI	5015586	5016053	271		chrI	6806077	6806987	280		chrI	7325831	7326390	223		chrI	5971816	5972252	202
chrI	5973485	5974053	245		chrX	10667108	10667995	545		chrI	5020021	5020515	231		chrI	6810141	6810816	413		chrI	7331833	7332261	244		chrI	5973485	5974053	245
chrI	5986173	5986598	222		chrX	10766053	10766523	164		chrI	5025222	5025786	305		chrI	6828187	6828823	433		chrI	7340869	7341428	272		chrI	5986173	5986598	222
chrI	5997387	5997795	208		chrX	10821090	10821529	244		chrI	5041035	5041677	235		chrI	6834784	6836154	563		chrI	7342224	7343315	498		chrI	5997387	5997795	208
chrI	5999134	5999556	242		chrX	10963535	10964059	232		chrI	5056828	5057239	205		chrI	6945584	6945953	162		chrI	7365097	7365854	593		chrI	5999134	5999556	242
chrI	6001062	6001486	188		chrX	11093790	11094509	306		chrI	5082235	5082708	212		chrI	6949110	6949751	352		chrI	7366097	7366883	527		chrI	6001062	6001486	188
chrI	6011661	6012141	265		chrX	11473123	11473542	266		chrI	5105997	5106419	203		chrI	6965469	6965965	249		chrI	7367056	7367530	242		chrI	6011661	6012141	265
chrI	6038035	6038490	278		chrX	11605381	11606406	521		chrI	5118734	5119182	241		chrI	6970099	6970452	191		chrI	7367953	7369842	434		chrI	6038035	6038490	278
chrI	6060989	6061544	203		chrX	11757526	11758011	288		chrI	5127427	5127889	225		chrI	6995555	6996317	562		chrI	7370082	7370689	261		chrI	6060989	6061544	203
chrI	6079435	6079947	317		chrX	11786400	11787736	742		chrI	5140113	5140665	252		chrI	7005388	7005766	201		chrI	7374684	7375159	260		chrI	6079435	6079947	317
chrI	6082660	6083014	179		chrX	11788196	11789274	769		chrI	5164820	5165249	217		chrI	7021010	7021990	435		chrI	7375753	7376167	246		chrI	6082660	6083014	179
chrI	6090945	6093169	839		chrX	11886547	11888228	1033		chrI	5176192	5176624	233		chrI	7031313	7031752	186		chrI	7392017	7392487	238		chrI	6090945	6093169	839
chrI	6094344	6094865	181		chrX	11937144	11937752	355		chrI	5244031	5244559	231		chrI	7033080	7033570	242		chrI	7404651	7405122	214		chrI	6094344	6094865	181
chrI	6103024	6103494	230		chrX	12105919	12106366	223		chrI	5261548	5262038	229		chrI	7036741	7037251	233		chrI	7421153	7421696	365		chrI	6103024	6103494	230
chrI	6105582	6105990	175		chrX	12278071	12278662	68		chrI	5272440	5272936	284		chrI	7039533	7040034	263		chrI	7472209	7472856	246		chrI	6105582	6105990	175
chrI	6117971	6118500	254		chrX	12362777	12363552	344		chrI	5281383	5282238	484		chrI	7040654	7041170	236		chrI	7474545	7475962	805		chrI	6117971	6118500	254
chrI	6154079	6154430	207		chrX	12563507	12563971	212		chrI	5283438	5284423	444		chrI	7043211	7043523	154		chrI	7476796	7477245	228		chrI	6154079	6154430	207
chrI	6163264	6163731	234		chrX	12664934	12665444	229		chrI	5291566	5292223	365		chrI	7048392	7048811	183		chrI	7479177	7479580	260		chrI	6163264	6163731	234
chrI	6166701	6167071	160		chrX	12889675	12890371	380		chrI	5294100	5294923	515		chrI	7056834	7057298	182		chrI	7480071	7480493	240		chrI	6166701	6167071	160
chrI	6174827	6175492	319		chrX	13046173	13046784	233		chrI	5297502	5298548	754		chrI	7059128	7059666	270		chrI	7489836	7490568	482		chrI	6174827	6175492	319
chrI	6198461	6199123	165		chrX	13144213	13145419	1005		chrI	5300234	5302343	527		chrI	7078793	7085381	3577		chrI	7491663	7493397	434		chrI	6198461	6199123	165
chrI	6210760	6211175	191		chrX	13306763	13307286	258		chrI	5307813	5308678	475		chrI	7086795	7087994	709		chrI	7494150	7495017	286		chrI	6210760	6211175	191
chrI	6212672	6213015	205		chrX	13448536	13449098	219		chrI	5311389	5312449	493		chrI	7090165	7090602	273		chrI	7500128	7500938	391		chrI	6212672	6213015	205
chrI	6215421	6215773	143		chrX	13511702	13512189	242		chrI	5312652	5313616	432		chrI	7094821	7095255	229		chrI	7515638	7516234	284		chrI	6215421	6215773	143
chrI	6220820	6221203	191		chrX	13665311	13665770	216		chrI	5315738	5317589	806		chrI	7098094	7098559	239		chrI	7518101	7519222	451		chrI	6220820	6221203	191
chrI	6238341	6238747	179		chrX	14063688	14064159	255		chrI	5318804	5319954	597		chrI	7099530	7099973	251		chrI	7542101	7542594	205		chrI	6238341	6238747	179
chrI	6252788	6253168	173		chrX	14525396	14526263	514		chrI	5320454	5326266	1875		chrI	7125375	7126142	355		chrI	7544515	7544952	208		chrI	6252788	6253168	173
chrI	6259117	6259506	186		chrX	14908075	14908645	297		chrI	5344207	5344696	247		chrI	7128003	7128642	346		chrI	7547770	7548574	463		chrI	6259117	6259506	186
chrI	6260170	6260619	238		chrX	15188952	15189598	176		chrI	5353664	5354167	269		chrI	7147390	7148137	417		chrI	7562992	7563508	283		chrI	6260170	6260619	238
chrI	6280220	6280689	228		chrX	15200584	15201142	281		chrI	5357292	5357831	291		chrI	7149501	7149967	225		chrI	7570862	7571554	368		chrI	6280220	6280689	228
chrI	6283565	6284012	200		chrX	15226991	15228186	414		chrI	5368593	5370006	534		chrI	7159140	7159551	203		chrI	7573720	7574331	281		chrI	6283565	6284012	200
chrI	6284623	6285026	168		chrX	15807609	15811190	3186		chrI	5371561	5373670	1095		chrI	7216217	7217677	1271		chrI	7575167	7575845	361		chrI	6284623	6285026	168
chrI	6290028	6290375	164		chrX	16056044	16056886	451		chrI	5375274	5375745	274		chrI	7251435	7251832	242		chrI	7595343	7596182	327		chrI	6290028	6290375	164
chrI	6293932	6294414	202		chrX	16759077	16759912	251		chrI	5377172	5378181	485		chrI	7283591	7284065	233		chrI	7596397	7597549	784		chrI	6293932	6294414	202
chrI	6314700	6315117	196		chrX	16929495	16933523	630		chrI	5379562	5380275	400		chrI	7314245	7314767	273		chrI	7656309	7660784	2592		chrI	6314700	6315117	196
chrI	6317663	6318159	217		chrX	16935226	16935834	400		chrI	5394697	5395060	231		chrI	7321414	7321920	240		chrI	7660887	7661476	328		chrI	6317663	6318159	217
chrI	6336786	6337171	189		chrX	17419612	17420051	192		chrI	5400099	5402149	422		chrI	7325896	7326368	224		chrI	7661902	7662536	352		chrI	6336786	6337171	189
chrI	6339904	6340500	270							chrI	5412437	5412858	198		chrI	7331859	7332248	159		chrI	7700880	7701319	185		chrI	6339904	6340500	270
chrI	6341656	6342136	282							chrI	5416040	5416654	429		chrI	7340182	7341399	893		chrI	7708223	7708647	268		chrI	6341656	6342136	282
chrI	6358420	6358791	194							chrI	5420313	5421192	204		chrI	7342384	7343423	259		chrI	7709299	7710101	212		chrI	6358420	6358791	194
chrI	6364675	6365044	201							chrI	5429638	5430181	283		chrI	7347329	7347710	101		chrI	7712487	7713132	314		chrI	6364675	6365044	201
chrI	6366192	6366528	157							chrI	5485814	5486129	177		chrI	7361631	7362282	218		chrI	7715684	7716224	327		chrI	6366192	6366528	157
chrI	6394183	6394640	209							chrI	5509140	5509503	207		chrI	7363440	7363992	287		chrI	7724546	7725010	223		chrI	6394183	6394640	209
chrI	6394765	6395051	56							chrI	5550356	5550806	278		chrI	7364310	7364815	263		chrI	7747360	7748062	228		chrI	6394765	6395051	56
chrI	6397949	6398469	282							chrI	5579248	5579816	289		chrI	7365142	7365932	206		chrI	7759036	7759517	225		chrI	6397949	6398469	282
chrI	6407207	6407593	186							chrI	5608790	5609356	208		chrI	7366281	7366878	245		chrI	7762422	7762793	198		chrI	6407207	6407593	186
chrI	6418716	6419066	157							chrI	5610495	5610956	249		chrI	7367059	7367581	268		chrI	7770820	7771742	766		chrI	6418716	6419066	157
chrI	6434481	6434902	202							chrI	5618335	5618661	199		chrI	7367983	7370658	360		chrI	7772435	7772876	266		chrI	6434481	6434902	202
chrI	6435433	6436332	420							chrI	5637681	5638269	283		chrI	7371775	7372387	329		chrI	7814481	7814952	225		chrI	6435433	6436332	420
chrI	6436821	6437783	647							chrI	5639093	5639551	218		chrI	7374627	7375297	284		chrI	7861391	7862408	280		chrI	6436821	6437783	647
chrI	6446456	6447272	216							chrI	5653471	5653932	237		chrI	7375704	7376190	275		chrI	7865921	7868211	273		chrI	6446456	6447272	216
chrI	6459421	6459972	298							chrI	5658990	5659400	185		chrI	7392043	7392516	243		chrI	7868553	7869631	742		chrI	6459421	6459972	298
chrI	6488834	6489133	146							chrI	5673565	5673988	222		chrI	7398222	7398663	194		chrI	7871949	7872615	433		chrI	6488834	6489133	146
chrI	6493782	6494257	234							chrI	5678017	5678443	203		chrI	7404667	7405089	186		chrI	7935715	7936288	354		chrI	6493782	6494257	234
chrI	6531925	6532288	173							chrI	5691608	5692001	164		chrI	7412815	7413208	126		chrI	7951492	7952628	524		chrI	6531925	6532288	173
chrI	6541848	6542259	198							chrI	5698936	5699359	200		chrI	7421202	7421737	256		chrI	7954552	7955350	329		chrI	6541848	6542259	198
chrI	6554443	6554890	228							chrI	5706725	5707284	289		chrI	7466482	7467039	267		chrI	7961711	7962141	189		chrI	6554443	6554890	228
chrI	6562369	6562752	185							chrI	5707746	5708122	180		chrI	7472142	7472872	345		chrI	7968815	7969203	246		chrI	6562369	6562752	185
chrI	6564394	6564836	228							chrI	5743908	5744270	171		chrI	7474131	7475958	1212		chrI	7993183	7993583	184		chrI	6564394	6564836	228
chrI	6569059	6569706	399							chrI	5807238	5807738	247		chrI	7476677	7477226	314		chrI	8010202	8010706	260		chrI	6569059	6569706	399
chrI	6572601	6573154	286							chrI	5842917	5843364	241		chrI	7478434	7478870	181		chrI	8024494	8024931	214		chrI	6572601	6573154	286
chrI	6573336	6573809	235							chrI	5865908	5866361	159		chrI	7479026	7479611	376		chrI	8046376	8047237	213		chrI	6573336	6573809	235
chrI	6573947	6574921	758							chrI	5870506	5870914	227		chrI	7480020	7480516	227		chrI	8119136	8119531	209		chrI	6573947	6574921	758
chrI	6579711	6580238	242							chrI	5871798	5872217	204		chrI	7489801	7490599	525		chrI	8124254	8124874	378		chrI	6579711	6580238	242
chrI	6607756	6608657	394							chrI	5936863	5937341	268		chrI	7491641	7493323	426		chrI	8133500	8134190	315		chrI	6607756	6608657	394
chrI	6611210	6611603	242							chrI	5973508	5973922	179		chrI	7494144	7495036	323		chrI	8134803	8136123	999		chrI	6611210	6611603	242
chrI	6637209	6637695	286							chrI	5976041	5976448	196		chrI	7500138	7500890	355		chrI	8222926	8223434	235		chrI	6637209	6637695	286
chrI	6638709	6639112	178							chrI	5982785	5983129	162		chrI	7515626	7516264	322		chrI	8224159	8224671	238		chrI	6638709	6639112	178
chrI	6647810	6648410	309							chrI	5986125	5986634	252		chrI	7517977	7519273	490		chrI	8245282	8245803	215		chrI	6647810	6648410	309
chrI	6671225	6671611	201							chrI	6011649	6012153	274		chrI	7521109	7521577	184		chrI	8262875	8263297	170		chrI	6671225	6671611	201
chrI	6677040	6677435	191							chrI	6038017	6038484	192		chrI	7522915	7523391	219		chrI	8277908	8278408	214		chrI	6677040	6677435	191
chrI	6692797	6693183	192							chrI	6051049	6051430	192		chrI	7542053	7542566	260		chrI	8288632	8289067	221		chrI	6692797	6693183	192
chrI	6712876	6713230	223							chrI	6060927	6061532	377		chrI	7543337	7543804	228		chrI	8305153	8305996	416		chrI	6712876	6713230	223
chrI	6723026	6723633	248							chrI	6082608	6083114	241		chrI	7544482	7545002	250		chrI	8306364	8306963	312		chrI	6723026	6723633	248
chrI	6724154	6724738	301							chrI	6090910	6091373	213		chrI	7548009	7548694	217		chrI	8312448	8312992	279		chrI	6724154	6724738	301
chrI	6745340	6745789	231							chrI	6091486	6092258	290		chrI	7550121	7550541	184		chrI	8329558	8330025	217		chrI	6745340	6745789	231
chrI	6756978	6757490	281							chrI	6092602	6093243	233		chrI	7559479	7559914	219		chrI	8344354	8345186	243		chrI	6756978	6757490	281
chrI	6769014	6769346	171							chrI	6093728	6095192	1057		chrI	7563034	7563519	204		chrI	8392535	8392998	251		chrI	6769014	6769346	171
chrI	6780015	6780434	228							chrI	6103002	6103697	209		chrI	7570563	7571546	668		chrI	8406596	8407015	155		chrI	6780015	6780434	228
chrI	6781551	6782016	225							chrI	6105512	6106068	301		chrI	7573717	7574311	343		chrI	8409593	8410299	282		chrI	6781551	6782016	225
chrI	6789930	6790629	244							chrI	6109579	6109954	208		chrI	7575222	7575880	368		chrI	8411023	8411609	303		chrI	6789930	6790629	244
chrI	6799457	6799903	200							chrI	6118006	6118449	227		chrI	7595311	7596170	345		chrI	8426498	8427218	389		chrI	6799457	6799903	200
chrI	6806171	6806932	170							chrI	6135592	6136086	260		chrI	7596386	7597399	746		chrI	8529976	8530352	175		chrI	6806171	6806932	170
chrI	6810268	6810835	298							chrI	6136390	6136874	244		chrI	7656385	7661497	2472		chrI	8580001	8580526	273		chrI	6810268	6810835	298
chrI	6823303	6823652	164							chrI	6163285	6163776	237		chrI	7661854	7662616	416		chrI	8581453	8582055	521		chrI	6823303	6823652	164
chrI	6827993	6828817	629							chrI	6164028	6164435	168		chrI	7700882	7701293	183		chrI	8582559	8583017	234		chrI	6827993	6828817	629
chrI	6834712	6836135	670							chrI	6183752	6184173	213		chrI	7707036	7707517	239		chrI	8590556	8590934	180		chrI	6834712	6836135	670
chrI	6837970	6838532	282							chrI	6198502	6199055	150		chrI	7708165	7710273	255		chrI	8614930	8615431	235		chrI	6837970	6838532	282
chrI	6881962	6882332	168							chrI	6206473	6206939	229		chrI	7710813	7711207	206		chrI	8728421	8728837	195		chrI	6881962	6882332	168
chrI	6885171	6885623	186							chrI	6212607	6213074	253		chrI	7711419	7712203	317		chrI	8747792	8748321	295		chrI	6885171	6885623	186
chrI	6945629	6945987	168							chrI	6220825	6221216	166		chrI	7712474	7713218	258		chrI	8761635	8762241	361		chrI	6945629	6945987	168
chrI	6949173	6949683	269							chrI	6224639	6225031	214		chrI	7724564	7724995	208		chrI	8783593	8784500	555		chrI	6949173	6949683	269
chrI	6965441	6965934	234							chrI	6238373	6238705	145		chrI	7747439	7747948	240		chrI	8786596	8787363	333		chrI	6965441	6965934	234
chrI	6970069	6970513	233							chrI	6252714	6253210	263		chrI	7759069	7759491	235		chrI	8787649	8787992	166		chrI	6970069	6970513	233
chrI	6974262	6974589	196							chrI	6259145	6259537	161		chrI	7771089	7771785	404		chrI	8792226	8792721	269		chrI	6974262	6974589	196
chrI	6995904	6996279	197							chrI	6289907	6290397	276		chrI	7772400	7772877	244		chrI	8807919	8808442	233		chrI	6995904	6996279	197
chrI	7020906	7021974	553							chrI	6314662	6315132	230		chrI	7814506	7814922	203		chrI	8813228	8813713	221		chrI	7020906	7021974	553
chrI	7031417	7031800	122							chrI	6317671	6318159	217		chrI	7830177	7830600	259		chrI	8816315	8816805	248		chrI	7031417	7031800	122
chrI	7033150	7033598	246							chrI	6358364	6358822	241		chrI	7848781	7849304	259		chrI	8864012	8864412	201		chrI	7033150	7033598	246
chrI	7036740	7037263	220							chrI	6364608	6365091	253		chrI	7861354	7862348	309		chrI	8865151	8866140	401		chrI	7036740	7037263	220
chrI	7040709	7041168	273							chrI	6366105	6366626	242		chrI	7865994	7868168	1254		chrI	8867420	8868744	249		chrI	7040709	7041168	273
chrI	7048294	7048781	240							chrI	6397963	6398455	254		chrI	7868820	7869609	477		chrI	8868992	8869437	221		chrI	7048294	7048781	240
chrI	7054597	7055077	185							chrI	6407169	6407661	230		chrI	7871827	7872475	476		chrI	8935000	8935478	200		chrI	7054597	7055077	185
chrI	7055859	7056565	537							chrI	6412426	6412905	323		chrI	7935632	7936363	451		chrI	8961980	8962302	150		chrI	7055859	7056565	537
chrI	7056742	7057343	262							chrI	6421714	6422219	251		chrI	7951544	7952867	420		chrI	8985694	8986396	364		chrI	7056742	7057343	262
chrI	7059142	7059769	239							chrI	6435598	6436342	283		chrI	7954519	7955428	430		chrI	8986479	8987657	840		chrI	7059142	7059769	239
chrI	7069056	7069490	250							chrI	6441218	6441670	338		chrI	7961745	7962140	182		chrI	9042674	9042998	194		chrI	7069056	7069490	250
chrI	7078946	7080437	599							chrI	6446407	6447309	267		chrI	7968774	7969241	273		chrI	9053312	9053785	232		chrI	7078946	7080437	599
chrI	7081609	7083691	709							chrI	6459443	6459942	262		chrI	7993092	7993623	244		chrI	9054656	9055772	856		chrI	7081609	7083691	709
chrI	7083824	7085285	863							chrI	6465830	6466177	201		chrI	8024493	8024956	226		chrI	9057785	9058113	241		chrI	7083824	7085285	863
chrI	7087225	7087926	242							chrI	6493742	6494233	275		chrI	8046363	8047241	232		chrI	9064636	9064992	165		chrI	7087225	7087926	242
chrI	7090211	7090674	214							chrI	6531841	6532315	263		chrI	8115939	8116354	205		chrI	9075994	9076628	307		chrI	7090211	7090674	214
chrI	7094848	7095179	180							chrI	6541701	6542312	349		chrI	8116756	8117255	288		chrI	9077208	9077751	259		chrI	7094848	7095179	180
chrI	7098099	7098539	230							chrI	6552421	6552905	263		chrI	8119117	8119589	195		chrI	9082937	9083435	224		chrI	7098099	7098539	230
chrI	7099517	7099950	203							chrI	6554439	6554897	232		chrI	8124182	8124874	416		chrI	9092100	9092884	358		chrI	7099517	7099950	203
chrI	7125433	7126059	323							chrI	6562300	6562822	284		chrI	8125245	8125738	225		chrI	9095397	9096019	385		chrI	7125433	7126059	323
chrI	7128099	7128686	271							chrI	6564361	6564908	287		chrI	8133455	8136163	360		chrI	9097329	9098391	433		chrI	7128099	7128686	271
chrI	7129366	7129812	251							chrI	6569021	6569798	423		chrI	8202845	8203287	171		chrI	9110724	9111264	265		chrI	7129366	7129812	251
chrI	7147416	7148036	403							chrI	6572613	6573782	966		chrI	8222900	8223859	266		chrI	9112795	9113524	385		chrI	7147416	7148036	403
chrI	7149544	7149928	196							chrI	6573984	6574924	358		chrI	8224127	8224662	285		chrI	9128695	9129668	258		chrI	7149544	7149928	196
chrI	7159158	7159528	216							chrI	6579814	6580183	130		chrI	8230051	8230480	218		chrI	9131779	9132200	219		chrI	7159158	7159528	216
chrI	7188206	7188547	173							chrI	6584896	6586786	718		chrI	8245313	8245809	310		chrI	9145325	9145882	326		chrI	7188206	7188547	173
chrI	7209809	7210160	182							chrI	6607819	6608499	310		chrI	8259253	8259783	287		chrI	9149093	9149627	273		chrI	7209809	7210160	182
chrI	7217212	7217713	274							chrI	6611085	6611642	325		chrI	8262876	8263256	155		chrI	9150197	9150563	126		chrI	7217212	7217713	274
chrI	7251453	7251811	176							chrI	6626703	6627125	228		chrI	8277924	8278338	175		chrI	9163254	9163784	257		chrI	7251453	7251811	176
chrI	7283631	7284044	188							chrI	6712839	6713259	192		chrI	8288629	8289032	161		chrI	9166896	9167537	426		chrI	7283631	7284044	188
chrI	7302975	7303355	190							chrI	6722983	6723564	280		chrI	8305074	8306044	443		chrI	9168434	9168866	200		chrI	7302975	7303355	190
chrI	7304689	7305036	130							chrI	6724110	6724969	323		chrI	8306362	8306891	246		chrI	9172487	9173257	216		chrI	7304689	7305036	130
chrI	7314284	7314731	234							chrI	6736125	6736551	190		chrI	8307355	8307955	418		chrI	9196984	9197753	642		chrI	7314284	7314731	234
chrI	7321384	7321940	314							chrI	6745303	6745829	287		chrI	8308709	8309176	270		chrI	9199184	9199561	163		chrI	7321384	7321940	314
chrI	7325052	7325412	179							chrI	6756344	6756840	216		chrI	8312422	8312939	253		chrI	9199775	9200504	257		chrI	7325052	7325412	179
chrI	7325886	7326365	203							chrI	6757036	6757449	197		chrI	8329563	8330071	233		chrI	9202006	9202336	108		chrI	7325886	7326365	203
chrI	7331820	7332231	205							chrI	6759951	6760625	385		chrI	8344351	8344813	219		chrI	9266915	9267341	195		chrI	7331820	7332231	205
chrI	7334813	7335206	188							chrI	6772208	6772668	403		chrI	8392515	8393029	239		chrI	9268745	9269210	247		chrI	7334813	7335206	188
chrI	7340934	7341451	178							chrI	6772773	6773044	61		chrI	8406562	8407008	220		chrI	9275098	9275641	266		chrI	7340934	7341451	178
chrI	7342402	7342970	250							chrI	6779987	6780417	200		chrI	8409589	8410274	322		chrI	9279227	9279677	230		chrI	7342402	7342970	250
chrI	7347270	7347912	193							chrI	6781599	6782057	209		chrI	8411056	8411701	255		chrI	9280537	9281117	379		chrI	7347270	7347912	193
chrI	7361634	7362262	161							chrI	6789922	6790451	231		chrI	8426469	8427254	445		chrI	9307422	9307997	302		chrI	7361634	7362262	161
chrI	7363512	7363893	173							chrI	6799404	6799903	263		chrI	8579990	8580584	272		chrI	9313658	9314201	423		chrI	7363512	7363893	173
chrI	7364376	7364772	180							chrI	6810290	6810724	242		chrI	8581291	8582111	667		chrI	9315269	9316065	348		chrI	7364376	7364772	180
chrI	7365207	7366754	1300							chrI	6814064	6814576	240		chrI	8582474	8583120	368		chrI	9316907	9317334	203		chrI	7365207	7366754	1300
chrI	7367116	7367509	226							chrI	6834720	6836295	650		chrI	8590508	8590956	213		chrI	9322398	9322905	213		chrI	7367116	7367509	226
chrI	7368027	7369776	393							chrI	6838018	6838613	291		chrI	8614924	8615438	270		chrI	9330746	9331106	201		chrI	7368027	7369776	393
chrI	7369990	7370707	291							chrI	6849834	6850300	261		chrI	8719470	8719813	221		chrI	9332322	9333456	373		chrI	7369990	7370707	291
chrI	7371736	7372346	382							chrI	6913954	6914343	187		chrI	8728377	8728847	260		chrI	9334402	9334806	220		chrI	7371736	7372346	382
chrI	7374693	7375275	214							chrI	6923780	6924170	165		chrI	8747842	8748321	229		chrI	9343638	9344411	393		chrI	7374693	7375275	214
chrI	7375622	7376219	345							chrI	6949135	6949680	317		chrI	8759744	8760211	217		chrI	9372703	9373772	576		chrI	7375622	7376219	345
chrI	7392080	7392491	199							chrI	6965502	6965931	215		chrI	8761589	8762379	416		chrI	9374518	9375672	938		chrI	7392080	7392491	199
chrI	7398223	7398679	226							chrI	6970109	6970537	215		chrI	8783627	8784495	516		chrI	9379140	9384209	2437		chrI	7398223	7398679	226
chrI	7404668	7405106	195							chrI	7002205	7002606	220		chrI	8786612	8787374	356		chrI	9405247	9405597	190		chrI	7404668	7405106	195
chrI	7409527	7410059	308							chrI	7005413	7005935	191		chrI	8792013	8792663	452		chrI	9422140	9422611	243		chrI	7409527	7410059	308
chrI	7412808	7413176	144							chrI	7015403	7016058	329		chrI	8807895	8808481	210		chrI	9424361	9425413	756		chrI	7412808	7413176	144
chrI	7421255	7421721	235							chrI	7020880	7021931	592		chrI	8813223	8813771	228		chrI	9425975	9426592	153		chrI	7421255	7421721	235
chrI	7428658	7429239	413							chrI	7029321	7030268	599		chrI	8816277	8816813	286		chrI	9427644	9428619	719		chrI	7428658	7429239	413
chrI	7435810	7436290	196							chrI	7048218	7051752	527		chrI	8852267	8852691	249		chrI	9445687	9446164	218		chrI	7435810	7436290	196
chrI	7438544	7438926	187							chrI	7054427	7055096	324		chrI	8864010	8864443	236		chrI	9448083	9448595	282		chrI	7438544	7438926	187
chrI	7466444	7467072	297							chrI	7055906	7057522	1072		chrI	8865209	8866110	394		chrI	9474760	9475170	208		chrI	7466444	7467072	297
chrI	7467997	7468526	218							chrI	7058526	7060142	988		chrI	8866399	8868802	1188		chrI	9488093	9488514	209		chrI	7467997	7468526	218
chrI	7472219	7472842	259							chrI	7060398	7063321	2184		chrI	8868986	8869508	258		chrI	9494517	9494870	176		chrI	7472219	7472842	259
chrI	7474630	7475884	640							chrI	7065739	7066890	721		chrI	8905389	8905810	207		chrI	9500785	9501311	184		chrI	7474630	7475884	640
chrI	7476595	7477351	464							chrI	7068789	7069703	503		chrI	8917664	8918057	199		chrI	9505828	9506353	309		chrI	7476595	7477351	464
chrI	7479140	7479679	257							chrI	7074543	7075134	218		chrI	8935082	8935528	261		chrI	9515963	9516338	203		chrI	7479140	7479679	257
chrI	7480058	7480501	211							chrI	7078020	7083458	1446		chrI	8938616	8939011	159		chrI	9605559	9606015	209		chrI	7480058	7480501	211
chrI	7489938	7490578	364							chrI	7084182	7084877	356		chrI	8961955	8962314	159		chrI	9619745	9620245	249		chrI	7489938	7490578	364
chrI	7491689	7492484	375							chrI	7086661	7088104	1057		chrI	8985570	8986340	495		chrI	9625815	9626336	246		chrI	7491689	7492484	375
chrI	7492705	7493283	331							chrI	7090089	7090720	340		chrI	8986587	8987662	789		chrI	9664949	9665437	267		chrI	7492705	7493283	331
chrI	7494219	7495123	258							chrI	7094706	7095292	326		chrI	9013988	9014355	169		chrI	9669005	9669507	249		chrI	7494219	7495123	258
chrI	7500158	7500936	300							chrI	7097956	7098783	358		chrI	9051229	9051679	276		chrI	9688691	9689121	212		chrI	7500158	7500936	300
chrI	7515659	7516273	244							chrI	7099400	7100225	352		chrI	9053238	9053880	217		chrI	9705437	9705942	202		chrI	7515659	7516273	244
chrI	7518127	7519197	388							chrI	7106579	7108180	1018		chrI	9054575	9055763	368		chrI	9721793	9722746	455		chrI	7518127	7519197	388
chrI	7521133	7521482	158							chrI	7116524	7117604	285		chrI	9057635	9058202	276		chrI	9725147	9725714	289		chrI	7521133	7521482	158
chrI	7542095	7542545	228							chrI	7121648	7123024	673		chrI	9064522	9064979	228		chrI	9739370	9739773	154		chrI	7542095	7542545	228
chrI	7544563	7545032	185							chrI	7125499	7126024	300		chrI	9076015	9076630	283		chrI	9750947	9751355	174		chrI	7544563	7545032	185
chrI	7548026	7548337	139							chrI	7128070	7128612	313		chrI	9077199	9077744	295		chrI	9752304	9753278	292		chrI	7548026	7548337	139
chrI	7550224	7550565	185							chrI	7137890	7138691	356		chrI	9082879	9083436	272		chrI	9767801	9768414	220		chrI	7550224	7550565	185
chrI	7559493	7559896	175							chrI	7147450	7148066	358		chrI	9084101	9084551	193		chrI	9768525	9769053	312		chrI	7559493	7559896	175
chrI	7562969	7563524	278							chrI	7149559	7149867	206		chrI	9092101	9092828	381		chrI	9787480	9788978	1205		chrI	7562969	7563524	278
chrI	7570580	7571538	721							chrI	7158590	7159596	776		chrI	9095451	9096045	276		chrI	9790611	9791499	482		chrI	7570580	7571538	721
chrI	7573767	7574285	273							chrI	7188275	7188584	133		chrI	9096314	9096928	384		chrI	9797716	9798157	237		chrI	7573767	7574285	273
chrI	7575135	7575903	409							chrI	7233013	7233423	217		chrI	9097286	9098280	472		chrI	9799501	9800118	356		chrI	7575135	7575903	409
chrI	7581677	7582147	238							chrI	7251405	7251879	211		chrI	9100312	9101218	621		chrI	9805351	9805713	186		chrI	7581677	7582147	238
chrI	7595349	7596097	339							chrI	7279167	7279728	276		chrI	9110714	9111284	286		chrI	9806932	9807367	235		chrI	7595349	7596097	339
chrI	7596771	7597577	228							chrI	7283608	7284072	225		chrI	9112850	9113502	354		chrI	9842263	9842849	245		chrI	7596771	7597577	228
chrI	7656531	7661547	2336							chrI	7302886	7303331	188		chrI	9128647	9129204	312		chrI	9845353	9845766	236		chrI	7656531	7661547	2336
chrI	7661904	7662645	375							chrI	7304672	7305055	158		chrI	9131809	9132239	200		chrI	9846139	9846716	322		chrI	7661904	7662645	375
chrI	7676187	7676545	191							chrI	7314225	7314749	256		chrI	9145386	9145857	192		chrI	9852035	9852744	126		chrI	7676187	7676545	191
chrI	7700893	7701252	173							chrI	7321402	7321982	285		chrI	9149086	9149637	307		chrI	9853697	9854519	322		chrI	7700893	7701252	173
chrI	7709327	7710175	334							chrI	7331874	7332213	203		chrI	9150189	9150556	179		chrI	9854622	9855791	247		chrI	7709327	7710175	334
chrI	7710471	7711225	518							chrI	7347134	7347665	265		chrI	9163239	9163765	255		chrI	9868992	9869682	324		chrI	7710471	7711225	518
chrI	7711496	7712064	247							chrI	7353917	7355450	514		chrI	9166850	9167696	392		chrI	9883474	9883952	259		chrI	7711496	7712064	247
chrI	7712557	7713097	245							chrI	7358315	7360244	1142		chrI	9172471	9173429	262		chrI	9934313	9934733	236		chrI	7712557	7713097	245
chrI	7715718	7716161	298							chrI	7371726	7372352	307		chrI	9196832	9197706	242		chrI	9938227	9938753	279		chrI	7715718	7716161	298
chrI	7724576	7724957	207							chrI	7374677	7377352	399		chrI	9199160	9199658	236		chrI	9962667	9963201	280		chrI	7724576	7724957	207
chrI	7747389	7748065	262							chrI	7383078	7383571	249		chrI	9199746	9200824	408		chrI	9969267	9969822	273		chrI	7747389	7748065	262
chrI	7758075	7758469	244							chrI	7385146	7385634	236		chrI	9266900	9267334	211		chrI	9979670	9980150	234		chrI	7758075	7758469	244
chrI	7759048	7759518	246							chrI	7391967	7392536	294		chrI	9275137	9275686	240		chrI	9984874	9985236	166		chrI	7759048	7759518	246
chrI	7762418	7762864	152							chrI	7397415	7397892	165		chrI	9279244	9279670	261		chrI	9988749	9989239	247		chrI	7762418	7762864	152
chrI	7770719	7771768	807							chrI	7404698	7405646	719		chrI	9280489	9281101	416		chrI	10025844	10026293	210		chrI	7770719	7771768	807
chrI	7772424	7772880	245							chrI	7409221	7410070	593		chrI	9307387	9308038	344		chrI	10030019	10030512	250		chrI	7772424	7772880	245
chrI	7814544	7814902	189							chrI	7412762	7413177	177		chrI	9315276	9316010	273		chrI	10031572	10032126	263		chrI	7814544	7814902	189
chrI	7830236	7830596	233							chrI	7453216	7461700	4135		chrI	9316907	9317271	172		chrI	10032447	10033732	648		chrI	7830236	7830596	233
chrI	7840022	7840451	203							chrI	7466228	7467865	513		chrI	9322411	9322868	285		chrI	10034877	10035395	285		chrI	7840022	7840451	203
chrI	7848850	7849230	151							chrI	7467991	7468527	181		chrI	9330723	9331137	186		chrI	10037044	10038140	679		chrI	7848850	7849230	151
chrI	7861313	7862397	399							chrI	7468762	7469611	428		chrI	9332411	9333428	265		chrI	10039614	10040769	590		chrI	7861313	7862397	399
chrI	7865943	7868164	246							chrI	7471909	7472935	536		chrI	9343603	9344444	407		chrI	10074663	10075113	194		chrI	7865943	7868164	246
chrI	7868610	7869622	644							chrI	7474578	7475727	701		chrI	9371663	9373876	1623		chrI	10097061	10097671	269		chrI	7868610	7869622	644
chrI	7871901	7872471	385							chrI	7478321	7479844	1080		chrI	9374499	9375670	880		chrI	10099095	10099515	184		chrI	7871901	7872471	385
chrI	7885797	7886192	197							chrI	7479947	7480774	348		chrI	9378308	9382383	3392		chrI	10101922	10102612	512		chrI	7885797	7886192	197
chrI	7935707	7936367	381							chrI	7481371	7488291	3334		chrI	9382593	9384653	350		chrI	10104017	10104561	302		chrI	7935707	7936367	381
chrI	7951616	7952822	302							chrI	7489564	7490620	616		chrI	9385341	9386395	728		chrI	10121945	10122411	225		chrI	7951616	7952822	302
chrI	7954514	7955413	404							chrI	7491672	7492490	390		chrI	9390052	9390533	241		chrI	10145153	10145647	221		chrI	7954514	7955413	404
chrI	7961723	7962131	198							chrI	7492780	7493372	260		chrI	9422117	9422619	233		chrI	10174625	10175692	659		chrI	7961723	7962131	198
chrI	7968826	7969267	373							chrI	7494145	7495169	320		chrI	9423830	9425461	1007		chrI	10178161	10178640	231		chrI	7968826	7969267	373
chrI	7993153	7993678	276							chrI	7500100	7501030	433		chrI	9425954	9426728	292		chrI	10190840	10191285	210		chrI	7993153	7993678	276
chrI	8009711	8010706	762							chrI	7503343	7504394	471		chrI	9427657	9428615	655		chrI	10196931	10197513	206		chrI	8009711	8010706	762
chrI	8011313	8011799	214							chrI	7504654	7508813	3535		chrI	9430538	9430994	253		chrI	10232451	10232871	183		chrI	8011313	8011799	214
chrI	8018877	8019353	286							chrI	7508947	7509653	438		chrI	9440298	9440702	210		chrI	10235054	10235655	301		chrI	8018877	8019353	286
chrI	8024491	8024954	228							chrI	7515592	7516251	296		chrI	9445701	9446263	165		chrI	10237285	10237686	248		chrI	8024491	8024954	228
chrI	8046378	8046806	271							chrI	7518115	7519227	373		chrI	9448010	9448576	289		chrI	10262107	10262700	381		chrI	8046378	8046806	271
chrI	8102993	8103270	146							chrI	7526277	7537223	903		chrI	9449933	9450389	270		chrI	10297838	10298337	252		chrI	8102993	8103270	146
chrI	8119133	8119577	220							chrI	7542072	7542569	203		chrI	9471050	9471548	224		chrI	10302575	10305524	499		chrI	8119133	8119577	220
chrI	8120200	8120538	151							chrI	7552410	7554292	1294		chrI	9474753	9475243	211		chrI	10316770	10319638	2149		chrI	8120200	8120538	151
chrI	8124203	8124856	398							chrI	7559336	7559999	341		chrI	9494419	9494910	272		chrI	10330425	10330807	181		chrI	8124203	8124856	398
chrI	8125318	8125876	168							chrI	7562924	7563544	336		chrI	9495583	9496045	208		chrI	10396154	10396539	218		chrI	8125318	8125876	168
chrI	8133495	8134093	315							chrI	7567503	7568297	308		chrI	9500692	9501349	363		chrI	10398659	10399071	242		chrI	8133495	8134093	315
chrI	8134945	8136125	749							chrI	7570163	7571049	660		chrI	9505850	9506393	317		chrI	10400577	10401006	188		chrI	8134945	8136125	749
chrI	8202846	8203349	212							chrI	7573772	7574455	209		chrI	9515913	9516401	219		chrI	10405846	10406749	403		chrI	8202846	8203349	212
chrI	8222931	8223398	228							chrI	7575057	7576067	469		chrI	9581369	9581682	195		chrI	10435646	10436045	204		chrI	8222931	8223398	228
chrI	8223657	8224637	741							chrI	7578030	7579180	723		chrI	9601449	9601949	215		chrI	10437786	10438161	219		chrI	8223657	8224637	741
chrI	8229969	8230393	203							chrI	7581553	7582249	354		chrI	9619728	9620264	259		chrI	10468731	10469544	222		chrI	8229969	8230393	203
chrI	8245330	8245837	301							chrI	7583135	7584590	801		chrI	9625803	9626317	268		chrI	10474578	10474983	211		chrI	8245330	8245837	301
chrI	8259354	8259739	213							chrI	7590337	7590845	272		chrI	9664961	9665436	245		chrI	10497907	10498378	245		chrI	8259354	8259739	213
chrI	8261765	8262111	174							chrI	7595145	7596103	505		chrI	9669026	9669516	219		chrI	10513805	10514282	272		chrI	8261765	8262111	174
chrI	8262891	8263221	156							chrI	7596745	7597551	250		chrI	9671806	9672147	201		chrI	10516748	10517448	414		chrI	8262891	8263221	156
chrI	8263406	8263826	203							chrI	7602010	7604019	458		chrI	9688673	9689159	245		chrI	10539141	10539602	229		chrI	8263406	8263826	203
chrI	8277938	8278377	203							chrI	7608180	7608735	260		chrI	9705480	9705928	237		chrI	10541497	10541924	217		chrI	8277938	8278377	203
chrI	8288595	8289059	242							chrI	7633905	7634776	611		chrI	9706810	9707229	317		chrI	10551288	10551818	273		chrI	8288595	8289059	242
chrI	8290969	8291364	187							chrI	7639689	7640362	393		chrI	9720760	9721394	369		chrI	10553673	10554229	281		chrI	8290969	8291364	187
chrI	8305118	8305972	411							chrI	7643061	7643529	246		chrI	9721616	9722825	608		chrI	10560042	10561041	505		chrI	8305118	8305972	411
chrI	8306256	8306871	401							chrI	7649756	7650259	270		chrI	9725109	9725774	319		chrI	10562295	10562882	335		chrI	8306256	8306871	401
chrI	8307329	8307875	419							chrI	7656299	7659293	2526		chrI	9732529	9732937	175		chrI	10564940	10565683	272		chrI	8307329	8307875	419
chrI	8308757	8309126	208							chrI	7659434	7661317	714		chrI	9737464	9737820	131		chrI	10565785	10566176	225		chrI	8308757	8309126	208
chrI	8312459	8313014	234							chrI	7661998	7662532	238		chrI	9752272	9753407	339		chrI	10591509	10591938	227		chrI	8312459	8313014	234
chrI	8329594	8330015	191							chrI	7676064	7676711	336		chrI	9767801	9768212	200		chrI	10592950	10593378	202		chrI	8329594	8330015	191
chrI	8332876	8333192	172							chrI	7679014	7679416	198		chrI	9768537	9769019	268		chrI	10598364	10598805	210		chrI	8332876	8333192	172
chrI	8344387	8344815	196							chrI	7700775	7701324	309		chrI	9787464	9788982	1221		chrI	10642228	10642660	243		chrI	8344387	8344815	196
chrI	8392564	8392978	235							chrI	7702083	7702890	252		chrI	9789967	9791598	1050		chrI	10653406	10653906	253		chrI	8392564	8392978	235
chrI	8406607	8407008	201							chrI	7707011	7707567	273		chrI	9797634	9798205	325		chrI	10718142	10718622	216		chrI	8406607	8407008	201
chrI	8409649	8410238	296							chrI	7712575	7713089	198		chrI	9799544	9800107	290		chrI	10720072	10720544	254		chrI	8409649	8410238	296
chrI	8411040	8411617	270							chrI	7721694	7722094	200		chrI	9807001	9807428	248		chrI	10746399	10746765	187		chrI	8411040	8411617	270
chrI	8416104	8416556	218							chrI	7724509	7725045	284		chrI	9834844	9835205	151		chrI	10748108	10748914	445		chrI	8416104	8416556	218
chrI	8426514	8427177	367							chrI	7730606	7731341	355		chrI	9842280	9842815	281		chrI	10749786	10750388	274		chrI	8426514	8427177	367
chrI	8580016	8580556	279							chrI	7772379	7772929	299		chrI	9845285	9845792	256		chrI	10751427	10752479	372		chrI	8580016	8580556	279
chrI	8581456	8582069	162							chrI	7814451	7814961	260		chrI	9846134	9846872	341		chrI	10752778	10753354	323		chrI	8581456	8582069	162
chrI	8582488	8583101	332							chrI	7820481	7820952	213		chrI	9851990	9853356	250		chrI	10753735	10754783	249		chrI	8582488	8583101	332
chrI	8590510	8590935	194							chrI	7835446	7835868	213		chrI	9853629	9855787	436		chrI	10755655	10756068	176		chrI	8590510	8590935	194
chrI	8614897	8615402	236							chrI	7848781	7849286	178		chrI	9862602	9863048	240		chrI	10756329	10757707	782		chrI	8614897	8615402	236
chrI	8696199	8696598	207							chrI	7857285	7858529	318		chrI	9869063	9870417	292		chrI	10769561	10770405	324		chrI	8696199	8696598	207
chrI	8719367	8719757	162							chrI	7861432	7862366	198		chrI	9883366	9883942	376		chrI	10772121	10772686	283		chrI	8719367	8719757	162
chrI	8728396	8728802	222							chrI	7865993	7868187	199		chrI	9934292	9934755	209		chrI	10777122	10777757	414		chrI	8728396	8728802	222
chrI	8747817	8748329	263							chrI	7868631	7868928	284		chrI	9938234	9938740	271		chrI	10795814	10796235	198		chrI	8747817	8748329	263
chrI	8759810	8760808	185							chrI	7869019	7869518	225		chrI	9961920	9962380	212		chrI	10807062	10807448	160		chrI	8759810	8760808	185
chrI	8761191	8762420	844							chrI	7871635	7872824	707		chrI	9962564	9963203	374		chrI	10838992	10839412	218		chrI	8761191	8762420	844
chrI	8783688	8784341	519							chrI	7895165	7895583	220		chrI	9963590	9964092	291		chrI	10857751	10858995	313		chrI	8783688	8784341	519
chrI	8786623	8787987	300							chrI	7926252	7926674	238		chrI	9969280	9969844	276		chrI	10927328	10927805	192		chrI	8786623	8787987	300
chrI	8792184	8792826	301							chrI	7935382	7936427	694		chrI	9972954	9973440	223		chrI	10970099	10970477	191		chrI	8792184	8792826	301
chrI	8807912	8808567	195							chrI	7940550	7941029	230		chrI	9979643	9980144	258		chrI	11095577	11096081	221		chrI	8807912	8808567	195
chrI	8813249	8813671	218							chrI	7942378	7942912	340		chrI	9988746	9989225	239		chrI	11182269	11182812	263		chrI	8813249	8813671	218
chrI	8816316	8816790	243							chrI	7951631	7952775	307		chrI	10025839	10026314	229		chrI	11188073	11188507	203		chrI	8816316	8816790	243
chrI	8839070	8839468	202							chrI	7954604	7955648	334		chrI	10029861	10030627	375		chrI	11202115	11202752	382		chrI	8839070	8839468	202
chrI	8852153	8853130	398							chrI	7961618	7962220	280		chrI	10031476	10032234	367		chrI	11237826	11238321	260		chrI	8852153	8853130	398
chrI	8864000	8864486	240							chrI	7993070	7993634	186		chrI	10032516	10033906	612		chrI	11374194	11374691	259		chrI	8864000	8864486	240
chrI	8865204	8866375	359							chrI	8010178	8010737	272		chrI	10034857	10035422	311		chrI	11416498	11416991	245		chrI	8865204	8866375	359
chrI	8867080	8868698	610							chrI	8011249	8011797	284		chrI	10035595	10038117	2130		chrI	11432716	11433191	246		chrI	8867080	8868698	610
chrI	8868964	8869482	282							chrI	8024490	8024956	221		chrI	10039572	10040793	836		chrI	11435891	11436540	441		chrI	8868964	8869482	282
chrI	8905350	8905802	227							chrI	8027811	8028191	186		chrI	10043951	10044706	473		chrI	11456093	11456606	260		chrI	8905350	8905802	227
chrI	8935049	8935450	216							chrI	8082856	8083661	601		chrI	10074707	10075109	161		chrI	11505341	11505751	188		chrI	8935049	8935450	216
chrI	8938670	8938983	113							chrI	8100091	8100438	171		chrI	10092433	10092792	189		chrI	11517067	11517599	252		chrI	8938670	8938983	113
chrI	8985606	8986314	491							chrI	8109154	8109799	306		chrI	10095084	10095893	239		chrI	11517785	11518415	362		chrI	8985606	8986314	491
chrI	9042649	9043051	198							chrI	8124315	8124804	277		chrI	10097116	10097639	290		chrI	11520642	11521398	502		chrI	9042649	9043051	198
chrI	9051142	9051481	169							chrI	8125339	8125873	171		chrI	10099093	10099559	212		chrI	11577318	11577825	267		chrI	9051142	9051481	169
chrI	9052187	9052817	170							chrI	8133525	8134384	269		chrI	10099938	10100424	221		chrI	11578161	11578617	227		chrI	9052187	9052817	170
chrI	9053270	9053729	247							chrI	8134913	8136204	886		chrI	10101908	10102587	430		chrI	11590783	11591393	270		chrI	9053270	9053729	247
chrI	9054660	9055163	285							chrI	8222906	8223517	259		chrI	10103173	10104571	1180		chrI	11595056	11595491	189		chrI	9054660	9055163	285
chrI	9055375	9055748	162							chrI	8223625	8224679	771		chrI	10105264	10105834	304		chrI	11611251	11611674	217		chrI	9055375	9055748	162
chrI	9057731	9058222	300							chrI	8245262	8245906	414		chrI	10121893	10122374	251		chrI	11655255	11655614	212		chrI	9057731	9058222	300
chrI	9064505	9065071	279							chrI	8254854	8255404	350		chrI	10145091	10145682	267		chrI	11693470	11693896	200		chrI	9064505	9065071	279
chrI	9076004	9076666	315							chrI	8259277	8259788	279		chrI	10174837	10175632	523		chrI	11791345	11791942	280		chrI	9076004	9076666	315
chrI	9077216	9077796	238							chrI	8288563	8289059	280		chrI	10176222	10176613	260		chrI	11792679	11793090	207		chrI	9077216	9077796	238
chrI	9082867	9083468	292							chrI	8290930	8291349	233		chrI	10178177	10178708	252		chrI	11840565	11841106	310		chrI	9082867	9083468	292
chrI	9089916	9090857	668							chrI	8293812	8294302	222		chrI	10190856	10191308	200		chrI	11893644	11894100	239		chrI	9089916	9090857	668
chrI	9092085	9092825	340							chrI	8305019	8305831	466		chrI	10196884	10197498	282		chrI	11897081	11897564	237		chrI	9092085	9092825	340
chrI	9093195	9093757	180							chrI	8312373	8312981	314		chrI	10232448	10232973	277		chrI	11929896	11930373	238		chrI	9093195	9093757	180
chrI	9095428	9096003	272							chrI	8329591	8330033	192		chrI	10234907	10235647	458		chrI	11934056	11934570	262		chrI	9095428	9096003	272
chrI	9097369	9098291	380							chrI	8332840	8333298	239		chrI	10237200	10237752	269		chrI	11939918	11940360	253		chrI	9097369	9098291	380
chrI	9110702	9111249	284							chrI	8369598	8370103	235		chrI	10262127	10262638	282		chrI	11964758	11965114	182		chrI	9110702	9111249	284
chrI	9112835	9113486	321							chrI	8392603	8392981	185		chrI	10283462	10284050	468		chrI	11978537	11978989	221		chrI	9112835	9113486	321
chrI	9128657	9129187	280							chrI	8406539	8407024	230		chrI	10297788	10298319	313		chrI	12039497	12040368	399		chrI	9128657	9129187	280
chrI	9130911	9131543	289							chrI	8409638	8410163	240		chrI	10302216	10307171	981		chrI	12043419	12044599	767		chrI	9130911	9131543	289
chrI	9131743	9132288	258							chrI	8411087	8411533	241		chrI	10315032	10320132	3921		chrI	12045091	12046530	549		chrI	9131743	9132288	258
chrI	9141585	9142037	224							chrI	8416115	8416566	215		chrI	10381894	10382264	172		chrI	12054830	12055354	261		chrI	9141585	9142037	224
chrI	9145148	9145878	449							chrI	8426479	8427184	416		chrI	10396164	10396575	170		chrI	12065191	12066011	228		chrI	9145148	9145878	449
chrI	9149125	9149610	237							chrI	8434152	8434648	234		chrI	10398581	10399052	352		chrI	12106024	12106640	346		chrI	9149125	9149610	237
chrI	9150145	9150544	173							chrI	8511217	8511635	223		chrI	10400502	10401000	223		chrI	12164546	12165006	248		chrI	9150145	9150544	173
chrI	9163284	9163787	228							chrI	8529960	8530323	176		chrI	10406029	10406517	252		chrI	12170591	12171063	230		chrI	9163284	9163787	228
chrI	9166884	9167559	402							chrI	8582523	8583149	215		chrI	10435611	10436120	263		chrI	12178115	12178604	265		chrI	9166884	9167559	402
chrI	9168332	9169022	328							chrI	8590524	8590919	194		chrI	10468737	10469526	204		chrI	12179346	12179825	275		chrI	9168332	9169022	328
chrI	9172423	9173372	304							chrI	8608653	8609086	259		chrI	10474551	10474995	247		chrI	12198358	12198895	249		chrI	9172423	9173372	304
chrI	9187979	9188645	427							chrI	8614931	8615434	253		chrI	10492546	10492956	144		chrI	12206494	12206932	193		chrI	9187979	9188645	427
chrI	9196906	9197735	253							chrI	8692410	8692830	226		chrI	10497805	10498384	276		chrI	12225215	12225806	246		chrI	9196906	9197735	253
chrI	9199246	9199561	168							chrI	8696248	8696642	177		chrI	10506329	10506736	167		chrI	12251616	12251960	160		chrI	9199246	9199561	168
chrI	9199866	9200397	269							chrI	8702233	8702655	217		chrI	10513856	10514296	184		chrI	12263314	12263782	237		chrI	9199866	9200397	269
chrI	9202001	9202404	194							chrI	8728345	8728875	291		chrI	10516703	10517475	490		chrI	12276276	12276625	152		chrI	9202001	9202404	194
chrI	9248756	9249631	678							chrI	8747854	8748285	225		chrI	10539162	10539798	252		chrI	12280330	12280815	256		chrI	9248756	9249631	678
chrI	9266935	9267315	171							chrI	8759715	8760273	220		chrI	10551320	10551850	275		chrI	12385688	12386065	172		chrI	9266935	9267315	171
chrI	9268786	9269147	190							chrI	8779061	8779924	391		chrI	10553652	10554237	277		chrI	12426621	12427066	239		chrI	9268786	9269147	190
chrI	9275127	9275583	248							chrI	8783608	8784254	170		chrI	10560120	10560935	357		chrI	12438575	12439014	199		chrI	9275127	9275583	248
chrI	9279253	9279674	207							chrI	8786694	8787288	290		chrI	10562256	10562914	356		chrI	12441971	12442396	201		chrI	9279253	9279674	207
chrI	9280562	9281042	260							chrI	8792272	8792795	201		chrI	10564932	10565645	275		chrI	12500295	12501042	342		chrI	9280562	9281042	260
chrI	9307159	9308119	571							chrI	8807893	8808562	212		chrI	10565734	10566213	250		chrI	12501197	12501816	287		chrI	9307159	9308119	571
chrI	9315319	9315932	250							chrI	8813281	8813678	194		chrI	10591526	10591921	172		chrI	12520363	12520734	201		chrI	9315319	9315932	250
chrI	9316845	9317323	267							chrI	8816334	8816807	227		chrI	10592926	10593377	213		chrI	12524136	12524951	428		chrI	9316845	9317323	267
chrI	9322404	9322854	259							chrI	8839039	8839541	225		chrI	10598334	10598793	240		chrI	12532048	12532629	273		chrI	9322404	9322854	259
chrI	9327555	9328013	249							chrI	8852220	8852748	235		chrI	10622721	10623094	175		chrI	12546536	12547560	222		chrI	9327555	9328013	249
chrI	9330725	9331203	181							chrI	8865356	8867435	303		chrI	10642205	10642671	266		chrI	12547722	12548492	425		chrI	9330725	9331203	181
chrI	9332368	9333497	260							chrI	8917633	8918097	238		chrI	10653410	10653896	234		chrI	12549366	12550154	505		chrI	9332368	9333497	260
chrI	9343627	9344415	348							chrI	8961925	8962296	161		chrI	10686898	10687380	191		chrI	12550926	12551493	266		chrI	9343627	9344415	348
chrI	9372137	9373763	1140							chrI	8969934	8970390	221		chrI	10718092	10718607	273		chrI	12571626	12572846	313		chrI	9372137	9373763	1140
chrI	9374585	9375003	190							chrI	8986607	8987373	379		chrI	10720092	10720556	233		chrI	12575210	12576638	650		chrI	9374585	9375003	190
chrI	9375118	9375681	325							chrI	9013945	9014350	228		chrI	10733592	10734010	218		chrI	12652001	12652560	263		chrI	9375118	9375681	325
chrI	9379405	9379900	285							chrI	9042489	9043090	375		chrI	10748039	10748979	289		chrI	12664852	12665212	175		chrI	9379405	9379900	285
chrI	9380040	9380772	291							chrI	9051098	9051558	256		chrI	10749786	10750356	274		chrI	12675001	12675758	339		chrI	9380040	9380772	291
chrI	9380880	9382242	603							chrI	9057632	9058298	395		chrI	10751412	10752436	449		chrI	12727884	12728337	244		chrI	9380880	9382242	603
chrI	9382435	9384096	348							chrI	9064042	9065177	718		chrI	10752688	10753371	223		chrI	12736435	12737121	348		chrI	9382435	9384096	348
chrI	9384228	9384725	156							chrI	9068146	9070428	1414		chrI	10753729	10754782	771		chrI	12741047	12741474	196		chrI	9384228	9384725	156
chrI	9385415	9386340	586							chrI	9075964	9076686	339		chrI	10756337	10757718	869		chrI	12815534	12816378	406		chrI	9385415	9386340	586
chrI	9390054	9390523	220							chrI	9077123	9077765	314		chrI	10761654	10762623	201		chrI	12826495	12826920	248		chrI	9390054	9390523	220
chrI	9393287	9394003	514							chrI	9079934	9080438	224		chrI	10765582	10766173	228		chrI	12858274	12858751	243		chrI	9393287	9394003	514
chrI	9398940	9399313	163							chrI	9084987	9085685	237		chrI	10767302	10768719	349		chrI	12876994	12877404	224		chrI	9398940	9399313	163
chrI	9405241	9405627	193							chrI	9092095	9092715	270		chrI	10769462	10770283	414		chrI	12920556	12921266	289		chrI	9405241	9405627	193
chrI	9422152	9422586	228							chrI	9095556	9096049	272		chrI	10772012	10772748	388		chrI	12966230	12967197	687		chrI	9422152	9422586	228
chrI	9423853	9425386	1175							chrI	9097470	9098327	313		chrI	10776258	10777836	1264		chrI	12968391	12968841	223		chrI	9423853	9425386	1175
chrI	9426025	9426574	261							chrI	9099632	9102411	1214		chrI	10795791	10796245	264		chrI	12995511	12996028	245		chrI	9426025	9426574	261
chrI	9426894	9427358	212							chrI	9110740	9111185	253		chrI	10798547	10798966	193		chrI	13006329	13006714	202		chrI	9426894	9427358	212
chrI	9427602	9428596	749							chrI	9112939	9113453	241		chrI	10830772	10831199	198		chrI	13030135	13030527	160		chrI	9427602	9428596	749
chrI	9430565	9430961	167							chrI	9121573	9122385	309		chrI	10838962	10839449	233		chrI	13031117	13031655	420		chrI	9430565	9430961	167
chrI	9445520	9446231	382							chrI	9122584	9125045	1010		chrI	10857753	10859038	290		chrI	13040443	13040886	182		chrI	9445520	9446231	382
chrI	9449859	9450412	356							chrI	9128603	9129286	303		chrI	10866456	10867011	285		chrI	13060234	13061433	300		chrI	9449859	9450412	356
chrI	9460708	9461048	177							chrI	9131688	9132322	315		chrI	10894980	10895345	171		chrI	13062529	13063029	351		chrI	9460708	9461048	177
chrI	9471070	9471504	198							chrI	9135263	9137454	688		chrI	10927303	10927807	222		chrI	13063789	13064407	280		chrI	9471070	9471504	198
chrI	9474737	9475344	216							chrI	9137671	9138599	707		chrI	10970053	10970496	229		chrI	13065533	13066184	296		chrI	9474737	9475344	216
chrI	9488035	9488481	247							chrI	9141354	9142273	447		chrI	11095488	11096139	341		chrI	13085061	13088750	674		chrI	9488035	9488481	247
chrI	9494502	9494943	226							chrI	9149095	9149705	309		chrI	11137377	11137828	249		chrI	13100103	13102808	2113		chrI	9494502	9494943	226
chrI	9495579	9495901	184							chrI	9150056	9150733	309		chrI	11182281	11182809	247		chrI	13161827	13162363	283		chrI	9495579	9495901	184
chrI	9500794	9501240	205							chrI	9152931	9154995	1886		chrI	11187074	11187488	207		chrI	13290810	13291208	215		chrI	9500794	9501240	205
chrI	9505810	9506358	321							chrI	9157243	9159014	1039		chrI	11188036	11188567	248		chrI	13297569	13297994	192		chrI	9505810	9506358	321
chrI	9512022	9512468	182							chrI	9161469	9162038	345		chrI	11198520	11198950	250		chrI	13310165	13310652	236		chrI	9512022	9512468	182
chrI	9515995	9516386	192							chrI	9163268	9163848	245		chrI	11202104	11202763	368		chrI	13317716	13318117	222		chrI	9515995	9516386	192
chrI	9550810	9551404	408							chrI	9166856	9167613	450		chrI	11236748	11237131	195		chrI	13330800	13331292	331		chrI	9550810	9551404	408
chrI	9581421	9581769	167							chrI	9172456	9173441	212		chrI	11280569	11281039	208		chrI	13337041	13337513	244		chrI	9581421	9581769	167
chrI	9601531	9601971	234							chrI	9176051	9176619	228		chrI	11323096	11323590	243		chrI	13338828	13339192	198		chrI	9601531	9601971	234
chrI	9605560	9606037	204							chrI	9177236	9178122	429		chrI	11374190	11374673	225		chrI	13350971	13351405	209		chrI	9605560	9606037	204
chrI	9619760	9620205	232							chrI	9178330	9182378	1037		chrI	11416505	11416987	262		chrI	13369657	13370131	234		chrI	9619760	9620205	232
chrI	9625819	9626288	242							chrI	9226648	9227103	237		chrI	11432722	11433162	219		chrI	13372699	13373381	404		chrI	9625819	9626288	242
chrI	9665018	9665404	202							chrI	9248820	9249659	588		chrI	11456118	11456546	224		chrI	13411339	13411826	244		chrI	9665018	9665404	202
chrI	9669048	9669486	209							chrI	9266783	9267392	322		chrI	11505348	11505755	183		chrI	13417267	13417844	215		chrI	9669048	9669486	209
chrI	9679343	9679833	270							chrI	9268729	9269266	262		chrI	11517038	11517567	273		chrI	13434335	13434780	201		chrI	9679343	9679833	270
chrI	9688689	9689133	210							chrI	9280105	9281145	648		chrI	11517838	11518484	239		chrI	13463697	13464259	254		chrI	9688689	9689133	210
chrI	9690608	9691083	179							chrI	9286483	9287037	250		chrI	11520338	11521410	757		chrI	13475476	13475880	201		chrI	9690608	9691083	179
chrI	9701752	9702119	165							chrI	9307122	9308147	574		chrI	11577417	11577965	199		chrI	13487503	13487881	211		chrI	9701752	9702119	165
chrI	9705459	9705946	244							chrI	9314295	9315930	1354		chrI	11578100	11578662	277		chrI	13488648	13489120	244		chrI	9705459	9705946	244
chrI	9706825	9707254	269							chrI	9316828	9317305	242		chrI	11590788	11591318	241		chrI	13494997	13495458	255		chrI	9706825	9707254	269
chrI	9721755	9722820	512							chrI	9319807	9320450	356		chrI	11592519	11593038	231		chrI	13496274	13496621	151		chrI	9721755	9722820	512
chrI	9725147	9725735	247							chrI	9322258	9322981	377		chrI	11595041	11595474	205		chrI	13514140	13514611	242		chrI	9725147	9725735	247
chrI	9731238	9731996	228							chrI	9327120	9328068	501		chrI	11611205	11611704	229		chrI	13547132	13547762	360		chrI	9731238	9731996	228
chrI	9736347	9736649	127							chrI	9328147	9328718	366		chrI	11674237	11675143	285		chrI	13588757	13589198	213		chrI	9736347	9736649	127
chrI	9737418	9737827	245							chrI	9331158	9331985	639		chrI	11693049	11693906	658		chrI	13610284	13612157	339		chrI	9737418	9737827	245
chrI	9739408	9739780	191							chrI	9332456	9333427	410		chrI	11728804	11729148	147		chrI	13612582	13613659	709		chrI	9739408	9739780	191
chrI	9752291	9753456	219							chrI	9343576	9344401	336		chrI	11791408	11791826	214		chrI	13626217	13626587	154		chrI	9752291	9753456	219
chrI	9767821	9768200	151							chrI	9351935	9353133	771		chrI	11792650	11793146	276		chrI	13653707	13654186	249		chrI	9767821	9768200	151
chrI	9768601	9768987	207							chrI	9353995	9356247	455		chrI	11839493	11839867	208		chrI	13659335	13659788	236		chrI	9768601	9768987	207
chrI	9787519	9788957	1167							chrI	9356327	9366291	6535		chrI	11840604	11841144	232		chrI	13663084	13663653	282		chrI	9787519	9788957	1167
chrI	9789993	9791545	1046							chrI	9368341	9369669	873		chrI	11893634	11894135	271		chrI	13688548	13688928	152		chrI	9789993	9791545	1046
chrI	9797684	9798152	230							chrI	9371263	9373917	1859		chrI	11897088	11897522	228		chrI	13756184	13756813	353		chrI	9797684	9798152	230
chrI	9799399	9800121	461							chrI	9375142	9375691	326		chrI	11929882	11930881	269		chrI	13854207	13854684	263		chrI	9799399	9800121	461
chrI	9805300	9805718	213							chrI	9378347	9380702	1961		chrI	11934047	11934588	268		chrI	13951626	13952072	199		chrI	9805300	9805718	213
chrI	9807016	9807433	182							chrI	9380859	9382056	520		chrI	11964774	11965163	187		chrI	14058619	14059160	294		chrI	9807016	9807433	182
chrI	9821422	9822987	257							chrI	9383255	9384815	613		chrI	12039457	12040555	505		chrI	14070775	14071234	242		chrI	9821422	9822987	257
chrI	9842279	9842794	212							chrI	9385156	9386387	902		chrI	12041288	12041821	247		chrI	14071745	14072176	254		chrI	9842279	9842794	212
chrI	9845313	9845783	233							chrI	9389876	9391162	419		chrI	12043433	12044637	706		chrI	14113118	14113506	179		chrI	9845313	9845783	233
chrI	9846128	9846833	386							chrI	9392783	9394592	1035		chrI	12045000	12046503	572		chrI	14180993	14181551	257		chrI	9846128	9846833	386
chrI	9852027	9853277	662							chrI	9398261	9399652	895		chrI	12065202	12066074	236		chrI	14190971	14191351	214		chrI	9852027	9853277	662
chrI	9853531	9855058	522							chrI	9399743	9400551	612		chrI	12105939	12106611	326		chrI	14193436	14193872	200		chrI	9853531	9855058	522
chrI	9855199	9855800	306							chrI	9402592	9404067	347		chrI	12164550	12165014	226		chrI	14277221	14277666	232		chrI	9855199	9855800	306
chrI	9862493	9862948	228							chrI	9404211	9406697	1263		chrI	12170562	12171092	282		chrI	14279038	14279551	252		chrI	9862493	9862948	228
chrI	9869021	9869673	272							chrI	9408136	9411436	1950		chrI	12178034	12178654	282		chrI	14281079	14281543	239		chrI	9869021	9869673	272
chrI	9870796	9871327	274							chrI	9413363	9415282	1057		chrI	12179319	12179853	259		chrI	14281641	14282081	238		chrI	9870796	9871327	274
chrI	9883436	9884066	301							chrI	9416667	9417459	402		chrI	12183038	12183495	218		chrI	14346476	14347035	287		chrI	9883436	9884066	301
chrI	9929403	9929780	207							chrI	9422101	9422636	262		chrI	12198450	12198859	183		chrI	14469095	14469559	224		chrI	9929403	9929780	207
chrI	9934328	9934720	185							chrI	9423851	9425352	871		chrI	12206428	12206935	249		chrI	14627892	14628481	265		chrI	9934328	9934720	185
chrI	9938294	9938703	206							chrI	9434641	9435521	542		chrI	12225046	12225768	438		chrI	14756315	14757091	518		chrI	9938294	9938703	206
chrI	9961976	9962427	271							chrI	9437852	9438266	181		chrI	12263346	12263741	189		chrI	14759194	14759763	307		chrI	9961976	9962427	271
chrI	9962590	9963195	335							chrI	9440147	9441409	366		chrI	12280342	12280785	220		chrI	14764741	14765236	251		chrI	9962590	9963195	335
chrI	9963649	9964086	190							chrI	9445418	9446119	467		chrI	12426698	12427052	165		chrI	14768836	14769347	271		chrI	9963649	9964086	190
chrI	9969243	9969946	298							chrI	9449297	9450558	891		chrI	12500406	12500830	180		chrI	14789900	14790294	178		chrI	9969243	9969946	298
chrI	9972986	9973461	224							chrI	9453932	9454457	343		chrI	12501201	12501812	353		chrI	14809339	14809841	213		chrI	9972986	9973461	224
chrI	9979626	9980118	257							chrI	9456167	9456740	225		chrI	12520375	12520762	183		chrI	14845490	14846006	255		chrI	9979626	9980118	257
chrI	9988768	9989176	222							chrI	9460581	9461071	255		chrI	12524092	12524982	419		chrI	14855490	14856130	289		chrI	9988768	9989176	222
chrI	10025841	10026333	229							chrI	9470964	9471590	336		chrI	12532038	12532669	264		chrI	14905185	14905590	240		chrI	10025841	10026333	229
chrI	10029986	10030496	234							chrI	9474721	9475193	193		chrI	12534426	12534838	219		chrI	14907842	14908336	231		chrI	10029986	10030496	234
chrI	10031520	10032120	334							chrI	9488013	9488558	309		chrI	12546567	12547374	238		chrI	14922524	14923076	240		chrI	10031520	10032120	334
chrI	10032445	10033790	663							chrI	9505742	9506367	404		chrI	12547801	12548435	332		chrI	14924340	14925127	421		chrI	10032445	10033790	663
chrI	10034889	10035335	276							chrI	9511931	9512474	272		chrI	12549264	12550242	616		chrI	14925930	14926411	219		chrI	10034889	10035335	276
chrI	10035897	10036867	143							chrI	9515905	9516584	276		chrI	12550918	12551604	277		chrI	14934240	14934903	478		chrI	10035897	10036867	143
chrI	10037146	10038100	627							chrI	9581372	9581774	173		chrI	12552344	12553025	344		chrI	14936514	14936967	219		chrI	10037146	10038100	627
chrI	10039647	10040823	543							chrI	9605555	9606015	265		chrI	12571578	12572734	350		chrI	14939654	14940337	311		chrI	10039647	10040823	543
chrI	10043866	10044657	201							chrI	9619776	9620209	230		chrI	12575025	12576654	830		chrI	14945194	14946209	748		chrI	10043866	10044657	201
chrI	10074688	10075142	231							chrI	9625888	9626265	187		chrI	12651986	12652547	268		chrI	14947923	14948906	776		chrI	10074688	10075142	231
chrI	10079457	10079848	198							chrI	9664996	9665412	192		chrI	12674972	12675792	353		chrI	14952494	14953592	248		chrI	10079457	10079848	198
chrI	10089105	10089519	231							chrI	9669005	9669492	241		chrI	12676058	12676600	212		chrI	14971449	14972070	309		chrI	10089105	10089519	231
chrI	10095111	10095757	398							chrI	9679245	9679855	322		chrI	12727879	12728368	230		chrI	14975521	14975874	186		chrI	10095111	10095757	398
chrI	10097134	10097740	248							chrI	9682520	9683276	195		chrI	12736511	12737173	291		chrI	15013798	15014242	204		chrI	10097134	10097740	248
chrI	10098024	10098381	121							chrI	9688645	9689154	256		chrI	12741025	12741564	227		chrI	15022940	15023300	145		chrI	10098024	10098381	121
chrI	10102321	10102663	160							chrI	9710732	9711419	236		chrI	12815570	12816334	384		chrI	15033877	15034276	216		chrI	10102321	10102663	160
chrI	10104010	10104603	307							chrI	9720783	9721286	293		chrI	12826543	12826961	221		chrI	15060278	15071358	5609		chrI	10104010	10104603	307
chrI	10105339	10105790	218							chrI	9721842	9722778	450		chrI	12858246	12858680	200		chrI	15071855	15072408	263		chrI	10105339	10105790	218
chrI	10121960	10122384	200							chrI	9725203	9725647	232		chrI	12876983	12877407	208		chrII	18790	19210	196		chrI	10121960	10122384	200
chrI	10131102	10131710	275							chrI	9743683	9744648	689		chrI	12920586	12921218	311		chrII	24334	25311	284		chrI	10131102	10131710	275
chrI	10132442	10133103	225							chrI	9747646	9748351	299		chrI	12966262	12967214	608		chrII	43583	44055	256		chrI	10132442	10133103	225
chrI	10137974	10138310	157							chrI	9750943	9751403	229		chrI	12968368	12968832	223		chrII	66258	66701	213		chrI	10137974	10138310	157
chrI	10145115	10145653	241							chrI	9752176	9752854	360		chrI	12987979	12988448	135		chrII	97979	98387	226		chrI	10145115	10145653	241
chrI	10174757	10175609	662							chrI	9757383	9758932	1320		chrI	12995508	12996019	247		chrII	155877	156359	257		chrI	10174757	10175609	662
chrI	10176205	10176566	197							chrI	9767766	9768145	198		chrI	13007518	13007944	223		chrII	160715	161695	790		chrI	10176205	10176566	197
chrI	10178193	10178620	229							chrI	9772390	9773069	288		chrI	13025625	13025989	150		chrII	216517	217015	246		chrI	10178193	10178620	229
chrI	10190875	10191230	195							chrI	9779931	9780669	257		chrI	13030980	13031770	529		chrII	221197	221724	259		chrI	10190875	10191230	195
chrI	10196908	10197535	300							chrI	9787675	9788977	1024		chrI	13036449	13036908	242		chrII	255095	255575	238		chrI	10196908	10197535	300
chrI	10204137	10205370	632							chrI	9790646	9791566	388		chrI	13040389	13040933	253		chrII	285564	286088	254		chrI	10204137	10205370	632
chrI	10205502	10206093	272							chrI	9796758	9798142	1108		chrI	13060230	13060766	344		chrII	301016	301618	200		chrI	10205502	10206093	272
chrI	10206201	10207371	712							chrI	9813155	9813840	455		chrI	13060987	13061417	229		chrII	323309	323722	145		chrI	10206201	10207371	712
chrI	10207626	10209684	1160							chrI	9816811	9818925	1678		chrI	13062498	13063040	253		chrII	347697	348123	191		chrI	10207626	10209684	1160
chrI	10211426	10211899	219							chrI	9842307	9842813	226		chrI	13063762	13064341	275		chrII	385941	386369	198		chrI	10211426	10211899	219
chrI	10212314	10216289	3074							chrI	9845167	9845787	349		chrI	13065570	13066196	323		chrII	401099	401626	298		chrI	10212314	10216289	3074
chrI	10216544	10219241	1459							chrI	9846079	9846793	426		chrI	13084935	13090174	882		chrII	410798	411303	253		chrI	10216544	10219241	1459
chrI	10232453	10232910	256							chrI	9848087	9848781	397		chrI	13097237	13102835	4982		chrII	484428	484798	227		chrI	10232453	10232910	256
chrI	10235016	10235766	338							chrI	9849082	9850022	730		chrI	13160830	13161293	261		chrII	601316	601691	188		chrI	10235016	10235766	338
chrI	10235911	10236383	249							chrI	9853393	9854513	638		chrI	13161738	13162331	382		chrII	602990	603406	206		chrI	10235911	10236383	249
chrI	10237277	10237714	195							chrI	9868984	9869635	380		chrI	13290834	13291213	227		chrII	608293	608625	129		chrI	10237277	10237714	195
chrI	10262140	10262704	298							chrI	9870799	9871347	340		chrI	13297325	13297995	405		chrII	759751	760278	240		chrI	10262140	10262704	298
chrI	10283542	10284029	208							chrI	9874225	9875316	600		chrI	13310180	13310639	243		chrII	762926	763354	235		chrI	10283542	10284029	208
chrI	10297850	10298310	209							chrI	9875937	9877028	674		chrI	13317743	13318156	164		chrII	848511	848895	218		chrI	10297850	10298310	209
chrI	10301704	10308367	1383							chrI	9882042	9882578	210		chrI	13337061	13337548	250		chrII	873344	873772	265		chrI	10301704	10308367	1383
chrI	10313654	10320676	5397							chrI	9883191	9884313	532		chrI	13338809	13339239	222		chrII	1006469	1006822	178		chrI	10313654	10320676	5397
chrI	10330429	10330829	178							chrI	9929279	9929821	279		chrI	13350999	13351441	208		chrII	1012304	1012635	187		chrI	10330429	10330829	178
chrI	10381910	10382353	154							chrI	9934249	9934726	268		chrI	13368965	13369373	248		chrII	1084795	1085397	327		chrI	10381910	10382353	154
chrI	10396184	10396533	188							chrI	9938296	9938726	212		chrI	13369616	13370096	253		chrII	1134302	1135452	615		chrI	10396184	10396533	188
chrI	10398607	10399051	236							chrI	9955785	9956238	215		chrI	13372461	13373425	672		chrII	1237746	1238404	376		chrI	10398607	10399051	236
chrI	10400542	10401039	214							chrI	9961873	9962440	240		chrI	13411278	13411813	275		chrII	1242466	1242937	261		chrI	10400542	10401039	214
chrI	10435660	10436018	209							chrI	9962675	9963189	229		chrI	13417226	13417918	224		chrII	1246692	1247328	334		chrI	10435660	10436018	209
chrI	10437829	10438152	162							chrI	9969384	9969813	221		chrI	13421018	13421387	225		chrII	1310070	1310562	221		chrI	10437829	10438152	162
chrI	10468787	10469552	207							chrI	9972994	9973493	275		chrI	13434318	13434818	235		chrII	1320385	1320887	245		chrI	10468787	10469552	207
chrI	10474565	10474999	214							chrI	9979608	9980149	298		chrI	13463673	13464327	283		chrII	1323225	1323649	192		chrI	10474565	10474999	214
chrI	10478106	10478471	207							chrI	9984851	9985245	229		chrI	13475407	13475850	276		chrII	1341324	1341937	288		chrI	10478106	10478471	207
chrI	10491034	10491373	193							chrI	9988750	9989215	261		chrI	13487530	13487979	198		chrII	1344523	1345153	279		chrI	10491034	10491373	193
chrI	10497864	10498277	202							chrI	10025563	10026464	510		chrI	13488646	13489132	225		chrII	1402181	1402613	187		chrI	10497864	10498277	202
chrI	10506313	10506766	203							chrI	10028740	10029382	232		chrI	13495030	13495505	208		chrII	1457159	1458235	222		chrI	10506313	10506766	203
chrI	10513882	10514250	199							chrI	10029636	10032021	2173		chrI	13514123	13514611	237		chrII	1501837	1502422	275		chrI	10513882	10514250	199
chrI	10516870	10517434	344							chrI	10032516	10033257	213		chrI	13547119	13547782	360		chrII	1519864	1520307	199		chrI	10516870	10517434	344
chrI	10538944	10539691	378							chrI	10034962	10035264	180		chrI	13576270	13576721	254		chrII	1661280	1661759	243		chrI	10538944	10539691	378
chrI	10541544	10541992	230							chrI	10037519	10038003	250		chrI	13628462	13628940	223		chrII	1819863	1820325	227		chrI	10541544	10541992	230
chrI	10551279	10551803	305							chrI	10039892	10040768	580		chrI	13653669	13654178	278		chrII	1851729	1852124	186		chrI	10551279	10551803	305
chrI	10553660	10554195	299							chrI	10043910	10044717	577		chrI	13659346	13659834	251		chrII	2058966	2059369	221		chrI	10553660	10554195	299
chrI	10560058	10560909	486							chrI	10045720	10046254	229		chrI	13663094	13663633	291		chrII	2190456	2190857	206		chrI	10560058	10560909	486
chrI	10562284	10562898	331							chrI	10047553	10051089	2539		chrI	13688594	13689152	202		chrII	2191344	2191798	193		chrI	10562284	10562898	331
chrI	10564973	10565568	253							chrI	10074677	10075100	223		chrI	13756265	13756833	280		chrII	2195530	2195896	196		chrI	10564973	10565568	253
chrI	10565833	10566184	166							chrI	10079366	10079939	297		chrI	13854237	13854690	237		chrII	2219848	2220348	263		chrI	10565833	10566184	166
chrI	10567435	10567793	201							chrI	10084805	10086083	565		chrI	13951617	13952125	247		chrII	2232435	2232771	197		chrI	10567435	10567793	201
chrI	10577054	10577446	162							chrI	10104019	10104550	300		chrI	14028937	14029445	269		chrII	2289390	2289910	275		chrI	10577054	10577446	162
chrI	10592954	10593301	161							chrI	10105220	10105758	364		chrI	14058701	14059082	173		chrII	2340945	2341280	226		chrI	10592954	10593301	161
chrI	10598355	10598794	225							chrI	10121934	10122379	236		chrI	14070756	14071288	294		chrII	2504421	2504845	201		chrI	10598355	10598794	225
chrI	10642213	10642666	249							chrI	10161710	10162374	313		chrI	14071672	14072203	300		chrII	2564835	2565353	247		chrI	10642213	10642666	249
chrI	10651205	10651623	211							chrI	10173022	10173465	214		chrI	14072751	14073511	268		chrII	2649023	2649405	194		chrI	10651205	10651623	211
chrI	10653380	10653844	260							chrI	10178165	10178658	255		chrI	14113111	14113560	196		chrII	2748193	2748764	311		chrI	10653380	10653844	260
chrI	10718145	10718606	272							chrI	10185549	10185993	257		chrI	14181033	14181665	269		chrII	2752493	2752919	253		chrI	10718145	10718606	272
chrI	10720077	10720585	243							chrI	10190835	10191250	221		chrI	14190926	14191353	198		chrII	2787038	2787547	255		chrI	10720077	10720585	243
chrI	10746489	10746965	147							chrI	10192773	10193142	167		chrI	14193386	14193864	258		chrII	2800744	2801241	279		chrI	10746489	10746965	147
chrI	10748065	10748858	604							chrI	10196971	10197494	243		chrI	14276481	14277717	276		chrII	2802061	2802450	211		chrI	10748065	10748858	604
chrI	10749774	10750372	286							chrI	10226399	10227177	469		chrI	14279007	14279485	306		chrII	2802793	2803315	285		chrI	10749774	10750372	286
chrI	10751331	10752436	514							chrI	10235047	10235791	284		chrI	14281065	14281542	227		chrII	2831230	2831570	135		chrI	10751331	10752436	514
chrI	10752885	10753321	261							chrI	10237216	10237670	237		chrI	14281635	14282111	265		chrII	2832071	2832534	249		chrI	10752885	10753321	261
chrI	10754381	10754796	224							chrI	10259874	10260260	168		chrI	14346467	14347097	311		chrII	2889179	2889650	217		chrI	10754381	10754796	224
chrI	10756386	10757710	739							chrI	10262215	10262651	272		chrI	14388740	14389274	287		chrII	2920741	2921246	252		chrI	10756386	10757710	739
chrI	10760178	10760726	226							chrI	10268043	10271637	2791		chrI	14391371	14391719	200		chrII	2962505	2963070	279		chrI	10760178	10760726	226
chrI	10769561	10770243	318							chrI	10297908	10298395	193		chrI	14405625	14405972	149		chrII	2971737	2972176	237		chrI	10769561	10770243	318
chrI	10772218	10772640	171							chrI	10302779	10303326	221		chrI	14469064	14469586	267		chrII	2973542	2974415	530		chrI	10772218	10772640	171
chrI	10777025	10777868	491							chrI	10318808	10319379	343		chrI	14626576	14626927	181		chrII	2975510	2976201	378		chrI	10777025	10777868	491
chrI	10795847	10796252	184							chrI	10330386	10330794	230		chrI	14627865	14628580	332		chrII	2976476	2977103	405		chrI	10795847	10796252	184
chrI	10798335	10798998	404							chrI	10333003	10333384	196		chrI	14710815	14711233	193		chrII	2987760	2988290	284		chrI	10798335	10798998	404
chrI	10807071	10807509	181							chrI	10373807	10374238	207		chrI	14725224	14725628	184		chrII	2994605	2995431	208		chrI	10807071	10807509	181
chrI	10816212	10816640	177							chrI	10398556	10398988	262		chrI	14725931	14726259	123		chrII	3076869	3077370	254		chrI	10816212	10816640	177
chrI	10830804	10831197	203							chrI	10400458	10401063	306		chrI	14756263	14757164	542		chrII	3209224	3209666	204		chrI	10830804	10831197	203
chrI	10838972	10839409	202							chrI	10414193	10415437	912		chrI	14759122	14759795	389		chrII	3270601	3270985	197		chrI	10838972	10839409	202
chrI	10857787	10859015	245							chrI	10415993	10416867	233		chrI	14764590	14765337	412		chrII	3428152	3428516	243		chrI	10857787	10859015	245
chrI	10866470	10866954	242							chrI	10435676	10436007	180		chrI	14768777	14769382	312		chrII	3439213	3439993	187		chrI	10866470	10866954	242
chrI	10894903	10895381	226							chrI	10468734	10469503	209		chrI	14789872	14790305	195		chrII	3482243	3482659	187		chrI	10894903	10895381	226
chrI	10927336	10927792	247							chrI	10474559	10475007	206		chrI	14845468	14845994	292		chrII	3502615	3503094	223		chrI	10927336	10927792	247
chrI	10970082	10970461	189							chrI	10478115	10478445	133		chrI	14855516	14855991	277		chrII	3518869	3519556	357		chrI	10970082	10970461	189
chrI	11038713	11039108	227							chrI	10516742	10517447	466		chrI	14864924	14865619	248		chrII	3521315	3521832	265		chrI	11038713	11039108	227
chrI	11095616	11096287	237							chrI	10517908	10518314	199		chrI	14899281	14899672	118		chrII	3523494	3523991	255		chrI	11095616	11096287	237
chrI	11135700	11136000	123							chrI	10538923	10539612	472		chrI	14902742	14903173	204		chrII	3547295	3547695	193		chrI	11135700	11136000	123
chrI	11137412	11137815	195							chrI	10549571	10550058	218		chrI	14907826	14908352	254		chrII	3553461	3553813	213		chrI	11137412	11137815	195
chrI	11182317	11182752	216							chrI	10551260	10551792	303		chrI	14922474	14923056	279		chrII	3567561	3567969	220		chrI	11182317	11182752	216
chrI	11188106	11188474	162							chrI	10553711	10554181	237		chrI	14924383	14925101	325		chrII	3682766	3683181	197		chrI	11188106	11188474	162
chrI	11202184	11202771	295							chrI	10560023	10560587	338		chrI	14925913	14926856	274		chrII	3808088	3808453	215		chrI	11202184	11202771	295
chrI	11203215	11203627	188							chrI	10562362	10562867	249		chrI	14934281	14934904	246		chrII	3810560	3810999	236		chrI	11203215	11203627	188
chrI	11323146	11323562	211							chrI	10564987	10566219	223		chrI	14935344	14935759	172		chrII	3816220	3816673	228		chrI	11323146	11323562	211
chrI	11374225	11374647	209							chrI	10567410	10567865	238		chrI	14939528	14940429	443		chrII	3848234	3848696	216		chrI	11374225	11374647	209
chrI	11384228	11384753	284							chrI	10577002	10577558	213		chrI	14945175	14946207	658		chrII	3851092	3851594	287		chrI	11384228	11384753	284
chrI	11384962	11385759	515							chrI	10591537	10591911	182		chrI	14947925	14948950	280		chrII	3852719	3853072	216		chrI	11384962	11385759	515
chrI	11416548	11416950	209							chrI	10592868	10593374	268		chrI	14952325	14953453	885		chrII	3854676	3855134	226		chrI	11416548	11416950	209
chrI	11432763	11433169	213							chrI	10598336	10598808	231		chrI	14971410	14972079	366		chrII	3865689	3866218	231		chrI	11432763	11433169	213
chrI	11456128	11456568	224							chrI	10622765	10623093	142		chrI	14975521	14975876	171		chrII	3896913	3897408	259		chrI	11456128	11456568	224
chrI	11497798	11498162	170							chrI	10642248	10642668	224		chrI	15033886	15034311	209		chrII	3897720	3898225	241		chrI	11497798	11498162	170
chrI	11505375	11505742	152							chrI	10651204	10651638	222		chrI	15052618	15052950	113		chrII	3930597	3931321	309		chrI	11505375	11505742	152
chrI	11517118	11517564	207							chrI	10653299	10653849	350		chrI	15060295	15071341	4193		chrII	3951325	3951774	238		chrI	11517118	11517564	207
chrI	11517844	11518406	313							chrI	10666908	10667271	185		chrII	18763	19217	262		chrII	3956815	3957164	178		chrI	11517844	11518406	313
chrI	11520457	11521409	643							chrI	10717992	10718625	394		chrII	24406	24916	245		chrII	3958464	3959470	455		chrI	11520457	11521409	643
chrI	11577206	11578036	434							chrI	10720086	10720670	237		chrII	43607	44039	243		chrII	3960306	3960748	231		chrI	11577206	11578036	434
chrI	11578136	11578623	241							chrI	10728611	10729063	228		chrII	66272	66701	222		chrII	4044304	4044809	268		chrI	11578136	11578623	241
chrI	11589116	11589555	194							chrI	10730043	10730570	266		chrII	73321	74145	241		chrII	4047818	4048308	255		chrI	11589116	11589555	194
chrI	11590771	11591499	274							chrI	10733568	10734005	281		chrII	97926	98429	270		chrII	4049668	4050068	198		chrI	11590771	11591499	274
chrI	11592565	11592993	239							chrI	10736418	10737083	441		chrII	155841	156363	281		chrII	4089088	4089663	270		chrI	11592565	11592993	239
chrI	11595050	11595437	185							chrI	10738790	10740662	1229		chrII	216506	217004	262		chrII	4090734	4091126	199		chrI	11595050	11595437	185
chrI	11611254	11611652	193							chrI	10741653	10742427	381		chrII	221143	221692	282		chrII	4133335	4133749	211		chrI	11611254	11611652	193
chrI	11664733	11665221	219							chrI	10743500	10744680	938		chrII	255093	255587	233		chrII	4134672	4135033	164		chrI	11664733	11665221	219
chrI	11670151	11670577	235							chrI	10745221	10746980	1402		chrII	285578	286508	260		chrII	4276979	4277319	134		chrI	11670151	11670577	235
chrI	11692149	11692649	183							chrI	10748089	10748929	319		chrII	300988	301599	221		chrII	4291836	4292227	143		chrI	11692149	11692649	183
chrI	11693108	11693897	574							chrI	10749834	10750273	193		chrII	323223	323818	268		chrII	4294225	4294612	191		chrI	11693108	11693897	574
chrI	11784412	11784720	170							chrI	10769656	10770273	289		chrII	347650	348206	289		chrII	4299179	4299703	268		chrI	11784412	11784720	170
chrI	11792683	11793106	246							chrI	10776217	10777866	1373		chrII	385949	386406	196		chrII	4376443	4377141	459		chrI	11792683	11793106	246
chrI	11839468	11839858	179							chrI	10780435	10780866	225		chrII	401130	401653	271		chrII	4419859	4420332	219		chrI	11839468	11839858	179
chrI	11840583	11841158	296							chrI	10782820	10783530	208		chrII	410804	411334	260		chrII	4455949	4456668	344		chrI	11840583	11841158	296
chrI	11893671	11894069	202							chrI	10788598	10789125	232		chrII	484420	484785	169		chrII	4494518	4494915	217		chrI	11893671	11894069	202
chrI	11897121	11897465	149							chrI	10795756	10796269	317		chrII	506017	506457	243		chrII	4505003	4505500	266		chrI	11897121	11897465	149
chrI	11929883	11930870	243							chrI	10798211	10799068	555		chrII	591824	592200	133		chrII	4506420	4507111	269		chrI	11929883	11930870	243
chrI	11934092	11934548	209							chrI	10806896	10807507	319		chrII	601295	601736	244		chrII	4518266	4518786	261		chrI	11934092	11934548	209
chrI	11939934	11940355	204							chrI	10816230	10816638	220		chrII	602988	603416	200		chrII	4519852	4520512	273		chrI	11939934	11940355	204
chrI	11964756	11965116	171							chrI	10857834	10858718	274		chrII	622494	622919	239		chrII	4573227	4573576	166		chrI	11964756	11965116	171
chrI	12039431	12040659	491							chrI	10871495	10871910	155		chrII	650386	650734	128		chrII	4574093	4574990	269		chrI	12039431	12040659	491
chrI	12044987	12045748	480							chrI	10894940	10895309	188		chrII	759702	760373	362		chrII	4602959	4603430	279		chrI	12044987	12045748	480
chrI	12065214	12066045	205							chrI	10927293	10927800	225		chrII	760671	761068	184		chrII	4606756	4607125	208		chrI	12065214	12066045	205
chrI	12106030	12106638	357							chrI	10970091	10970495	192		chrII	762930	763409	283		chrII	4698223	4698683	243		chrI	12106030	12106638	357
chrI	12164506	12165094	318							chrI	11038656	11039112	242		chrII	773916	774285	167		chrII	4701234	4702016	507		chrI	12164506	12165094	318
chrI	12170670	12171091	216							chrI	11074770	11076011	788		chrII	848500	848864	224		chrII	4736658	4737022	174		chrI	12170670	12171091	216
chrI	12178084	12178645	231							chrI	11182268	11182803	260		chrII	873196	873826	427		chrII	4739957	4740428	196		chrI	12178084	12178645	231
chrI	12179274	12179820	281							chrI	11188113	11188495	183		chrII	1084859	1085380	250		chrII	4745191	4745704	235		chrI	12179274	12179820	281
chrI	12198409	12198804	203							chrI	11202142	11202717	300		chrII	1088514	1088968	226		chrII	4747687	4748147	252		chrI	12198409	12198804	203
chrI	12206506	12206874	185							chrI	11211509	11212573	510		chrII	1134340	1135565	723		chrII	4748392	4748947	268		chrI	12206506	12206874	185
chrI	12225215	12225770	295							chrI	11212818	11213349	283		chrII	1208575	1209037	233		chrII	4759649	4760221	330		chrI	12225215	12225770	295
chrI	12286457	12286794	194							chrI	11221852	11222521	325		chrII	1242467	1242877	227		chrII	4761029	4761458	229		chrI	12286457	12286794	194
chrI	12426646	12427031	198							chrI	11323085	11323577	271		chrII	1246734	1247362	329		chrII	4769116	4769588	235		chrI	12426646	12427031	198
chrI	12500373	12500786	191							chrI	11374206	11374700	220		chrII	1310091	1310555	231		chrII	4791286	4791716	232		chrI	12500373	12500786	191
chrI	12501228	12501808	242							chrI	11384285	11384723	201		chrII	1320357	1320888	273		chrII	4805838	4806569	523		chrI	12501228	12501808	242
chrI	12524180	12525056	321							chrI	11384971	11385514	503		chrII	1323232	1323677	197		chrII	4851517	4852068	292		chrI	12524180	12525056	321
chrI	12532045	12532588	243							chrI	11416539	11416981	209		chrII	1341367	1341953	244		chrII	4855387	4856596	937		chrI	12532045	12532588	243
chrI	12534385	12534803	256							chrI	11497794	11498132	148		chrII	1344427	1345215	359		chrII	4881684	4882204	212		chrI	12534385	12534803	256
chrI	12544532	12545324	196							chrI	11505289	11505753	241		chrII	1402203	1402641	205		chrII	4888800	4889288	253		chrI	12544532	12545324	196
chrI	12546570	12547379	464							chrI	11516986	11517622	320		chrII	1437608	1437951	163		chrII	4904154	4904698	278		chrI	12546570	12547379	464
chrI	12547721	12548502	471							chrI	11520881	11521251	183		chrII	1456359	1456652	31		chrII	4906405	4906893	245		chrI	12547721	12548502	471
chrI	12549159	12550242	726							chrI	11578106	11578647	269		chrII	1501858	1502432	324		chrII	4907181	4907742	357		chrI	12549159	12550242	726
chrI	12550914	12551633	284							chrI	11579552	11579976	198		chrII	1519924	1520366	180		chrII	4908087	4908609	229		chrI	12550914	12551633	284
chrI	12552237	12553061	600							chrI	11584594	11585698	861		chrII	1530213	1530715	195		chrII	4941422	4942049	340		chrI	12552237	12553061	600
chrI	12554265	12554632	174							chrI	11611249	11611782	222		chrII	1661265	1661763	256		chrII	4942325	4943120	196		chrI	12554265	12554632	174
chrI	12571489	12572675	473							chrI	11649367	11649778	185		chrII	1819847	1820352	288		chrII	4982028	4982403	224		chrI	12571489	12572675	473
chrI	12575213	12576680	642							chrI	11680821	11681403	287		chrII	2058934	2059398	287		chrII	4999106	4999557	214		chrI	12575213	12576680	642
chrI	12652005	12652542	249							chrI	11693234	11693974	446		chrII	2189546	2189909	120		chrII	5017004	5017760	383		chrI	12652005	12652542	249
chrI	12654526	12654992	251							chrI	11763394	11764345	649		chrII	2190357	2190925	278		chrII	5019321	5019802	212		chrI	12654526	12654992	251
chrI	12675009	12676639	364							chrI	11792627	11793180	304		chrII	2191311	2191828	259		chrII	5049276	5049692	183		chrI	12675009	12676639	364
chrI	12677700	12678016	163							chrI	11839310	11839846	331		chrII	2195540	2195973	212		chrII	5055134	5055598	226		chrI	12677700	12678016	163
chrI	12678351	12679114	180							chrI	11840609	11841315	285		chrII	2197462	2197906	239		chrII	5057274	5057706	236		chrI	12678351	12679114	180
chrI	12727903	12728300	232							chrI	11893624	11894126	252		chrII	2204038	2204496	234		chrII	5061759	5062191	180		chrI	12727903	12728300	232
chrI	12736505	12737059	313							chrI	11897101	11897497	233		chrII	2219844	2220367	243		chrII	5081251	5081599	90		chrI	12736505	12737059	313
chrI	12741050	12741426	195							chrI	11910821	11911260	228		chrII	2289429	2289899	210		chrII	5092295	5092783	240		chrI	12741050	12741426	195
chrI	12782272	12783146	309							chrI	11929903	11930810	242		chrII	2442174	2442603	211		chrII	5105007	5105464	250		chrI	12782272	12783146	309
chrI	12815582	12816338	382							chrI	11964778	11965137	172		chrII	2504397	2504803	243		chrII	5181325	5182032	346		chrI	12815582	12816338	382
chrI	12826485	12826994	236							chrI	11978530	11979053	236		chrII	2564841	2565339	230		chrII	5182330	5182932	300		chrI	12826485	12826994	236
chrI	12858322	12858747	174							chrI	12004764	12005156	168		chrII	2638051	2638453	181		chrII	5200953	5201400	248		chrI	12858322	12858747	174
chrI	12920578	12921248	251							chrI	12037032	12037452	227		chrII	2648975	2649433	206		chrII	5201891	5202391	223		chrI	12920578	12921248	251
chrI	12966298	12967170	626							chrI	12038772	12041017	1105		chrII	2734771	2735143	173		chrII	5237656	5238025	216		chrI	12966298	12967170	626
chrI	12968397	12968831	224							chrI	12043622	12044596	418		chrII	2748162	2748803	294		chrII	5246765	5247172	212		chrI	12968397	12968831	224
chrI	12995533	12995993	231							chrI	12044959	12046245	665		chrII	2787007	2787560	265		chrII	5271904	5272334	197		chrI	12995533	12995993	231
chrI	13025634	13026084	121							chrI	12047488	12048245	546		chrII	2800726	2801261	256		chrII	5273209	5273642	149		chrI	13025634	13026084	121
chrI	13030052	13030576	216							chrI	12059810	12060352	345		chrII	2802042	2802479	222		chrII	5276662	5277252	275		chrI	13030052	13030576	216
chrI	13036491	13036888	191							chrI	12065237	12066155	637		chrII	2802840	2803282	202		chrII	5281096	5281682	232		chrI	13036491	13036888	191
chrI	13038859	13039193	167							chrI	12106018	12106627	297		chrII	2804251	2804736	218		chrII	5282145	5282579	225		chrI	13038859	13039193	167
chrI	13040373	13040875	280							chrI	12164600	12165007	205		chrII	2831206	2831581	239		chrII	5299556	5299964	203		chrI	13040373	13040875	280
chrI	13041565	13041902	138							chrI	12179329	12179798	247		chrII	2832184	2832597	184		chrII	5301727	5302331	290		chrI	13041565	13041902	138
chrI	13060306	13060772	220							chrI	12183034	12183509	230		chrII	2861417	2861800	173		chrII	5304935	5305444	340		chrI	13060306	13060772	220
chrI	13060956	13061394	281							chrI	12198350	12198884	252		chrII	2889131	2889673	264		chrII	5308945	5309380	236		chrI	13060956	13061394	281
chrI	13062532	13062961	254							chrI	12206437	12206910	215		chrII	2920752	2921238	220		chrII	5321657	5322439	616		chrI	13062532	13062961	254
chrI	13063892	13064371	253							chrI	12225274	12225774	171		chrII	2962413	2963060	341		chrII	5323697	5324157	233		chrI	13063892	13064371	253
chrI	13065551	13066215	333							chrI	12229049	12229588	337		chrII	2970347	2970857	250		chrII	5326063	5326801	347		chrI	13065551	13066215	333
chrI	13084114	13090819	2433							chrI	12486635	12487120	276		chrII	2971679	2972229	273		chrII	5327790	5328142	191		chrI	13084114	13090819	2433
chrI	13097281	13103234	4837							chrI	12508131	12508607	206		chrII	2973537	2974575	549		chrII	5328821	5329540	253		chrI	13097281	13103234	4837
chrI	13161723	13162201	243							chrI	12524179	12525076	301		chrII	2975585	2976215	217		chrII	5330020	5330683	295		chrI	13161723	13162201	243
chrI	13230910	13231732	252							chrI	12531945	12532684	367		chrII	2976356	2978516	498		chrII	5334634	5336525	1480		chrI	13230910	13231732	252
chrI	13297403	13297977	349							chrI	12534331	12534865	277		chrII	2987769	2988319	289		chrII	5336613	5338031	392		chrI	13297403	13297977	349
chrI	13310228	13310674	192							chrI	12541970	12542604	194		chrII	2994594	2995359	224		chrII	5338215	5338714	289		chrI	13310228	13310674	192
chrI	13317741	13318137	185							chrI	12546122	12547263	701		chrII	3076880	3077359	241		chrII	5346289	5346891	318		chrI	13317741	13318137	185
chrI	13323620	13324253	312							chrI	12547837	12548495	307		chrII	3209201	3209679	248		chrII	5347103	5347561	242		chrI	13323620	13324253	312
chrI	13330843	13331364	322							chrI	12550975	12551682	202		chrII	3265094	3266123	706		chrII	5350241	5350752	270		chrI	13330843	13331364	322
chrI	13337003	13337537	291							chrI	12552034	12553357	550		chrII	3270571	3271063	286		chrII	5358186	5358618	230		chrI	13337003	13337537	291
chrI	13338829	13339220	184							chrI	12554179	12557779	325		chrII	3428129	3428537	253		chrII	5373185	5373673	243		chrI	13338829	13339220	184
chrI	13359610	13360066	227							chrI	12557997	12560112	1008		chrII	3439180	3439841	261		chrII	5377722	5378529	538		chrI	13359610	13360066	227
chrI	13367557	13367939	182							chrI	12560382	12561221	306		chrII	3482189	3482671	283		chrII	5389859	5390358	265		chrI	13367557	13367939	182
chrI	13372781	13373410	310							chrI	12562645	12563232	236		chrII	3502602	3503105	251		chrII	5425992	5426346	216		chrI	13372781	13373410	310
chrI	13384534	13384906	155							chrI	12563523	12564707	701		chrII	3518959	3519524	263		chrII	5463783	5464267	215		chrI	13384534	13384906	155
chrI	13390944	13391647	346							chrI	12564843	12566655	719		chrII	3521324	3521849	260		chrII	5473942	5474342	200		chrI	13390944	13391647	346
chrI	13411335	13411804	250							chrI	12571500	12572198	438		chrII	3523490	3523982	224		chrII	5511558	5512219	335		chrI	13411335	13411804	250
chrI	13417150	13417854	210							chrI	12575268	12576742	626		chrII	3547222	3547800	285		chrII	5543261	5544473	339		chrI	13417150	13417854	210
chrI	13434284	13434821	247							chrI	12601412	12601960	348		chrII	3553431	3553844	215		chrII	5572088	5572514	169		chrI	13434284	13434821	247
chrI	13463709	13464208	238							chrI	12651913	12652524	374		chrII	3682731	3683143	200		chrII	5577011	5577420	232		chrI	13463709	13464208	238
chrI	13475438	13475852	186							chrI	12654533	12655021	218		chrII	3808085	3808521	212		chrII	5593432	5593915	301		chrI	13475438	13475852	186
chrI	13487542	13487956	197							chrI	12664812	12665259	217		chrII	3810524	3811064	292		chrII	5599480	5600035	239		chrI	13487542	13487956	197
chrI	13488595	13489100	259							chrI	12675022	12675651	342		chrII	3816194	3816670	227		chrII	5605296	5606079	327		chrI	13488595	13489100	259
chrI	13494978	13495500	243							chrI	12678315	12679255	771		chrII	3865736	3866144	166		chrII	5649494	5649831	137		chrI	13494978	13495500	243
chrI	13502781	13503210	228							chrI	12682571	12683007	224		chrII	3896880	3897462	276		chrII	5660779	5662804	451		chrI	13502781	13503210	228
chrI	13514156	13514599	214							chrI	12727891	12728350	224		chrII	3897710	3898233	269		chrII	5663014	5663887	519		chrI	13514156	13514599	214
chrI	13547143	13547951	328							chrI	12732720	12733137	230		chrII	3930596	3931347	465		chrII	5698141	5698679	283		chrI	13547143	13547951	328
chrI	13588753	13589288	228							chrI	12736623	12737074	190		chrII	3948498	3948894	196		chrII	5701374	5701840	246		chrI	13588753	13589288	228
chrI	13610088	13613563	3005							chrI	12741045	12741491	235		chrII	3951314	3951798	235		chrII	5702595	5703132	281		chrI	13610088	13613563	3005
chrI	13613912	13614504	351							chrI	12787461	12787915	193		chrII	3952490	3953620	642		chrII	5708137	5708611	220		chrI	13613912	13614504	351
chrI	13626186	13626573	183							chrI	12806437	12806947	217		chrII	3954832	3955335	271		chrII	5714769	5715188	215		chrI	13626186	13626573	183
chrI	13628470	13628896	180							chrI	12815616	12816249	365		chrII	3956629	3957199	350		chrII	5723651	5724177	154		chrI	13628470	13628896	180
chrI	13653736	13654131	215							chrI	12826453	12826948	238		chrII	3958258	3960172	671		chrII	5724932	5725587	369		chrI	13653736	13654131	215
chrI	13659327	13659806	255							chrI	12858288	12858919	224		chrII	3960290	3960804	231		chrII	5727711	5728119	177		chrI	13659327	13659806	255
chrI	13663091	13663625	296							chrI	12877046	12877391	154		chrII	3961184	3961725	290		chrII	5772727	5773174	185		chrI	13663091	13663625	296
chrI	13688549	13688971	160							chrI	12903877	12904213	194		chrII	4044329	4044795	235		chrII	5779694	5780447	364		chrI	13688549	13688971	160
chrI	13756287	13756836	274							chrI	12966333	12967147	611		chrII	4047822	4048345	243		chrII	5781750	5782888	420		chrI	13756287	13756836	274
chrI	13854087	13854577	362							chrI	12968440	12968808	176		chrII	4049657	4050116	237		chrII	5820183	5820679	283		chrI	13854087	13854577	362
chrI	13858455	13859380	243							chrI	12995453	12996066	309		chrII	4089074	4089677	299		chrII	5836352	5836712	197		chrI	13858455	13859380	243
chrI	13951667	13951999	188							chrI	13021011	13021521	191		chrII	4090725	4091179	185		chrII	5844443	5845313	363		chrI	13951667	13951999	188
chrI	14029015	14029400	197							chrI	13025570	13026121	260		chrII	4133288	4133761	284		chrII	5873544	5874501	749		chrI	14029015	14029400	197
chrI	14058694	14059134	235							chrI	13031078	13031685	471		chrII	4134663	4135093	229		chrII	5885910	5886360	245		chrI	14058694	14059134	235
chrI	14070823	14071243	210							chrI	13040397	13040882	226		chrII	4299141	4299702	289		chrII	5889161	5890205	284		chrI	14070823	14071243	210
chrI	14071638	14072217	329							chrI	13045406	13047835	316		chrII	4376450	4377123	406		chrII	5901471	5902261	337		chrI	14071638	14072217	329
chrI	14072810	14073356	241							chrI	13048086	13048863	296		chrII	4419938	4420310	189		chrII	5930042	5930570	316		chrI	14072810	14073356	241
chrI	14074294	14074686	177							chrI	13053716	13055807	1089		chrII	4455859	4456652	473		chrII	5932055	5932762	427		chrI	14074294	14074686	177
chrI	14113129	14113677	215							chrI	13060268	13061375	934		chrII	4457160	4457515	157		chrII	5948509	5949244	355		chrI	14113129	14113677	215
chrI	14181044	14181717	268							chrI	13065594	13066293	313		chrII	4485455	4485952	273		chrII	5949454	5950232	210		chrI	14181044	14181717	268
chrI	14190995	14191322	141							chrI	13085362	13085870	226		chrII	4504966	4505419	310		chrII	5951275	5952658	1108		chrI	14190995	14191322	141
chrI	14193462	14193844	166							chrI	13160884	13161290	225		chrII	4506438	4507133	319		chrII	5955680	5956399	383		chrI	14193462	14193844	166
chrI	14198054	14198359	153							chrI	13297465	13298162	298		chrII	4518263	4518761	271		chrII	5962155	5963151	254		chrI	14198054	14198359	153
chrI	14260500	14260811	147							chrI	13310049	13310797	353		chrII	4519928	4520560	280		chrII	5964964	5966164	589		chrI	14260500	14260811	147
chrI	14276500	14277705	968							chrI	13323952	13324408	298		chrII	4574067	4574578	263		chrII	5966505	5967009	256		chrI	14276500	14277705	968
chrI	14279065	14279489	244							chrI	13324828	13325152	149		chrII	4576180	4576856	140		chrII	6026696	6027050	99		chrI	14279065	14279489	244
chrI	14281044	14281496	246							chrI	13330815	13331428	370		chrII	4602963	4603452	244		chrII	6028631	6029023	198		chrI	14281044	14281496	246
chrI	14281646	14282102	228							chrI	13337067	13337489	193		chrII	4672566	4673059	266		chrII	6046003	6046368	117		chrI	14281646	14282102	228
chrI	14346484	14347164	315							chrI	13338803	13339233	232		chrII	4698225	4698665	238		chrII	6047584	6048062	246		chrI	14346484	14347164	315
chrI	14388745	14389296	272							chrI	13345190	13345684	233		chrII	4701223	4702015	465		chrII	6061485	6061887	162		chrI	14388745	14389296	272
chrI	14469091	14469547	240							chrI	13350975	13351430	200		chrII	4706312	4706701	217		chrII	6121566	6122068	253		chrI	14469091	14469547	240
chrI	14528599	14529011	228							chrI	13358795	13360227	1017		chrII	4728661	4729050	235		chrII	6138088	6138536	275		chrI	14528599	14529011	228
chrI	14530861	14531184	111							chrI	13372749	13373437	359		chrII	4739954	4740427	227		chrII	6139442	6139894	199		chrI	14530861	14531184	111
chrI	14532960	14533236	131							chrI	13384443	13385005	264		chrII	4745217	4745667	202		chrII	6148186	6148905	402		chrI	14532960	14533236	131
chrI	14534238	14534762	396							chrI	13390726	13391670	580		chrII	4759741	4760262	276		chrII	6149343	6149856	253		chrI	14534238	14534762	396
chrI	14605880	14606305	214							chrI	13411275	13411824	354		chrII	4791238	4791716	270		chrII	6174752	6175426	334		chrI	14605880	14606305	214
chrI	14627896	14628477	270							chrI	13421042	13421359	197		chrII	4805862	4807066	550		chrII	6176202	6177075	559		chrI	14627896	14628477	270
chrI	14642468	14642876	202							chrI	13422397	13423163	210		chrII	4851550	4852083	275		chrII	6248435	6248876	213		chrI	14642468	14642876	202
chrI	14651457	14651976	240							chrI	13428547	13428986	223		chrII	4854972	4856614	1338		chrII	6250718	6251176	226		chrI	14651457	14651976	240
chrI	14656941	14657458	319							chrI	13434265	13434805	270		chrII	4881718	4882167	183		chrII	6269677	6270260	324		chrI	14656941	14657458	319
chrI	14686929	14687410	312							chrI	13463663	13464384	257		chrII	4888755	4889276	253		chrII	6290159	6290663	290		chrI	14686929	14687410	312
chrI	14710836	14711203	183							chrI	13470218	13470677	228		chrII	4904154	4904730	288		chrII	6320952	6321379	220		chrI	14710836	14711203	183
chrI	14725234	14725565	178							chrI	13475504	13475825	161		chrII	4907184	4907700	191		chrII	6331321	6331857	260		chrI	14725234	14725565	178
chrI	14725892	14726254	149							chrI	13487536	13488028	192		chrII	4925376	4925798	181		chrII	6345623	6348823	2921		chrI	14725892	14726254	149
chrI	14756293	14757046	525							chrI	13488628	13489116	244		chrII	4941411	4942096	365		chrII	6355604	6356167	231		chrI	14756293	14757046	525
chrI	14759120	14759759	383							chrI	13495020	13495361	234		chrII	4999098	4999558	235		chrII	6370065	6370564	246		chrI	14759120	14759759	383
chrI	14764763	14765350	263							chrI	13514139	13514659	240		chrII	5017041	5017880	319		chrII	6379081	6379536	287		chrI	14764763	14765350	263
chrI	14768816	14769332	244							chrI	13528109	13528447	150		chrII	5019333	5019656	163		chrII	6448212	6449115	580		chrI	14768816	14769332	244
chrI	14789870	14790252	196							chrI	13547171	13547817	198		chrII	5032532	5033050	245		chrII	6489705	6490176	253		chrI	14789870	14790252	196
chrI	14839683	14840065	185							chrI	13559566	13560099	234		chrII	5042437	5042801	183		chrII	6491430	6492356	436		chrI	14839683	14840065	185
chrI	14845480	14845963	272							chrI	13571978	13572328	152		chrII	5046148	5047117	400		chrII	6535904	6536291	229		chrI	14845480	14845963	272
chrI	14855460	14856146	358							chrI	13588739	13589249	231		chrII	5049232	5049700	199		chrII	6561984	6562568	267		chrI	14855460	14856146	358
chrI	14864890	14865315	183							chrI	13610188	13611557	1152		chrII	5055075	5055628	266		chrII	6565069	6565448	196		chrI	14864890	14865315	183
chrI	14898629	14899056	181							chrI	13611661	13612111	26		chrII	5057271	5057712	265		chrII	6588732	6589694	318		chrI	14898629	14899056	181
chrI	14902745	14903157	204							chrI	13612345	13612682	138		chrII	5061763	5062188	178		chrII	6600958	6601356	202		chrI	14902745	14903157	204
chrI	14907888	14908284	200							chrI	13612903	13613514	348		chrII	5081235	5081609	152		chrII	6609364	6609782	250		chrI	14907888	14908284	200
chrI	14917372	14917727	169							chrI	13628459	13628873	207		chrII	5092290	5092822	237		chrII	6683580	6684031	262		chrI	14917372	14917727	169
chrI	14922491	14923092	312							chrI	13653777	13654096	205		chrII	5104975	5105450	247		chrII	6689078	6689433	150		chrI	14922491	14923092	312
chrI	14924388	14925038	295							chrI	13659436	13659758	146		chrII	5181337	5182044	318		chrII	6705784	6706186	174		chrI	14924388	14925038	295
chrI	14925798	14927197	374							chrI	13663114	13663628	281		chrII	5182333	5182870	279		chrII	6707406	6708150	264		chrI	14925798	14927197	374
chrI	14928060	14928421	130							chrI	13694750	13695171	189		chrII	5184940	5185571	387		chrII	6708782	6709970	362		chrI	14928060	14928421	130
chrI	14934329	14934857	279							chrI	13756346	13756783	205		chrII	5201895	5202453	252		chrII	6712257	6712891	315		chrI	14934329	14934857	279
chrI	14936580	14936915	117							chrI	13835000	13835435	198		chrII	5226253	5226732	366		chrII	6721555	6722060	160		chrI	14936580	14936915	117
chrI	14939615	14940397	358							chrI	13839928	13840253	175		chrII	5246789	5247185	205		chrII	6729278	6729690	236		chrI	14939615	14940397	358
chrI	14941584	14942043	228							chrI	13854101	13854627	350		chrII	5271854	5272423	247		chrII	6741346	6741788	203		chrI	14941584	14942043	228
chrI	14945281	14946141	620							chrI	13858585	13859431	632		chrII	5276595	5277351	302		chrII	6745786	6746194	198		chrI	14945281	14946141	620
chrI	14947815	14948773	404							chrI	14028867	14029421	316		chrII	5281169	5281606	195		chrII	6776317	6777043	461		chrI	14947815	14948773	404
chrI	14952310	14953487	938							chrI	14058578	14059178	349		chrII	5282197	5283201	200		chrII	6782553	6783212	254		chrI	14952310	14953487	938
chrI	14971485	14972063	305							chrI	14100988	14101443	217		chrII	5292119	5292644	201		chrII	6800220	6800670	210		chrI	14971485	14972063	305
chrI	14975563	14975862	188							chrI	14113031	14113687	314		chrII	5299563	5300018	201		chrII	6808248	6808963	347		chrI	14975563	14975862	188
chrI	14991612	14992005	214							chrI	14162628	14163597	752		chrII	5301652	5302262	285		chrII	6812392	6812868	223		chrI	14991612	14992005	214
chrI	15013842	15014193	188							chrI	14171745	14172657	531		chrII	5304994	5305423	261		chrII	6820906	6821615	405		chrI	15013842	15014193	188
chrI	15033918	15034256	167							chrI	14179575	14179987	207		chrII	5308827	5309345	313		chrII	6821733	6822946	759		chrI	15033918	15034256	167
chrI	15052541	15052996	182							chrI	14181009	14181914	320		chrII	5320079	5320771	324		chrII	6823102	6823596	259		chrI	15052541	15052996	182
chrI	15060287	15071349	6239							chrI	14271112	14271933	509		chrII	5321657	5322423	630		chrII	6823757	6824893	307		chrI	15060287	15071349	6239
chrI	15071848	15072400	322							chrI	14346499	14347145	305		chrII	5323748	5324146	165		chrII	6825617	6826234	335		chrI	15071848	15072400	322
chrII	18713	19310	321							chrI	14358299	14358739	175		chrII	5326051	5327234	333		chrII	6826634	6827838	933		chrII	18713	19310	321
chrII	24448	24887	195							chrI	14405535	14405989	222		chrII	5327384	5328202	581		chrII	6833799	6834520	265		chrII	24448	24887	195
chrII	73341	74196	182							chrI	14469059	14469537	265		chrII	5328730	5329369	371		chrII	6835387	6836643	303		chrII	73341	74196	182
chrII	97920	98400	247							chrI	14496404	14496728	165		chrII	5330007	5330622	311		chrII	6837010	6837685	530		chrII	97920	98400	247
chrII	155906	156297	203							chrI	14528698	14529094	159		chrII	5334713	5337961	2310		chrII	6838132	6839473	1038		chrII	155906	156297	203
chrII	160745	161649	738							chrI	14546592	14547437	589		chrII	5338224	5338956	210		chrII	6842220	6845305	605		chrII	160745	161649	738
chrII	173806	174226	221							chrI	14560174	14560601	172		chrII	5346232	5346869	380		chrII	6847907	6848591	280		chrII	173806	174226	221
chrII	216541	216960	223							chrI	14565335	14566248	689		chrII	5350211	5350765	264		chrII	6849096	6849771	362		chrII	216541	216960	223
chrII	221220	221682	210							chrI	14605816	14606302	256		chrII	5358187	5358671	217		chrII	6852951	6853433	229		chrII	221220	221682	210
chrII	255138	255554	216							chrI	14620548	14621319	502		chrII	5373189	5373726	254		chrII	6858826	6859231	180		chrII	255138	255554	216
chrII	285594	286428	227							chrI	14625692	14626067	209		chrII	5377710	5378501	580		chrII	6888025	6892224	3308		chrII	285594	286428	227
chrII	300969	301721	230							chrI	14627951	14628464	246		chrII	5389851	5390348	253		chrII	6913243	6913710	236		chrII	300969	301721	230
chrII	323272	323792	206							chrI	14633448	14634091	560		chrII	5425918	5426415	261		chrII	6926009	6927453	653		chrII	323272	323792	206
chrII	347704	348120	193							chrI	14642495	14642913	209		chrII	5463760	5464323	254		chrII	6928347	6928825	210		chrII	347704	348120	193
chrII	354531	354853	194							chrI	14647414	14647836	189		chrII	5473885	5474362	230		chrII	6929980	6930330	211		chrII	354531	354853	194
chrII	357781	358043	99							chrI	14651448	14651985	232		chrII	5511779	5512353	286		chrII	6941437	6942418	209		chrII	357781	358043	99
chrII	401088	401673	373							chrI	14662622	14663403	375		chrII	5543239	5544489	354		chrII	6942776	6943198	165		chrII	401088	401673	373
chrII	410816	411286	234							chrI	14707936	14708358	211		chrII	5577022	5577461	181		chrII	6943510	6944085	295		chrII	410816	411286	234
chrII	484353	484810	256							chrI	14710838	14711248	193		chrII	5593438	5593989	361		chrII	6951234	6951836	286		chrII	484353	484810	256
chrII	512074	512392	129							chrI	14721418	14721820	195		chrII	5599501	5599949	219		chrII	6968211	6968762	281		chrII	512074	512392	129
chrII	601292	601730	220							chrI	14737232	14737691	235		chrII	5605336	5606039	321		chrII	6973943	6974341	249		chrII	601292	601730	220
chrII	602965	603432	235							chrI	14756246	14757015	337		chrII	5630878	5631287	223		chrII	6992692	6993446	429		chrII	602965	603432	235
chrII	622512	622866	159							chrI	14759059	14759751	450		chrII	5660787	5662572	458		chrII	6994487	6995130	300		chrII	622512	622866	159
chrII	747796	748139	184							chrI	14764879	14765228	140		chrII	5662991	5663899	543		chrII	6995593	6996217	395		chrII	747796	748139	184
chrII	759730	760286	250							chrI	14768813	14769306	229		chrII	5698286	5698732	219		chrII	7022472	7022953	248		chrII	759730	760286	250
chrII	762945	763359	200							chrI	14787692	14788116	217		chrII	5701376	5701920	232		chrII	7025157	7025722	287		chrII	762945	763359	200
chrII	764117	764596	106							chrI	14789875	14790283	204		chrII	5702611	5703140	210		chrII	7059154	7059712	279		chrII	764117	764596	106
chrII	772911	773399	368							chrI	14800165	14800554	181		chrII	5704385	5705128	201		chrII	7060116	7060572	194		chrII	772911	773399	368
chrII	848520	848915	199							chrI	14820043	14820578	276		chrII	5707482	5707874	129		chrII	7072492	7072992	221		chrII	848520	848915	199
chrII	873253	873877	360							chrI	14839581	14840101	272		chrII	5708143	5708597	216		chrII	7104908	7105378	230		chrII	873253	873877	360
chrII	891345	892021	436							chrI	14845474	14845982	259		chrII	5714768	5715222	217		chrII	7151864	7152418	252		chrII	891345	892021	436
chrII	1006413	1006868	210							chrI	14854654	14856143	1045		chrII	5723621	5724146	253		chrII	7176075	7176798	285		chrII	1006413	1006868	210
chrII	1007430	1007913	278							chrI	14867500	14868001	250		chrII	5724922	5725678	345		chrII	7182586	7183087	210		chrII	1007430	1007913	278
chrII	1012278	1012679	199							chrI	14874210	14876622	1336		chrII	5727717	5728134	174		chrII	7183810	7184322	271		chrII	1012278	1012679	199
chrII	1013259	1013741	273							chrI	14881472	14881895	188		chrII	5779701	5780478	406		chrII	7199938	7200439	238		chrII	1013259	1013741	273
chrII	1018059	1018511	214							chrI	14902674	14903256	236		chrII	5781821	5782886	380		chrII	7228469	7228885	239		chrII	1018059	1018511	214
chrII	1019047	1019572	322							chrI	14907530	14908782	767		chrII	5790317	5790689	215		chrII	7238791	7239231	202		chrII	1019047	1019572	322
chrII	1084898	1085391	233							chrI	14912816	14913950	631		chrII	5819689	5820630	219		chrII	7264639	7265038	188		chrII	1084898	1085391	233
chrII	1090791	1091135	175							chrI	14915529	14918010	2062		chrII	5836331	5836707	184		chrII	7277820	7278355	255		chrII	1090791	1091135	175
chrII	1103715	1104051	174							chrI	14918239	14919028	572		chrII	5844451	5845294	370		chrII	7279689	7280292	288		chrII	1103715	1104051	174
chrII	1134344	1135469	576							chrI	14920112	14920643	303		chrII	5859727	5860138	248		chrII	7287364	7288101	517		chrII	1134344	1135469	576
chrII	1208626	1208935	145							chrI	14920793	14923049	2001		chrII	5871436	5871862	167		chrII	7301610	7302042	222		chrII	1208626	1208935	145
chrII	1237920	1238322	178							chrI	14924321	14925048	356		chrII	5873448	5874521	391		chrII	7323053	7324391	347		chrII	1237920	1238322	178
chrII	1246811	1247346	237							chrI	14925976	14927288	284		chrII	5885951	5886327	183		chrII	7324722	7325864	549		chrII	1246811	1247346	237
chrII	1320398	1320873	231							chrI	14927952	14928520	287		chrII	5889056	5889728	279		chrII	7326761	7327442	348		chrII	1320398	1320873	231
chrII	1323225	1323643	198							chrI	14939657	14940344	349		chrII	5901442	5902026	316		chrII	7328192	7328733	304		chrII	1323225	1323643	198
chrII	1341371	1341922	299							chrI	14952234	14960013	945		chrII	5918047	5918480	282		chrII	7336977	7338119	585		chrII	1341371	1341922	299
chrII	1343892	1344190	115							chrI	14965691	14967467	513		chrII	5932016	5932826	509		chrII	7338834	7340246	337		chrII	1343892	1344190	115
chrII	1344507	1345118	329							chrI	14971441	14972066	356		chrII	5942576	5942980	203		chrII	7341468	7344987	1560		chrII	1344507	1345118	329
chrII	1360274	1360632	181							chrI	15013807	15014250	220		chrII	5948614	5950159	274		chrII	7345083	7346015	802		chrII	1360274	1360632	181
chrII	1402181	1402591	190							chrI	15022885	15023285	204		chrII	5950561	5951340	273		chrII	7352476	7353056	238		chrII	1402181	1402591	190
chrII	1455928	1458633	669							chrI	15033936	15034256	142		chrII	5951602	5952620	751		chrII	7391979	7392556	263		chrII	1455928	1458633	669
chrII	1501773	1502394	378							chrI	15052479	15052982	284		chrII	5955590	5956907	406		chrII	7393376	7394406	748		chrII	1501773	1502394	378
chrII	1519923	1520316	177							chrI	15060326	15067947	4123		chrII	5957802	5958265	247		chrII	7405222	7405667	219		chrII	1519923	1520316	177
chrII	1661301	1661725	221							chrI	15068050	15071317	1776		chrII	5958929	5960026	188		chrII	7419705	7420484	565		chrII	1661301	1661725	221
chrII	1819880	1820324	212							chrII	18583	19220	412		chrII	5960550	5961094	311		chrII	7478591	7479246	287		chrII	1819880	1820324	212
chrII	1968958	1969543	355							chrII	24427	24888	223		chrII	5962177	5963143	673		chrII	7489805	7490180	202		chrII	1968958	1969543	355
chrII	1984985	1985862	602							chrII	31492	31916	229		chrII	5964789	5966158	804		chrII	7528102	7528595	241		chrII	1984985	1985862	602
chrII	2002066	2002597	206							chrII	43624	44050	211		chrII	5966494	5967091	290		chrII	7528914	7529607	364		chrII	2002066	2002597	206
chrII	2059007	2059386	173							chrII	97898	98446	267		chrII	6026649	6027032	193		chrII	7554799	7555260	215		chrII	2059007	2059386	173
chrII	2190512	2190833	157							chrII	144055	144485	180		chrII	6028596	6028914	116		chrII	7593087	7593669	286		chrII	2190512	2190833	157
chrII	2191390	2191814	193							chrII	155761	156545	348		chrII	6040802	6041191	174		chrII	7623046	7623825	538		chrII	2191390	2191814	193
chrII	2195582	2195936	192							chrII	170361	172190	622		chrII	6047555	6048073	246		chrII	7625106	7625653	326		chrII	2195582	2195936	192
chrII	2197503	2197857	167							chrII	216540	216960	233		chrII	6061454	6061888	223		chrII	7628526	7629011	281		chrII	2197503	2197857	167
chrII	2198674	2199006	179							chrII	255132	255592	218		chrII	6120555	6120948	170		chrII	7631122	7632323	271		chrII	2198674	2199006	179
chrII	2204080	2204468	178							chrII	285570	286035	234		chrII	6121521	6122075	215		chrII	7639177	7640721	1119		chrII	2204080	2204468	178
chrII	2219896	2220315	186							chrII	300870	301498	303		chrII	6138083	6138532	228		chrII	7641901	7642847	414		chrII	2219896	2220315	186
chrII	2232421	2232816	171							chrII	319237	319902	489		chrII	6140431	6141122	232		chrII	7669397	7669749	210		chrII	2232421	2232816	171
chrII	2288883	2289228	154							chrII	323323	323798	175		chrII	6148208	6148949	362		chrII	7714602	7715219	281		chrII	2288883	2289228	154
chrII	2289362	2289834	271							chrII	325611	326445	595		chrII	6149246	6149885	351		chrII	7715703	7716546	508		chrII	2289362	2289834	271
chrII	2342021	2342365	168							chrII	347689	348174	231		chrII	6174764	6175436	317		chrII	7718921	7719372	231		chrII	2342021	2342365	168
chrII	2378488	2379016	291							chrII	385936	386389	225		chrII	6176285	6177131	413		chrII	7756740	7757251	254		chrII	2378488	2379016	291
chrII	2442140	2442605	299							chrII	401114	401684	300		chrII	6207077	6207534	291		chrII	7758368	7758765	191		chrII	2442140	2442605	299
chrII	2451069	2451421	137							chrII	410825	411329	227		chrII	6250780	6251159	181		chrII	7776193	7777759	629		chrII	2451069	2451421	137
chrII	2454795	2455200	220							chrII	506030	506381	203		chrII	6269672	6270297	317		chrII	7791344	7792059	427		chrII	2454795	2455200	220
chrII	2564887	2565318	224							chrII	580114	580614	242		chrII	6331322	6331872	249		chrII	7801805	7802301	216		chrII	2564887	2565318	224
chrII	2570225	2571068	424							chrII	603014	603444	197		chrII	6345621	6348892	2943		chrII	7806770	7807190	196		chrII	2570225	2571068	424
chrII	2648986	2649407	225							chrII	650333	650724	172		chrII	6355597	6356096	267		chrII	7808045	7808450	226		chrII	2648986	2649407	225
chrII	2734738	2735092	213							chrII	759734	760276	219		chrII	6360792	6361180	154		chrII	7808899	7809435	338		chrII	2734738	2735092	213
chrII	2748182	2748764	283							chrII	764004	764664	215		chrII	6370034	6370611	310		chrII	7836329	7837127	460		chrII	2748182	2748764	283
chrII	2752537	2752892	201							chrII	772820	773367	368		chrII	6448253	6449016	581		chrII	7838577	7839150	244		chrII	2752537	2752892	201
chrII	2787077	2787521	212							chrII	773991	774346	192		chrII	6453297	6453761	232		chrII	7860270	7860693	195		chrII	2787077	2787521	212
chrII	2794378	2794736	153							chrII	873407	873817	231		chrII	6489679	6490219	276		chrII	7873888	7874297	187		chrII	2794378	2794736	153
chrII	2800761	2801278	228							chrII	891553	891868	201		chrII	6491544	6492320	387		chrII	7884926	7885273	118		chrII	2800761	2801278	228
chrII	2802763	2803319	232							chrII	977239	977568	132		chrII	6498479	6498949	243		chrII	7887221	7887703	260		chrII	2802763	2803319	232
chrII	2804190	2804691	258							chrII	1084919	1085319	178		chrII	6535884	6536321	238		chrII	7888632	7889159	264		chrII	2804190	2804691	258
chrII	2832114	2832565	219							chrII	1134339	1135475	657		chrII	6562008	6562613	181		chrII	7891827	7892476	234		chrII	2832114	2832565	219
chrII	2889193	2889619	207							chrII	1152580	1153096	310		chrII	6563185	6563628	227		chrII	7894447	7895477	774		chrII	2889193	2889619	207
chrII	2920799	2921312	213							chrII	1188055	1188695	331		chrII	6565081	6565444	175		chrII	7920125	7920615	254		chrII	2920799	2921312	213
chrII	2962502	2963072	249							chrII	1230670	1233359	2416		chrII	6588770	6589622	298		chrII	7921040	7921514	243		chrII	2962502	2963072	249
chrII	2969594	2969917	191							chrII	1246807	1247463	299		chrII	6683554	6684039	253		chrII	7945056	7945527	229		chrII	2969594	2969917	191
chrII	2970302	2970836	282							chrII	1248516	1249155	250		chrII	6689057	6689485	190		chrII	7963518	7964123	250		chrII	2970302	2970836	282
chrII	2971745	2972290	223							chrII	1310037	1310488	259		chrII	6689942	6690386	192		chrII	7968216	7968641	242		chrII	2971745	2972290	223
chrII	2973490	2974595	620							chrII	1320379	1320868	260		chrII	6705706	6706239	249		chrII	7969235	7969776	348		chrII	2973490	2974595	620
chrII	2975555	2977517	1272							chrII	1323267	1323667	139		chrII	6707394	6708233	257		chrII	7977452	7978157	187		chrII	2975555	2977517	1272
chrII	2987773	2988310	246							chrII	1402165	1402590	216		chrII	6708781	6709973	385		chrII	7979135	7979564	228		chrII	2987773	2988310	246
chrII	2994543	2995465	241							chrII	1453909	1454303	208		chrII	6727637	6728028	162		chrII	7980971	7982145	810		chrII	2994543	2995465	241
chrII	3076915	3077354	216							chrII	1456010	1456825	579		chrII	6729251	6729633	205		chrII	7983946	7984413	116		chrII	3076915	3077354	216
chrII	3159600	3168471	7457							chrII	1457297	1457614	131		chrII	6734629	6735012	230		chrII	7984861	7985472	393		chrII	3159600	3168471	7457
chrII	3209208	3209649	232							chrII	1519800	1520334	250		chrII	6776344	6777057	388		chrII	7985613	7986484	418		chrII	3209208	3209649	232
chrII	3265605	3266072	239							chrII	1661334	1661701	189		chrII	6782599	6783209	205		chrII	7990096	7990524	215		chrII	3265605	3266072	239
chrII	3270615	3271013	212							chrII	1985291	1985750	287		chrII	6808276	6809004	400		chrII	8012029	8012914	325		chrII	3270615	3271013	212
chrII	3428156	3428599	194							chrII	2002126	2002529	169		chrII	6812276	6812950	372		chrII	8015287	8017339	1677		chrII	3428156	3428599	194
chrII	3439182	3439862	224							chrII	2059011	2059396	178		chrII	6819452	6819855	163		chrII	8028080	8028956	388		chrII	3439182	3439862	224
chrII	3502608	3503048	224							chrII	2197510	2197833	160		chrII	6820235	6821581	1075		chrII	8039379	8039760	182		chrII	3502608	3503048	224
chrII	3518939	3519456	279							chrII	2204023	2204557	253		chrII	6821739	6822882	770		chrII	8062222	8062639	175		chrII	3518939	3519456	279
chrII	3521375	3521839	219							chrII	2219877	2220252	215		chrII	6823112	6824910	931		chrII	8070918	8072202	1003		chrII	3521375	3521839	219
chrII	3523506	3523924	206							chrII	2232419	2232809	186		chrII	6825452	6826233	504		chrII	8075259	8075696	200		chrII	3523506	3523924	206
chrII	3547235	3547696	223							chrII	2342009	2342387	188		chrII	6826606	6829627	920		chrII	8086721	8087157	226		chrII	3547235	3547696	223
chrII	3553432	3553830	231							chrII	2451047	2451472	169		chrII	6829985	6830452	340		chrII	8105003	8105337	135		chrII	3553432	3553830	231
chrII	3567583	3567955	222							chrII	2479032	2479478	215		chrII	6831455	6833446	1708		chrII	8124826	8125229	205		chrII	3567583	3567955	222
chrII	3808113	3808506	194							chrII	2564880	2565353	227		chrII	6833649	6834395	469		chrII	8126011	8126960	261		chrII	3808113	3808506	194
chrII	3810576	3810941	188							chrII	2570336	2570873	385		chrII	6835430	6837690	262		chrII	8128102	8130034	308		chrII	3810576	3810941	188
chrII	3816232	3816611	238							chrII	2638075	2638502	190		chrII	6838070	6839967	452		chrII	8130543	8132066	950		chrII	3816232	3816611	238
chrII	3896841	3897455	280							chrII	2649003	2649430	241		chrII	6840768	6841554	511		chrII	8137155	8137698	395		chrII	3896841	3897455	280
chrII	3897689	3898193	281							chrII	2735674	2736014	148		chrII	6842009	6845425	802		chrII	8184913	8185386	227		chrII	3897689	3898193	281
chrII	3928388	3928690	125							chrII	2748243	2748652	204		chrII	6847757	6848620	439		chrII	8222571	8222977	245		chrII	3928388	3928690	125
chrII	3930601	3931259	427							chrII	2752534	2752993	238		chrII	6849133	6849753	325		chrII	8224601	8225066	242		chrII	3930601	3931259	427
chrII	3948518	3948901	206							chrII	2787106	2787584	215		chrII	6852951	6853469	237		chrII	8225946	8226341	160		chrII	3948518	3948901	206
chrII	3951338	3951813	246							chrII	2794288	2794863	176		chrII	6858714	6859477	360		chrII	8259613	8260041	218		chrII	3951338	3951813	246
chrII	3952840	3953579	416							chrII	2804243	2804634	186		chrII	6888049	6892235	3341		chrII	8263432	8263943	282		chrII	3952840	3953579	416
chrII	3954794	3955447	261							chrII	2832056	2832531	297		chrII	6913216	6913690	260		chrII	8264534	8264915	154		chrII	3954794	3955447	261
chrII	3956760	3957147	164							chrII	2834099	2834561	192		chrII	6915844	6916137	187		chrII	8328815	8329335	270		chrII	3956760	3957147	164
chrII	3958170	3959526	705							chrII	2844514	2845337	302		chrII	6926090	6927406	520		chrII	8353307	8353733	187		chrII	3958170	3959526	705
chrII	3960263	3960789	277							chrII	2860025	2860811	353		chrII	6928284	6928854	270		chrII	8382831	8383256	205		chrII	3960263	3960789	277
chrII	3961268	3961658	195							chrII	2861427	2861851	221		chrII	6943520	6944306	327		chrII	8440104	8441279	887		chrII	3961268	3961658	195
chrII	4044358	4044764	188							chrII	2889111	2889652	286		chrII	6951197	6951801	314		chrII	8442033	8442550	318		chrII	4044358	4044764	188
chrII	4047847	4048294	212							chrII	2920845	2921307	188		chrII	6957471	6957850	202		chrII	8450663	8451123	227		chrII	4047847	4048294	212
chrII	4049682	4050063	198							chrII	2962381	2963089	367		chrII	6968248	6968761	259		chrII	8451367	8451871	213		chrII	4049682	4050063	198
chrII	4089096	4089677	263							chrII	2969430	2970840	1162		chrII	6973899	6974367	253		chrII	8480716	8481598	480		chrII	4089096	4089677	263
chrII	4106846	4107180	178							chrII	2973885	2974270	187		chrII	6992752	6993471	368		chrII	8483119	8484226	792		chrII	4106846	4107180	178
chrII	4133340	4133753	231							chrII	2976327	2977968	464		chrII	6994566	6995140	311		chrII	8485554	8485974	172		chrII	4133340	4133753	231
chrII	4134685	4135155	214							chrII	2987551	2988423	522		chrII	6995566	6996299	454		chrII	8504280	8504761	194		chrII	4134685	4135155	214
chrII	4277009	4277278	129							chrII	2991581	2992842	241		chrII	7022343	7022971	341		chrII	8546948	8547338	181		chrII	4277009	4277278	129
chrII	4291863	4292202	166							chrII	2994603	2995258	236		chrII	7025095	7025814	334		chrII	8559156	8559505	190		chrII	4291863	4292202	166
chrII	4299211	4299644	218							chrII	3014446	3015047	223		chrII	7059122	7059734	317		chrII	8561128	8561624	254		chrII	4299211	4299644	218
chrII	4308189	4309340	725							chrII	3062101	3062610	291		chrII	7072555	7072992	262		chrII	8569229	8569726	248		chrII	4308189	4309340	725
chrII	4376555	4377029	240							chrII	3076830	3077363	294		chrII	7104914	7105391	225		chrII	8587536	8588628	450		chrII	4376555	4377029	240
chrII	4455992	4456587	328							chrII	3165165	3167563	1893		chrII	7110960	7111408	266		chrII	8589125	8589636	238		chrII	4455992	4456587	328
chrII	4485507	4485942	239							chrII	3209183	3209649	241		chrII	7111559	7112030	226		chrII	8602254	8602674	201		chrII	4485507	4485942	239
chrII	4494509	4494968	215							chrII	3265581	3266039	237		chrII	7151896	7152405	250		chrII	8643575	8643945	144		chrII	4494509	4494968	215
chrII	4504973	4505469	240							chrII	3428124	3428504	150		chrII	7176092	7176886	275		chrII	8650243	8651062	570		chrII	4504973	4505469	240
chrII	4506453	4507092	258							chrII	3439119	3439938	272		chrII	7182507	7183130	338		chrII	8661495	8661910	224		chrII	4506453	4507092	258
chrII	4518300	4518746	198							chrII	3482192	3482651	228		chrII	7183794	7184363	261		chrII	8683837	8684272	218		chrII	4518300	4518746	198
chrII	4519947	4520602	499							chrII	3502625	3503068	221		chrII	7199895	7200518	270		chrII	8706962	8707392	211		chrII	4519947	4520602	499
chrII	4554975	4555624	306							chrII	3518806	3519544	441		chrII	7228507	7228889	228		chrII	8717430	8718204	307		chrII	4554975	4555624	306
chrII	4573190	4573524	185							chrII	3521346	3521840	215		chrII	7238180	7238659	211		chrII	8738854	8739270	246		chrII	4573190	4573524	185
chrII	4574164	4574967	236							chrII	3523569	3523908	144		chrII	7238826	7239230	163		chrII	8740153	8740882	352		chrII	4574164	4574967	236
chrII	4576163	4576541	226							chrII	3547284	3547743	237		chrII	7277842	7278355	248		chrII	8741057	8748055	1149		chrII	4576163	4576541	226
chrII	4602928	4603432	293							chrII	3553375	3553847	258		chrII	7279729	7280258	276		chrII	8764381	8764721	146		chrII	4602928	4603432	293
chrII	4606720	4607065	137							chrII	3567546	3568019	231		chrII	7287219	7288097	631		chrII	8765036	8765606	246		chrII	4606720	4607065	137
chrII	4641206	4642246	718							chrII	3682799	3683132	181		chrII	7301620	7302031	224		chrII	8765788	8766463	235		chrII	4641206	4642246	718
chrII	4642457	4643762	640							chrII	3808081	3808555	235		chrII	7319403	7319831	192		chrII	8784296	8784998	370		chrII	4642457	4643762	640
chrII	4643880	4644957	486							chrII	3896858	3897445	283		chrII	7323130	7324478	290		chrII	8785724	8786367	278		chrII	4643880	4644957	486
chrII	4672599	4673076	242							chrII	3911281	3911712	192		chrII	7324918	7325768	402		chrII	8787239	8787819	303		chrII	4672599	4673076	242
chrII	4698272	4698621	172							chrII	3930660	3931350	352		chrII	7326198	7327481	896		chrII	8796261	8796845	336		chrII	4698272	4698621	172
chrII	4701282	4702013	485							chrII	3934670	3935159	233		chrII	7327993	7329203	632		chrII	8799694	8800023	167		chrII	4701282	4702013	485
chrII	4739926	4740417	307							chrII	3948514	3949077	265		chrII	7336877	7338173	710		chrII	8812837	8814410	965		chrII	4739926	4740417	307
chrII	4741433	4741941	216							chrII	3951224	3951850	255		chrII	7338872	7339430	287		chrII	8818212	8818683	249		chrII	4741433	4741941	216
chrII	4745176	4745708	299							chrII	3958540	3959381	399		chrII	7341492	7343545	1561		chrII	8819103	8821596	483		chrII	4745176	4745708	299
chrII	4748219	4748972	349							chrII	3972029	3973087	266		chrII	7356797	7357388	97		chrII	8822039	8823503	817		chrII	4748219	4748972	349
chrII	4751595	4752398	598							chrII	3974637	3975254	459		chrII	7380431	7380814	217		chrII	8844673	8845129	224		chrII	4751595	4752398	598
chrII	4759597	4760229	404							chrII	4044288	4044824	270		chrII	7391966	7392536	317		chrII	8852048	8852652	277		chrII	4759597	4760229	404
chrII	4761047	4761550	168							chrII	4047844	4048331	226		chrII	7393765	7394367	336		chrII	8853689	8854365	451		chrII	4761047	4761550	168
chrII	4791252	4791713	215							chrII	4049664	4050115	224		chrII	7405256	7405646	169		chrII	8912264	8912902	456		chrII	4791252	4791713	215
chrII	4805843	4806624	565							chrII	4051297	4051686	185		chrII	7478596	7479245	244		chrII	8917651	8918066	252		chrII	4805843	4806624	565
chrII	4821770	4822256	253							chrII	4053931	4054364	233		chrII	7489805	7490273	205		chrII	8931205	8932208	371		chrII	4821770	4822256	253
chrII	4828101	4828478	146							chrII	4089125	4089597	265		chrII	7528126	7528585	216		chrII	8933652	8934303	376		chrII	4828101	4828478	146
chrII	4851594	4852035	224							chrII	4151709	4152083	213		chrII	7528944	7529584	300		chrII	8955928	8956332	167		chrII	4851594	4852035	224
chrII	4854766	4856542	1499							chrII	4299134	4299731	315		chrII	7593013	7593732	342		chrII	8956881	8957393	117		chrII	4854766	4856542	1499
chrII	4881608	4882151	301							chrII	4308393	4309210	737		chrII	7594201	7594523	164		chrII	8958874	8960099	434		chrII	4881608	4882151	301
chrII	4888739	4889238	249							chrII	4372211	4372776	165		chrII	7621366	7621913	283		chrII	8962127	8962511	146		chrII	4888739	4889238	249
chrII	4891368	4891752	155							chrII	4376665	4376976	117		chrII	7622948	7623810	694		chrII	8969174	8969671	223		chrII	4891368	4891752	155
chrII	4902023	4902394	209							chrII	4424804	4425230	208		chrII	7624872	7625694	565		chrII	9008072	9008629	184		chrII	4902023	4902394	209
chrII	4904130	4904658	245							chrII	4456021	4456508	174		chrII	7628449	7628977	354		chrII	9010195	9011142	270		chrII	4904130	4904658	245
chrII	4907143	4907692	204							chrII	4490681	4491169	217		chrII	7631095	7632163	264		chrII	9011666	9012187	251		chrII	4907143	4907692	204
chrII	4908105	4908563	247							chrII	4506492	4507058	182		chrII	7639354	7641152	952		chrII	9013327	9013754	176		chrII	4908105	4908563	247
chrII	4925370	4925765	195							chrII	4513113	4513566	277		chrII	7641925	7642865	385		chrII	9014835	9015264	234		chrII	4925370	4925765	195
chrII	4941480	4942023	300							chrII	4555080	4555504	213		chrII	7669380	7669789	222		chrII	9028059	9028574	237		chrII	4941480	4942023	300
chrII	4993712	4994156	238							chrII	4564534	4565599	911		chrII	7708510	7708901	199		chrII	9031755	9032170	145		chrII	4993712	4994156	238
chrII	4999141	4999514	169							chrII	4571083	4571564	241		chrII	7714648	7715225	323		chrII	9054526	9054993	225		chrII	4999141	4999514	169
chrII	5016968	5017760	429							chrII	4590342	4591597	528		chrII	7715608	7716536	661		chrII	9057157	9057657	253		chrII	5016968	5017760	429
chrII	5019323	5019901	207							chrII	4602890	4603514	345		chrII	7718903	7719382	271		chrII	9060000	9062602	452		chrII	5019323	5019901	207
chrII	5020709	5021063	125							chrII	4606754	4607290	195		chrII	7756716	7757315	315		chrII	9064367	9064783	227		chrII	5020709	5021063	125
chrII	5032582	5033031	238							chrII	4642885	4643577	305		chrII	7758285	7758698	247		chrII	9098918	9099373	225		chrII	5032582	5033031	238
chrII	5042467	5042762	146							chrII	4672610	4673118	229		chrII	7776290	7777653	541		chrII	9107069	9107589	117		chrII	5042467	5042762	146
chrII	5046232	5046723	206							chrII	4693195	4693621	211		chrII	7791271	7792219	237		chrII	9111200	9111528	146		chrII	5046232	5046723	206
chrII	5049219	5049721	264							chrII	4698227	4698648	227		chrII	7799648	7800052	129		chrII	9112594	9114035	398		chrII	5049219	5049721	264
chrII	5055151	5055569	224							chrII	4701245	4702028	434		chrII	7801846	7802302	234		chrII	9115561	9115925	195		chrII	5055151	5055569	224
chrII	5057308	5057702	198							chrII	4706354	4706722	186		chrII	7806770	7807179	246		chrII	9117525	9118333	377		chrII	5057308	5057702	198
chrII	5061749	5062185	205							chrII	4739907	4740419	270		chrII	7808081	7808494	209		chrII	9120362	9121332	648		chrII	5061749	5062185	205
chrII	5081187	5081551	219							chrII	4790698	4791816	791		chrII	7808881	7809574	332		chrII	9128015	9128565	302		chrII	5081187	5081551	219
chrII	5092276	5092825	226							chrII	4827981	4828536	288		chrII	7836339	7837175	432		chrII	9160081	9161553	298		chrII	5092276	5092825	226
chrII	5181354	5182053	349							chrII	4851522	4852061	288		chrII	7838556	7839077	278		chrII	9176973	9177379	190		chrII	5181354	5182053	349
chrII	5182323	5182899	325							chrII	4856022	4856556	207		chrII	7857416	7857828	166		chrII	9242780	9243158	204		chrII	5182323	5182899	325
chrII	5185968	5186360	178							chrII	4857007	4857580	278		chrII	7860250	7860704	244		chrII	9261901	9262505	324		chrII	5185968	5186360	178
chrII	5200942	5201570	209							chrII	4858897	4859723	374		chrII	7884762	7885324	366		chrII	9263733	9264129	197		chrII	5200942	5201570	209
chrII	5201857	5202367	242							chrII	4865765	4866426	443		chrII	7887199	7887721	211		chrII	9264565	9265407	417		chrII	5201857	5202367	242
chrII	5271855	5272336	233							chrII	4881680	4882312	199		chrII	7888498	7889561	399		chrII	9273789	9274440	347		chrII	5271855	5272336	233
chrII	5276670	5277389	285							chrII	4888602	4889377	378		chrII	7891742	7892540	287		chrII	9281508	9282083	283		chrII	5276670	5277389	285
chrII	5281147	5281587	226							chrII	4891268	4891912	248		chrII	7894499	7895518	733		chrII	9282650	9283219	273		chrII	5281147	5281587	226
chrII	5282199	5282572	197							chrII	4901936	4902457	237		chrII	7920974	7921544	297		chrII	9283524	9285907	651		chrII	5282199	5282572	197
chrII	5292130	5292571	199							chrII	4904108	4904819	301		chrII	7945042	7945546	249		chrII	9306757	9307314	327		chrII	5292130	5292571	199
chrII	5301574	5302355	427							chrII	4911730	4912250	319		chrII	7963475	7963998	202		chrII	9322874	9323324	231		chrII	5301574	5302355	427
chrII	5303773	5304197	175							chrII	4928285	4928850	268		chrII	7968278	7968676	274		chrII	9343845	9344403	268		chrII	5303773	5304197	175
chrII	5305055	5305463	201							chrII	4935480	4935913	218		chrII	7970015	7970364	166		chrII	9356620	9357112	257		chrII	5305055	5305463	201
chrII	5307217	5307644	205							chrII	4942293	4942778	262		chrII	7974250	7974730	299		chrII	9416553	9416997	216		chrII	5307217	5307644	205
chrII	5308963	5309348	183							chrII	4955326	4955798	218		chrII	7979118	7979803	257		chrII	9485064	9485587	266		chrII	5308963	5309348	183
chrII	5320025	5320849	482							chrII	4993764	4994206	229		chrII	7981086	7982141	287		chrII	9487349	9488006	361		chrII	5320025	5320849	482
chrII	5321561	5321989	224							chrII	4999090	4999555	237		chrII	7983671	7984585	328		chrII	9488693	9489163	275		chrII	5321561	5321989	224
chrII	5323678	5324240	259							chrII	5017038	5017748	312		chrII	7984682	7986188	220		chrII	9490497	9490878	259		chrII	5323678	5324240	259
chrII	5324603	5325070	233							chrII	5032452	5033189	311		chrII	7986265	7987347	743		chrII	9493170	9493869	352		chrII	5324603	5325070	233
chrII	5326029	5326742	399							chrII	5039896	5040377	236		chrII	7989974	7990601	355		chrII	9497254	9497632	186		chrII	5326029	5326742	399
chrII	5328643	5329510	442							chrII	5055110	5055611	250		chrII	7991277	7991705	190		chrII	9498459	9499026	204		chrII	5328643	5329510	442
chrII	5329716	5330829	609							chrII	5057216	5057811	276		chrII	8011968	8012869	244		chrII	9500808	9501384	287		chrII	5329716	5330829	609
chrII	5334683	5337997	2387							chrII	5061585	5062262	385		chrII	8015273	8017731	1637		chrII	9591011	9591435	208		chrII	5334683	5337997	2387
chrII	5338243	5338739	262							chrII	5081181	5081606	193		chrII	8028024	8028907	432		chrII	9599882	9600402	235		chrII	5338243	5338739	262
chrII	5340604	5341238	416							chrII	5092318	5092744	213		chrII	8039314	8039793	243		chrII	9600921	9602075	282		chrII	5340604	5341238	416
chrII	5346319	5346878	265							chrII	5104980	5105453	236		chrII	8062179	8062692	199		chrII	9602451	9602825	184		chrII	5346319	5346878	265
chrII	5347133	5347545	207							chrII	5181345	5182096	348		chrII	8070839	8072279	1057		chrII	9603190	9603885	403		chrII	5347133	5347545	207
chrII	5350207	5350746	262							chrII	5200883	5201644	256		chrII	8075254	8075716	184		chrII	9603989	9604469	242		chrII	5350207	5350746	262
chrII	5358171	5358655	240							chrII	5210646	5211176	348		chrII	8086711	8087229	240		chrII	9605819	9607334	271		chrII	5358171	5358655	240
chrII	5373211	5373727	230							chrII	5237587	5238121	271		chrII	8107006	8107388	148		chrII	9619154	9621521	446		chrII	5373211	5373727	230
chrII	5377765	5378654	519							chrII	5276641	5277382	306		chrII	8124804	8125335	269		chrII	9644747	9645485	386		chrII	5377765	5378654	519
chrII	5379605	5379999	156							chrII	5291831	5292671	479		chrII	8125997	8127109	284		chrII	9645782	9646476	406		chrII	5379605	5379999	156
chrII	5389886	5390312	209							chrII	5293211	5293753	275		chrII	8128072	8130100	364		chrII	9655699	9656571	652		chrII	5389886	5390312	209
chrII	5425989	5426459	237							chrII	5299480	5299959	226		chrII	8130640	8132064	828		chrII	9668872	9669326	223		chrII	5425989	5426459	237
chrII	5473932	5474299	221							chrII	5301774	5302372	217		chrII	8137331	8137780	238		chrII	9681995	9682303	157		chrII	5473932	5474299	221
chrII	5511664	5512407	433							chrII	5308940	5309371	246		chrII	8162159	8162583	245		chrII	9686556	9687131	312		chrII	5511664	5512407	433
chrII	5543237	5544475	344							chrII	5319074	5321913	1187		chrII	8184869	8185409	279		chrII	9690044	9690577	290		chrII	5543237	5544475	344
chrII	5557140	5557484	163							chrII	5322197	5322554	152		chrII	8216326	8216755	200		chrII	9695920	9696313	190		chrII	5557140	5557484	163
chrII	5572072	5572510	186							chrII	5323505	5325022	521		chrII	8222551	8223041	230		chrII	9716562	9717015	227		chrII	5572072	5572510	186
chrII	5593541	5594615	214							chrII	5325984	5326783	437		chrII	8263468	8263925	251		chrII	9718575	9719058	246		chrII	5593541	5594615	214
chrII	5599545	5599945	171							chrII	5329985	5330527	320		chrII	8311382	8312322	192		chrII	9727140	9727579	231		chrII	5599545	5599945	171
chrII	5605290	5606033	311							chrII	5335499	5336370	586		chrII	8328817	8329324	277		chrII	9728429	9728852	201		chrII	5605290	5606033	311
chrII	5622388	5622871	242							chrII	5336786	5338709	227		chrII	8353297	8353679	153		chrII	9731722	9732182	300		chrII	5622388	5622871	242
chrII	5630883	5631414	210							chrII	5340052	5344100	1015		chrII	8382826	8383310	236		chrII	9745969	9746406	227		chrII	5630883	5631414	210
chrII	5649410	5649803	202							chrII	5346208	5347020	417		chrII	8440099	8440564	214		chrII	9752205	9752619	217		chrII	5649410	5649803	202
chrII	5660784	5662265	335							chrII	5347101	5347590	240		chrII	8440698	8441203	275		chrII	9752958	9753343	187		chrII	5660784	5662265	335
chrII	5663102	5663710	349							chrII	5350178	5350889	295		chrII	8441958	8442658	393		chrII	9755340	9755732	240		chrII	5663102	5663710	349
chrII	5698181	5698644	232							chrII	5353258	5354176	598		chrII	8450673	8451076	258		chrII	9757521	9757971	220		chrII	5698181	5698644	232
chrII	5701413	5701860	198							chrII	5354344	5355210	357		chrII	8451406	8451911	244		chrII	9774194	9775047	654		chrII	5701413	5701860	198
chrII	5702584	5703147	159							chrII	5356605	5357160	335		chrII	8457473	8457788	102		chrII	9786162	9786506	218		chrII	5702584	5703147	159
chrII	5704477	5705148	192							chrII	5358083	5358654	296		chrII	8480445	8481825	751		chrII	9787245	9788048	317		chrII	5704477	5705148	192
chrII	5708121	5708574	173							chrII	5373176	5373916	248		chrII	8483097	8485017	837		chrII	9791128	9791571	227		chrII	5708121	5708574	173
chrII	5714815	5715169	186							chrII	5379530	5380053	272		chrII	8485468	8486061	309		chrII	9891170	9892077	688		chrII	5714815	5715169	186
chrII	5723649	5724189	196							chrII	5389868	5390352	258		chrII	8504268	8504894	227		chrII	9892354	9892787	192		chrII	5723649	5724189	196
chrII	5724883	5725682	446							chrII	5398914	5399582	439		chrII	8516708	8517165	206		chrII	9937474	9937984	298		chrII	5724883	5725682	446
chrII	5727692	5728095	180							chrII	5429706	5430044	169		chrII	8559163	8559513	154		chrII	9940342	9940814	245		chrII	5727692	5728095	180
chrII	5772809	5773137	157							chrII	5473762	5474432	356		chrII	8561132	8561623	233		chrII	9968287	9968669	192		chrII	5772809	5773137	157
chrII	5779679	5780444	398							chrII	5501245	5501635	199		chrII	8569235	8569761	243		chrII	9974141	9974574	202		chrII	5779679	5780444	398
chrII	5781740	5782887	963							chrII	5511755	5512352	157		chrII	8585050	8585584	286		chrII	9974808	9975353	291		chrII	5781740	5782887	963
chrII	5819714	5820674	735							chrII	5543293	5544441	250		chrII	8587507	8588723	352		chrII	9984645	9985564	304		chrII	5819714	5820674	735
chrII	5836318	5836727	211							chrII	5577012	5577516	224		chrII	8589026	8589658	325		chrII	9986605	9987400	238		chrII	5836318	5836727	211
chrII	5841162	5841560	175							chrII	5593576	5594590	152		chrII	8602263	8602677	224		chrII	9992351	9992773	254		chrII	5841162	5841560	175
chrII	5844499	5845224	305							chrII	5599472	5600079	231		chrII	8650214	8650994	602		chrII	10019575	10020104	217		chrII	5844499	5845224	305
chrII	5860560	5861011	319							chrII	5605429	5605947	173		chrII	8661553	8661888	138		chrII	10028833	10029464	345		chrII	5860560	5861011	319
chrII	5863164	5863534	216							chrII	5622403	5622872	244		chrII	8683794	8684302	268		chrII	10033324	10033971	280		chrII	5863164	5863534	216
chrII	5871470	5871911	190							chrII	5630864	5631329	226		chrII	8717497	8717963	215		chrII	10034577	10035096	281		chrII	5871470	5871911	190
chrII	5873521	5874556	310							chrII	5633394	5633836	214		chrII	8730244	8730678	223		chrII	10169169	10169781	288		chrII	5873521	5874556	310
chrII	5885910	5886340	247							chrII	5649391	5649818	215		chrII	8740158	8740875	312		chrII	10174198	10174720	279		chrII	5885910	5886340	247
chrII	5889078	5890223	335							chrII	5660847	5662259	377		chrII	8741040	8748081	1098		chrII	10197048	10197413	180		chrII	5889078	5890223	335
chrII	5895598	5896010	186							chrII	5663110	5663707	347		chrII	8765077	8765599	253		chrII	10248272	10248753	256		chrII	5895598	5896010	186
chrII	5896531	5896836	168							chrII	5688926	5689355	210		chrII	8769312	8769875	245		chrII	10284671	10285115	251		chrII	5896531	5896836	168
chrII	5901567	5902006	205							chrII	5691370	5691776	203		chrII	8784262	8785019	379		chrII	10294169	10294580	230		chrII	5901567	5902006	205
chrII	5912078	5912512	235							chrII	5698215	5699140	222		chrII	8787180	8787857	352		chrII	10300170	10300702	330		chrII	5912078	5912512	235
chrII	5918085	5918488	236							chrII	5701366	5701992	242		chrII	8796293	8796840	275		chrII	10300851	10301319	240		chrII	5918085	5918488	236
chrII	5930117	5930563	181							chrII	5714778	5715202	207		chrII	8813103	8814508	715		chrII	10373407	10373876	202		chrII	5930117	5930563	181
chrII	5931968	5932734	558							chrII	5715694	5716184	182		chrII	8818232	8818662	215		chrII	10382156	10382656	254		chrII	5931968	5932734	558
chrII	5942580	5943043	224							chrII	5723659	5724128	202		chrII	8819164	8821572	1422		chrII	10387932	10389512	1296		chrII	5942580	5943043	224
chrII	5944755	5945314	366							chrII	5724652	5725670	636		chrII	8822098	8823516	749		chrII	10389654	10390857	270		chrII	5944755	5945314	366
chrII	5947757	5948126	201							chrII	5727682	5728109	230		chrII	8830947	8831340	188		chrII	10395323	10395733	182		chrII	5947757	5948126	201
chrII	5948604	5949218	310							chrII	5772716	5773213	249		chrII	8844649	8845144	221		chrII	10444956	10446689	1463		chrII	5948604	5949218	310
chrII	5949466	5950188	207							chrII	5779787	5780403	255		chrII	8845938	8846336	134		chrII	10446857	10448277	647		chrII	5949466	5950188	207
chrII	5950586	5951447	113							chrII	5781860	5782813	399		chrII	8912566	8912877	171		chrII	10448433	10449250	585		chrII	5950586	5951447	113
chrII	5951527	5952615	919							chrII	5819626	5820684	261		chrII	8917448	8918101	469		chrII	10450010	10450813	465		chrII	5951527	5952615	919
chrII	5955503	5956499	471							chrII	5836277	5836734	236		chrII	8927196	8927635	222		chrII	10501390	10501976	308		chrII	5955503	5956499	471
chrII	5957841	5958158	210							chrII	5839229	5839629	165		chrII	8931010	8932229	566		chrII	10502425	10503145	353		chrII	5957841	5958158	210
chrII	5958878	5959294	220							chrII	5844443	5845305	366		chrII	8933821	8934287	209		chrII	10537898	10538316	176		chrII	5958878	5959294	220
chrII	5960564	5961133	203							chrII	5860498	5861014	312		chrII	8955647	8956401	518		chrII	10541782	10547552	334		chrII	5960564	5961133	203
chrII	5962239	5963188	228							chrII	5865369	5866269	663		chrII	8956845	8957576	211		chrII	10547652	10552673	4411		chrII	5962239	5963188	228
chrII	5964777	5966277	802							chrII	5866610	5867332	492		chrII	8958467	8960248	759		chrII	10555125	10557895	2237		chrII	5964777	5966277	802
chrII	5966462	5967138	303							chrII	5871472	5871958	149		chrII	8961944	8962626	415		chrII	10558111	10560096	895		chrII	5966462	5967138	303
chrII	6026645	6026989	166							chrII	5873481	5874572	390		chrII	8964746	8965211	236		chrII	10563230	10563767	276		chrII	6026645	6026989	166
chrII	6028645	6028992	125							chrII	5892450	5893579	397		chrII	8969133	8969655	276		chrII	10658611	10659105	235		chrII	6028645	6028992	125
chrII	6045982	6046338	201							chrII	5895587	5896281	332		chrII	9008014	9008555	202		chrII	10705961	10706361	160		chrII	6045982	6046338	201
chrII	6047605	6048025	202							chrII	5900155	5900974	550		chrII	9010167	9011180	618		chrII	10743581	10744125	286		chrII	6047605	6048025	202
chrII	6061515	6061850	148							chrII	5901468	5902032	276		chrII	9014823	9015266	202		chrII	10744566	10745251	419		chrII	6061515	6061850	148
chrII	6097449	6097847	190							chrII	5907402	5907917	280		chrII	9054518	9054984	250		chrII	10753628	10753976	208		chrII	6097449	6097847	190
chrII	6114026	6114429	288							chrII	5912058	5912495	234		chrII	9057120	9057735	281		chrII	10758927	10759348	225		chrII	6114026	6114429	288
chrII	6118304	6118715	197							chrII	5917898	5918706	462		chrII	9060012	9062632	1885		chrII	10769195	10769578	172		chrII	6118304	6118715	197
chrII	6120526	6120986	249							chrII	5921385	5922121	406		chrII	9098909	9099350	200		chrII	10798392	10799255	232		chrII	6120526	6120986	249
chrII	6121673	6122028	204							chrII	5924444	5925608	857		chrII	9107046	9107601	275		chrII	10800106	10800540	197		chrII	6121673	6122028	204
chrII	6138025	6138558	327							chrII	5929993	5930608	215		chrII	9108354	9108829	277		chrII	10806042	10806629	435		chrII	6138025	6138558	327
chrII	6139459	6139831	179							chrII	5930981	5931976	312		chrII	9109105	9109601	225		chrII	10830380	10830821	165		chrII	6139459	6139831	179
chrII	6148169	6148884	356							chrII	5932312	5932738	193		chrII	9112672	9114059	296		chrII	10835377	10836180	523		chrII	6148169	6148884	356
chrII	6149354	6149872	165							chrII	5940112	5943162	2718		chrII	9115589	9115963	230		chrII	10839996	10840460	235		chrII	6149354	6149872	165
chrII	6170242	6170594	171							chrII	5944252	5945509	783		chrII	9117510	9118280	374		chrII	10850878	10851517	374		chrII	6170242	6170594	171
chrII	6174827	6175440	265							chrII	5948560	5949114	358		chrII	9120711	9121375	287		chrII	10861696	10863106	590		chrII	6174827	6175440	265
chrII	6176298	6177088	456							chrII	5965274	5966026	335		chrII	9127997	9128517	283		chrII	10867124	10867578	261		chrII	6176298	6177088	456
chrII	6181386	6181787	186							chrII	5966451	5967116	306		chrII	9160103	9160665	236		chrII	10868666	10869133	242		chrII	6181386	6181787	186
chrII	6250750	6251157	192							chrII	6045926	6046340	237		chrII	9160938	9161448	240		chrII	10872460	10872904	219		chrII	6250750	6251157	192
chrII	6269675	6270210	283							chrII	6047596	6048074	217		chrII	9176974	9177461	264		chrII	10924642	10925004	174		chrII	6269675	6270210	283
chrII	6290231	6290630	219							chrII	6055914	6056279	173		chrII	9207312	9207776	237		chrII	10949976	10950603	251		chrII	6290231	6290630	219
chrII	6320958	6321326	199							chrII	6061446	6061886	228		chrII	9208013	9208480	285		chrII	11020629	11021099	224		chrII	6320958	6321326	199
chrII	6327362	6327738	176							chrII	6097389	6097843	224		chrII	9211759	9212131	210		chrII	11021914	11022377	223		chrII	6327362	6327738	176
chrII	6331322	6331853	256							chrII	6113965	6114404	226		chrII	9240033	9240409	215		chrII	11041764	11042243	239		chrII	6331322	6331853	256
chrII	6335365	6335694	198							chrII	6122581	6123068	211		chrII	9242706	9243204	270		chrII	11042701	11043508	441		chrII	6335365	6335694	198
chrII	6342475	6342779	122							chrII	6157451	6159324	520		chrII	9261407	9262562	838		chrII	11049812	11050213	211		chrII	6342475	6342779	122
chrII	6343827	6344301	192							chrII	6174906	6175433	326		chrII	9263708	9264113	256		chrII	11091494	11091916	217		chrII	6343827	6344301	192
chrII	6345556	6347197	349							chrII	6196794	6197314	253		chrII	9264625	9265291	396		chrII	11097235	11097723	249		chrII	6345556	6347197	349
chrII	6347634	6349092	945							chrII	6248476	6248878	165		chrII	9273833	9274522	297		chrII	11102965	11103412	196		chrII	6347634	6349092	945
chrII	6355656	6356175	214							chrII	6250712	6251206	233		chrII	9281437	9282168	292		chrII	11126303	11126791	235		chrII	6355656	6356175	214
chrII	6360805	6361166	173							chrII	6269663	6270250	289		chrII	9282454	9283196	423		chrII	11157552	11158059	268		chrII	6360805	6361166	173
chrII	6370045	6370541	240							chrII	6296749	6297195	234		chrII	9283469	9285984	724		chrII	11163247	11163606	146		chrII	6370045	6370541	240
chrII	6377383	6377772	154							chrII	6320913	6321393	260		chrII	9299666	9300033	148		chrII	11166327	11167478	929		chrII	6377383	6377772	154
chrII	6383156	6383560	198							chrII	6331261	6331885	316		chrII	9306769	9307307	302		chrII	11181168	11181613	247		chrII	6383156	6383560	198
chrII	6489741	6490134	198							chrII	6346384	6347099	341		chrII	9311659	9312007	140		chrII	11184888	11185229	132		chrII	6489741	6490134	198
chrII	6491660	6492204	244							chrII	6347560	6348903	1018		chrII	9322861	9323367	234		chrII	11189514	11189931	170		chrII	6491660	6492204	244
chrII	6498442	6498917	307							chrII	6355626	6356336	236		chrII	9343897	9344355	212		chrII	11205742	11206104	167		chrII	6498442	6498917	307
chrII	6522713	6523247	243							chrII	6360718	6361319	247		chrII	9356564	9357166	320		chrII	11223944	11224370	190		chrII	6522713	6523247	243
chrII	6561985	6562757	246							chrII	6370066	6370620	232		chrII	9416547	9417015	222		chrII	11238879	11239342	238		chrII	6561985	6562757	246
chrII	6588727	6589714	297							chrII	6383089	6383719	244		chrII	9484980	9485585	210		chrII	11293272	11293712	256		chrII	6588727	6589714	297
chrII	6642193	6642945	583							chrII	6453360	6453721	175		chrII	9485793	9486392	256		chrII	11307820	11308240	235		chrII	6642193	6642945	583
chrII	6644412	6644805	232							chrII	6489748	6490149	182		chrII	9487128	9488068	626		chrII	11316576	11317141	248		chrII	6644412	6644805	232
chrII	6683513	6684051	274							chrII	6491652	6492255	296		chrII	9493176	9493879	417		chrII	11335607	11336606	167		chrII	6683513	6684051	274
chrII	6689010	6689532	292							chrII	6535871	6536337	239		chrII	9497220	9497685	235		chrII	11345503	11345980	218		chrII	6689010	6689532	292
chrII	6705642	6706254	396							chrII	6563242	6563604	192		chrII	9498468	9499098	197		chrII	11347708	11348387	391		chrII	6705642	6706254	396
chrII	6706558	6707073	277							chrII	6564988	6565480	217		chrII	9500810	9501447	307		chrII	11353372	11353820	203		chrII	6706558	6707073	277
chrII	6707429	6708242	276							chrII	6588711	6589584	370		chrII	9501868	9502325	210		chrII	11376540	11376990	214		chrII	6707429	6708242	276
chrII	6708839	6709407	299							chrII	6600950	6601361	188		chrII	9565960	9566438	248		chrII	11452865	11453386	271		chrII	6708839	6709407	299
chrII	6709608	6710058	206							chrII	6609359	6609845	214		chrII	9576767	9577171	222		chrII	11464187	11464814	331		chrII	6709608	6710058	206
chrII	6727652	6728039	217							chrII	6683471	6684105	379		chrII	9590965	9591507	270		chrII	11472352	11472913	295		chrII	6727652	6728039	217
chrII	6729235	6729679	218							chrII	6707414	6708089	226		chrII	9600006	9602207	1239		chrII	11473483	11473935	241		chrII	6729235	6729679	218
chrII	6734615	6734976	210							chrII	6708818	6709434	343		chrII	9602479	9604835	1085		chrII	11484522	11484991	226		chrII	6734615	6734976	210
chrII	6745801	6746220	212							chrII	6721473	6721949	247		chrII	9605313	9605696	160		chrII	11492816	11493240	242		chrII	6745801	6746220	212
chrII	6776393	6777019	428							chrII	6729215	6729635	219		chrII	9605813	9607480	288		chrII	11534371	11535202	574		chrII	6776393	6777019	428
chrII	6782606	6783167	241							chrII	6734581	6735053	254		chrII	9619163	9619853	344		chrII	11545195	11545697	243		chrII	6782606	6783167	241
chrII	6808191	6808949	419							chrII	6741366	6741837	217		chrII	9619976	9620683	290		chrII	11547113	11547778	282		chrII	6808191	6808949	419
chrII	6812279	6812949	381							chrII	6776343	6777049	454		chrII	9620952	9622166	322		chrII	11596149	11596821	469		chrII	6812279	6812949	381
chrII	6819484	6819885	180							chrII	6782578	6783226	350		chrII	9644859	9645489	181		chrII	11611329	11611793	229		chrII	6819484	6819885	180
chrII	6820214	6820722	246							chrII	6794928	6795536	342		chrII	9645792	9646461	429		chrII	11617570	11618588	268		chrII	6820214	6820722	246
chrII	6820870	6822867	1663							chrII	6797709	6798223	274		chrII	9647002	9647481	242		chrII	11618943	11621175	1155		chrII	6820870	6822867	1663
chrII	6823150	6824906	916							chrII	6800114	6800761	307		chrII	9655832	9656585	531		chrII	11621446	11622054	354		chrII	6823150	6824906	916
chrII	6825687	6826240	268							chrII	6807555	6809304	1052		chrII	9668848	9669338	238		chrII	11632608	11633135	263		chrII	6825687	6826240	268
chrII	6826640	6827913	960							chrII	6809954	6812140	1882		chrII	9686770	9687249	244		chrII	11633968	11636302	317		chrII	6826640	6827913	960
chrII	6828034	6829734	1223							chrII	6812258	6814069	366		chrII	9690068	9690630	241		chrII	11636886	11638192	491		chrII	6828034	6829734	1223
chrII	6832697	6833462	522							chrII	6814233	6818524	3190		chrII	9695921	9696307	125		chrII	11641899	11642561	299		chrII	6832697	6833462	522
chrII	6834759	6835194	144							chrII	6819196	6821512	1255		chrII	9716544	9717017	218		chrII	11652669	11653059	211		chrII	6834759	6835194	144
chrII	6835457	6837705	227							chrII	6821593	6824262	869		chrII	9718576	9719072	247		chrII	11675905	11676318	178		chrII	6835457	6837705	227
chrII	6838155	6839835	951							chrII	6827277	6827827	333		chrII	9727129	9727583	265		chrII	11713457	11713927	180		chrII	6838155	6839835	951
chrII	6841063	6841450	200							chrII	6838210	6839727	978		chrII	9728404	9728842	243		chrII	11723978	11724886	562		chrII	6841063	6841450	200
chrII	6842357	6845300	417							chrII	6842566	6843073	241		chrII	9745969	9746436	234		chrII	11728384	11728899	253		chrII	6842357	6845300	417
chrII	6847719	6848784	465							chrII	6843580	6845101	762		chrII	9752217	9752598	154		chrII	11737207	11737696	329		chrII	6847719	6848784	465
chrII	6849130	6849743	314							chrII	6847437	6853993	5748		chrII	9752971	9753339	172		chrII	11746543	11747397	472		chrII	6849130	6849743	314
chrII	6852920	6853504	264							chrII	6858453	6860148	619		chrII	9774199	9775056	603		chrII	11749026	11750352	814		chrII	6852920	6853504	264
chrII	6858704	6859740	391							chrII	6860265	6860747	163		chrII	9786198	9786617	181		chrII	11751487	11751976	173		chrII	6858704	6859740	391
chrII	6888098	6888806	369							chrII	6861073	6863120	1463		chrII	9787263	9788017	288		chrII	11756632	11758117	309		chrII	6888098	6888806	369
chrII	6890664	6892200	686							chrII	6864639	6866620	309		chrII	9791120	9791578	198		chrII	11758922	11759982	486		chrII	6890664	6892200	686
chrII	6898020	6898577	186							chrII	6867775	6869780	1179		chrII	9807520	9807865	165		chrII	11760862	11762153	964		chrII	6898020	6898577	186
chrII	6909580	6910001	246							chrII	6870485	6871457	510		chrII	9891236	9892026	547		chrII	11777953	11778362	215		chrII	6909580	6910001	246
chrII	6913255	6913662	198							chrII	6879893	6880672	528		chrII	9892358	9892728	170		chrII	11813884	11814282	217		chrII	6913255	6913662	198
chrII	6915769	6916119	180							chrII	6887511	6888981	833		chrII	9930917	9931324	220		chrII	11836460	11836967	223		chrII	6915769	6916119	180
chrII	6926038	6927343	588							chrII	6889095	6892162	2258		chrII	9937418	9938025	324		chrII	11838257	11838667	226		chrII	6926038	6927343	588
chrII	6928269	6928842	324							chrII	6897335	6897672	191		chrII	9940347	9940800	200		chrII	11839127	11839862	216		chrII	6928269	6928842	324
chrII	6929996	6930349	191							chrII	6897930	6898741	283		chrII	9968223	9968653	233		chrII	11841533	11842205	239		chrII	6929996	6930349	191
chrII	6940642	6941237	208							chrII	6908650	6909099	229		chrII	9974145	9974566	199		chrII	11874575	11875131	220		chrII	6940642	6941237	208
chrII	6941333	6942463	316							chrII	6909414	6910067	335		chrII	9974810	9975379	271		chrII	11959137	11959512	164		chrII	6941333	6942463	316
chrII	6942779	6944111	1020							chrII	6912939	6913863	534		chrII	9984642	9985624	329		chrII	11960570	11960986	187		chrII	6942779	6944111	1020
chrII	6951257	6951843	275							chrII	6915260	6917385	695		chrII	9989530	9989873	145		chrII	11967390	11967937	258		chrII	6951257	6951843	275
chrII	6957464	6957841	173							chrII	6925965	6927158	634		chrII	9992351	9992807	219		chrII	11973427	11975266	1349		chrII	6957464	6957841	173
chrII	6959831	6960281	215							chrII	6928389	6928790	233		chrII	10015963	10016427	232		chrII	11979610	11980503	650		chrII	6959831	6960281	215
chrII	6960725	6961117	198							chrII	6943583	6944208	217		chrII	10019588	10020141	275		chrII	12006571	12007063	258		chrII	6960725	6961117	198
chrII	6968259	6968728	249							chrII	6950607	6951938	927		chrII	10028868	10029470	280		chrII	12040046	12040548	234		chrII	6968259	6968728	249
chrII	6973954	6974328	191							chrII	6955006	6955669	391		chrII	10033346	10033958	284		chrII	12041898	12043026	747		chrII	6973954	6974328	191
chrII	6992704	6993449	405							chrII	6957443	6957935	246		chrII	10034590	10035098	278		chrII	12050503	12050975	235		chrII	6992704	6993449	405
chrII	6994552	6995182	293							chrII	6959749	6960338	310		chrII	10168899	10169785	541		chrII	12052832	12053753	263		chrII	6994552	6995182	293
chrII	6995564	6996274	525							chrII	6960629	6961254	357		chrII	10174246	10174740	259		chrII	12089486	12090149	225		chrII	6995564	6996274	525
chrII	7022376	7023012	358							chrII	6967441	6968836	308		chrII	10197056	10197436	191		chrII	12102197	12102794	316		chrII	7022376	7023012	358
chrII	7025103	7025817	460							chrII	6973596	6974408	575		chrII	10200716	10201120	243		chrII	12107708	12108145	215		chrII	7025103	7025817	460
chrII	7050112	7050480	205							chrII	6992681	6993367	298		chrII	10202218	10202653	224		chrII	12222365	12222915	289		chrII	7050112	7050480	205
chrII	7059140	7059717	278							chrII	7001327	7001828	223		chrII	10203122	10203470	134		chrII	12261170	12261658	393		chrII	7059140	7059717	278
chrII	7072503	7073544	301							chrII	7002862	7003424	289		chrII	10247533	10247973	130		chrII	12339090	12339504	179		chrII	7072503	7073544	301
chrII	7104943	7105362	195							chrII	7010243	7011116	498		chrII	10248207	10248760	290		chrII	12372466	12372838	208		chrII	7104943	7105362	195
chrII	7110981	7111400	257							chrII	7022481	7022947	249		chrII	10284662	10285242	273		chrII	12382508	12383074	228		chrII	7110981	7111400	257
chrII	7151896	7152439	227							chrII	7025160	7025833	251		chrII	10294161	10294566	185		chrII	12417928	12418298	244		chrII	7151896	7152439	227
chrII	7176106	7176864	140							chrII	7042020	7042451	174		chrII	10300200	10301308	887		chrII	12459349	12459805	237		chrII	7176106	7176864	140
chrII	7182563	7183137	281							chrII	7050107	7050547	212		chrII	10303628	10304062	244		chrII	12494429	12494916	242		chrII	7182563	7183137	281
chrII	7183889	7184256	200							chrII	7072481	7073057	284		chrII	10370726	10371136	211		chrII	12499910	12500245	169		chrII	7183889	7184256	200
chrII	7199960	7200440	183							chrII	7104936	7105337	209		chrII	10373411	10373935	235		chrII	12615297	12615792	262		chrII	7199960	7200440	183
chrII	7238150	7238609	274							chrII	7111603	7112037	206		chrII	10382078	10382658	367		chrII	12622051	12622530	234		chrII	7238150	7238609	274
chrII	7272502	7272878	216							chrII	7131832	7132296	243		chrII	10387962	10389482	385		chrII	12622669	12623171	219		chrII	7272502	7272878	216
chrII	7277864	7278357	231							chrII	7151938	7152475	197		chrII	10389616	10390853	310		chrII	12625564	12626063	247		chrII	7277864	7278357	231
chrII	7279735	7280272	241							chrII	7176169	7176574	107		chrII	10395269	10395744	259		chrII	12659853	12660366	206		chrII	7279735	7280272	241
chrII	7287114	7288080	748							chrII	7182642	7183101	228		chrII	10444904	10448145	1517		chrII	12664897	12665366	190		chrII	7287114	7288080	748
chrII	7301592	7302027	229							chrII	7183801	7184311	283		chrII	10449726	10450829	768		chrII	12668741	12669166	222		chrII	7301592	7302027	229
chrII	7323089	7324330	337							chrII	7199922	7200526	247		chrII	10501454	10501968	255		chrII	12677753	12678642	264		chrII	7323089	7324330	337
chrII	7324890	7325942	437							chrII	7301537	7302147	279		chrII	10502451	10503112	316		chrII	12679471	12679957	222		chrII	7324890	7325942	437
chrII	7326162	7327463	966							chrII	7309919	7310410	234		chrII	10504667	10505202	275		chrII	12738704	12739134	224		chrII	7326162	7327463	966
chrII	7328194	7328868	461							chrII	7319205	7320402	465		chrII	10527494	10527998	249		chrII	12768214	12768786	214		chrII	7328194	7328868	461
chrII	7336953	7338580	704							chrII	7323253	7323572	161		chrII	10537844	10538330	271		chrII	12778342	12778705	138		chrII	7336953	7338580	704
chrII	7338899	7339457	238							chrII	7326277	7327544	797		chrII	10541776	10544344	328		chrII	12797068	12797626	160		chrII	7338899	7339457	238
chrII	7339645	7340343	319							chrII	7328239	7329024	399		chrII	10545850	10547321	624		chrII	12798488	12799264	365		chrII	7339645	7340343	319
chrII	7341409	7343614	1628							chrII	7336913	7337972	693		chrII	10547420	10551534	1538		chrII	12799866	12800432	315		chrII	7341409	7343614	1628
chrII	7352493	7353004	223							chrII	7348671	7350024	648		chrII	10551653	10552768	439		chrII	12805584	12806126	254		chrII	7352493	7353004	223
chrII	7356739	7357646	225							chrII	7352301	7352960	408		chrII	10555223	10556424	371		chrII	12878526	12879024	233		chrII	7356739	7357646	225
chrII	7380457	7380794	155							chrII	7356710	7357409	279		chrII	10556579	10557910	784		chrII	12914655	12915045	178		chrII	7380457	7380794	155
chrII	7391926	7392491	281							chrII	7363926	7364454	219		chrII	10558008	10560094	1020		chrII	12944380	12945153	477		chrII	7391926	7392491	281
chrII	7393551	7394333	578							chrII	7374006	7374570	302		chrII	10563218	10563791	280		chrII	12953226	12953638	254		chrII	7393551	7394333	578
chrII	7405240	7405674	189							chrII	7380394	7380843	222		chrII	10567235	10567602	215		chrII	12981970	12982375	147		chrII	7405240	7405674	189
chrII	7418005	7418328	146							chrII	7392005	7392426	233		chrII	10568573	10568909	160		chrII	13004409	13004822	204		chrII	7418005	7418328	146
chrII	7461690	7462045	143							chrII	7397285	7397890	339		chrII	10658630	10659142	274		chrII	13006103	13006713	292		chrII	7461690	7462045	143
chrII	7478635	7479220	226							chrII	7478585	7479244	255		chrII	10743436	10744195	345		chrII	13016251	13016794	248		chrII	7478635	7479220	226
chrII	7487441	7487909	362							chrII	7528977	7529479	282		chrII	10744658	10745258	313		chrII	13030642	13031169	282		chrII	7487441	7487909	362
chrII	7489805	7490404	157							chrII	7537566	7537987	216		chrII	10758907	10759334	228		chrII	13064932	13065623	432		chrII	7489805	7490404	157
chrII	7499826	7500225	189							chrII	7554878	7555220	160		chrII	10761614	10762103	176		chrII	13066744	13067280	195		chrII	7499826	7500225	189
chrII	7528159	7528564	222							chrII	7592995	7593643	375		chrII	10769087	10769538	177		chrII	13149785	13150296	248		chrII	7528159	7528564	222
chrII	7528924	7529567	341							chrII	7598791	7599335	272		chrII	10798372	10799273	250		chrII	13156847	13157355	241		chrII	7528924	7529567	341
chrII	7537558	7537968	225							chrII	7607598	7608533	284		chrII	10800052	10800595	251		chrII	13189178	13189738	335		chrII	7537558	7537968	225
chrII	7554814	7555212	203							chrII	7615307	7615769	234		chrII	10804387	10804839	207		chrII	13195100	13195556	221		chrII	7554814	7555212	203
chrII	7588252	7588586	204							chrII	7623259	7623870	336		chrII	10806276	10806781	231		chrII	13199575	13200116	261		chrII	7588252	7588586	204
chrII	7592957	7593701	398							chrII	7626615	7627426	184		chrII	10823963	10824381	213		chrII	13237730	13238188	237		chrII	7592957	7593701	398
chrII	7594230	7594583	192							chrII	7641975	7642725	316		chrII	10829554	10830041	166		chrII	13291150	13292033	460		chrII	7594230	7594583	192
chrII	7615337	7615718	224							chrII	7650997	7651658	325		chrII	10830304	10830877	280		chrII	13292795	13293316	284		chrII	7615337	7615718	224
chrII	7623109	7623830	519							chrII	7652136	7653007	191		chrII	10835025	10836214	673		chrII	13334823	13335770	568		chrII	7623109	7623830	519
chrII	7624976	7625655	463							chrII	7655535	7656332	515		chrII	10850964	10851579	304		chrII	13369157	13369566	213		chrII	7624976	7625655	463
chrII	7631141	7632186	220							chrII	7657369	7658327	244		chrII	10861691	10863138	741		chrII	13447558	13448059	235		chrII	7631141	7632186	220
chrII	7639226	7640737	1042							chrII	7662067	7662653	354		chrII	10868647	10869174	272		chrII	13460510	13462524	1660		chrII	7639226	7640737	1042
chrII	7641895	7642807	367							chrII	7664203	7664576	197		chrII	10872448	10872913	246		chrII	13465125	13466031	405		chrII	7641895	7642807	367
chrII	7651096	7651530	273							chrII	7669337	7669851	231		chrII	10924616	10925030	216		chrII	13469061	13469869	277		chrII	7651096	7651530	273
chrII	7669386	7669768	154							chrII	7684510	7685557	383		chrII	10950028	10950542	261		chrII	13575524	13575908	142		chrII	7669386	7669768	154
chrII	7714660	7715133	239							chrII	7698864	7699430	305		chrII	10990490	10990849	164		chrII	13596519	13596905	165		chrII	7714660	7715133	239
chrII	7715725	7716514	432							chrII	7708467	7708971	253		chrII	11020614	11021054	267		chrII	13609557	13610029	207		chrII	7715725	7716514	432
chrII	7718920	7719325	195							chrII	7715770	7716372	221		chrII	11021958	11022386	181		chrII	13617797	13618210	193		chrII	7718920	7719325	195
chrII	7756788	7757295	270							chrII	7756680	7757262	286		chrII	11041754	11042330	288		chrII	13632204	13632635	208		chrII	7756788	7757295	270
chrII	7758344	7758748	218							chrII	7758156	7758835	409		chrII	11042513	11043475	599		chrII	13637839	13639041	812		chrII	7758344	7758748	218
chrII	7776335	7777100	531							chrII	7781028	7781453	225		chrII	11049794	11050234	227		chrII	13640105	13640557	247		chrII	7776335	7777100	531
chrII	7777200	7777596	217							chrII	7790237	7790831	159		chrII	11097251	11097760	239		chrII	13664239	13664732	268		chrII	7777200	7777596	217
chrII	7791281	7792059	497							chrII	7816123	7816711	180		chrII	11102961	11103409	245		chrII	13665209	13665585	152		chrII	7791281	7792059	497
chrII	7801853	7802239	197							chrII	7832031	7832967	334		chrII	11126295	11126766	240		chrII	13673527	13674315	537		chrII	7801853	7802239	197
chrII	7806735	7807219	268							chrII	7838586	7838985	184		chrII	11132439	11132766	212		chrII	13675253	13675692	120		chrII	7806735	7807219	268
chrII	7808114	7808466	188							chrII	7839557	7840011	212		chrII	11157586	11158028	243		chrII	13678163	13679195	523		chrII	7808114	7808466	188
chrII	7808836	7809436	407							chrII	7857295	7857929	300		chrII	11181139	11181599	204		chrII	13679654	13680286	381		chrII	7808836	7809436	407
chrII	7816131	7816620	315							chrII	7860235	7860703	228		chrII	11184874	11185191	191		chrII	13680926	13681406	230		chrII	7816131	7816620	315
chrII	7836342	7837081	461							chrII	7864036	7864575	285		chrII	11223913	11224337	218		chrII	13736730	13737212	227		chrII	7836342	7837081	461
chrII	7838573	7839026	226							chrII	7870412	7871030	373		chrII	11238867	11239373	255		chrII	13737620	13738408	285		chrII	7838573	7839026	226
chrII	7857388	7857857	248							chrII	7873862	7874503	254		chrII	11293344	11293730	166		chrII	13813391	13813887	249		chrII	7857388	7857857	248
chrII	7860272	7860680	197							chrII	7879161	7879727	273		chrII	11305106	11306377	731		chrII	13817740	13818434	411		chrII	7860272	7860680	197
chrII	7870441	7870994	363							chrII	7884785	7885276	284		chrII	11316465	11317174	224		chrII	13819749	13820226	245		chrII	7870441	7870994	363
chrII	7873927	7874401	169							chrII	7887135	7887656	252		chrII	11328934	11329524	229		chrII	13821222	13821858	363		chrII	7873927	7874401	169
chrII	7884806	7885302	250							chrII	7891769	7892555	280		chrII	11335616	11336160	258		chrII	13823196	13823697	236		chrII	7884806	7885302	250
chrII	7886536	7886907	182							chrII	7894423	7895441	875		chrII	11345526	11345968	216		chrII	13825076	13825550	256		chrII	7886536	7886907	182
chrII	7887175	7887696	246							chrII	7899606	7906515	889		chrII	11347720	11348497	400		chrII	13826896	13827459	279		chrII	7887175	7887696	246
chrII	7888538	7889137	309							chrII	7906946	7909633	2468		chrII	11353381	11353781	177		chrII	13829057	13829940	433		chrII	7888538	7889137	309
chrII	7891723	7892530	348							chrII	7910365	7911247	264		chrII	11412108	11412512	131		chrII	13834199	13835023	279		chrII	7891723	7892530	348
chrII	7894174	7895502	1095							chrII	7944407	7945720	900		chrII	11440087	11440569	231		chrII	13872371	13872861	254		chrII	7894174	7895502	1095
chrII	7920183	7920579	186							chrII	7994247	7995501	239		chrII	11452865	11453409	277		chrII	13888168	13888651	257		chrII	7920183	7920579	186
chrII	7921049	7921547	267							chrII	8011454	8012796	771		chrII	11464019	11464792	532		chrII	13903130	13903756	468		chrII	7921049	7921547	267
chrII	7945065	7945528	231							chrII	8015307	8017550	1692		chrII	11472421	11472920	270		chrII	13908558	13908922	147		chrII	7945065	7945528	231
chrII	7963534	7964037	218							chrII	8028039	8028978	364		chrII	11473449	11473936	263		chrII	13976065	13976507	221		chrII	7963534	7964037	218
chrII	7968033	7968708	240							chrII	8033718	8034204	321		chrII	11484509	11485030	233		chrII	14018092	14018598	279		chrII	7968033	7968708	240
chrII	7969187	7969745	454							chrII	8039286	8039821	289		chrII	11492861	11493229	121		chrII	14036555	14037146	264		chrII	7969187	7969745	454
chrII	7977483	7977785	124							chrII	8041593	8042002	212		chrII	11534354	11535295	579		chrII	14037579	14038283	354		chrII	7977483	7977785	124
chrII	7979100	7979833	310							chrII	8062095	8062796	292		chrII	11545143	11545820	268		chrII	14039905	14040929	460		chrII	7979100	7979833	310
chrII	7980944	7982075	924							chrII	8071390	8072110	496		chrII	11547044	11547747	374		chrII	14043733	14044684	589		chrII	7980944	7982075	924
chrII	7983681	7984356	454							chrII	8075167	8075731	269		chrII	11595556	11595955	152		chrII	14048929	14049449	234		chrII	7983681	7984356	454
chrII	7984710	7985368	146							chrII	8086660	8087267	294		chrII	11596050	11596674	239		chrII	14050290	14050836	264		chrII	7984710	7985368	146
chrII	7985670	7986052	124							chrII	8091387	8091962	255		chrII	11611333	11611844	272		chrII	14059650	14060154	250		chrII	7985670	7986052	124
chrII	7986743	7987185	176							chrII	8104912	8105444	252		chrII	11614128	11614623	289		chrII	14062941	14063428	257		chrII	7986743	7987185	176
chrII	7990186	7990541	174							chrII	8106934	8107764	314		chrII	11616086	11616635	267		chrII	14141948	14142520	233		chrII	7990186	7990541	174
chrII	7991250	7991679	229							chrII	8114449	8114884	206		chrII	11617480	11618058	329		chrII	14143685	14144131	215		chrII	7991250	7991679	229
chrII	8011273	8012867	1016							chrII	8124779	8125351	245		chrII	11619014	11621063	1062		chrII	14154242	14154705	234		chrII	8011273	8012867	1016
chrII	8015384	8017544	1566							chrII	8125991	8126604	264		chrII	11621483	11621995	286		chrII	14195739	14196282	270		chrII	8015384	8017544	1566
chrII	8028106	8028949	313							chrII	8128402	8129190	450		chrII	11632603	11633144	248		chrII	14233908	14235019	743		chrII	8028106	8028949	313
chrII	8039309	8039817	272							chrII	8131262	8132064	228		chrII	11633867	11637864	435		chrII	14244363	14244871	314		chrII	8039309	8039817	272
chrII	8062164	8062666	226							chrII	8136829	8138302	697		chrII	11641934	11642507	203		chrII	14249441	14250754	915		chrII	8062164	8062666	226
chrII	8070973	8072289	983							chrII	8143153	8143815	274		chrII	11694352	11694800	236		chrII	14251185	14252038	495		chrII	8070973	8072289	983
chrII	8075261	8075657	194							chrII	8157917	8158322	206		chrII	11722787	11723220	268		chrII	14296230	14296706	283		chrII	8075261	8075657	194
chrII	8086764	8087197	183							chrII	8162186	8162580	223		chrII	11724018	11724825	522		chrII	14301854	14302203	225		chrII	8086764	8087197	183
chrII	8091447	8091816	172							chrII	8184850	8185383	317		chrII	11728349	11729121	264		chrII	14349368	14349824	260		chrII	8091447	8091816	172
chrII	8104989	8105413	225							chrII	8216297	8216743	226		chrII	11732544	11732909	169		chrII	14357812	14358263	240		chrII	8104989	8105413	225
chrII	8107038	8107428	237							chrII	8222506	8223044	302		chrII	11743066	11743787	404		chrII	14365148	14365559	193		chrII	8107038	8107428	237
chrII	8124848	8125274	212							chrII	8229218	8229577	155		chrII	11746463	11747528	565		chrII	14383527	14384010	245		chrII	8124848	8125274	212
chrII	8126018	8126530	244							chrII	8276033	8276422	196		chrII	11748991	11750410	761		chrII	14399459	14399981	255		chrII	8126018	8126530	244
chrII	8128077	8129903	342							chrII	8325027	8325500	268		chrII	11751360	11752110	394		chrII	14404152	14404572	200		chrII	8128077	8129903	342
chrII	8130736	8132048	734							chrII	8328861	8329307	216		chrII	11756596	11762288	2815		chrII	14404855	14408289	376		chrII	8130736	8132048	734
chrII	8137301	8137801	277							chrII	8428853	8429339	214		chrII	11777803	11778399	384		chrII	14437820	14438269	263		chrII	8137301	8137801	277
chrII	8143222	8143643	204							chrII	8442156	8442686	237		chrII	11813857	11814355	243		chrII	14441048	14441451	220		chrII	8143222	8143643	204
chrII	8162190	8162549	193							chrII	8464364	8464942	309		chrII	11836449	11836981	240		chrII	14489278	14489743	246		chrII	8162190	8162549	193
chrII	8184927	8185362	203							chrII	8479781	8481493	1565		chrII	11838256	11838689	209		chrII	14494318	14495735	1153		chrII	8184927	8185362	203
chrII	8216332	8216796	215							chrII	8483112	8484099	301		chrII	11839091	11839776	219		chrII	14496633	14497192	293		chrII	8216332	8216796	215
chrII	8222566	8223017	261							chrII	8516707	8517167	212		chrII	11841555	11842082	226		chrII	14528212	14528646	241		chrII	8222566	8223017	261
chrII	8229254	8229637	204							chrII	8525234	8525776	245		chrII	11843423	11843744	86		chrII	14561499	14562075	289		chrII	8229254	8229637	204
chrII	8259563	8260018	229							chrII	8546849	8547419	263		chrII	11852158	11852485	200		chrII	14563685	14564116	194		chrII	8259563	8260018	229
chrII	8263369	8263910	292							chrII	8561115	8561631	254		chrII	11874552	11875087	249		chrII	14569199	14569673	212		chrII	8263369	8263910	292
chrII	8288606	8291001	1540							chrII	8565992	8566430	208		chrII	11880294	11881166	346		chrII	14598268	14598714	226		chrII	8288606	8291001	1540
chrII	8311439	8312335	227							chrII	8569232	8569725	236		chrII	11959117	11959567	205		chrII	14635152	14636196	724		chrII	8311439	8312335	227
chrII	8319770	8320087	164							chrII	8572777	8573176	214		chrII	11960483	11961017	271		chrII	14645211	14645613	205		chrII	8319770	8320087	164
chrII	8328900	8329305	185							chrII	8587696	8588164	245		chrII	11967311	11967939	363		chrII	14673505	14673979	243		chrII	8328900	8329305	185
chrII	8353298	8353758	242							chrII	8589091	8589645	297		chrII	11974258	11975131	200		chrII	14794820	14795337	279		chrII	8353298	8353758	242
chrII	8354211	8354548	154							chrII	8602228	8602686	239		chrII	11979549	11980515	689		chrII	14801128	14801651	247		chrII	8354211	8354548	154
chrII	8382796	8383283	250							chrII	8603529	8603941	188		chrII	12006568	12007082	264		chrII	14804131	14804869	343		chrII	8382796	8383283	250
chrII	8440040	8440457	185							chrII	8650508	8651005	316		chrII	12039967	12040590	370		chrII	14814866	14815267	174		chrII	8440040	8440457	185
chrII	8440694	8441219	277							chrII	8661467	8661916	223		chrII	12041880	12042912	291		chrII	14818224	14818689	222		chrII	8440694	8441219	277
chrII	8441977	8442561	324							chrII	8683718	8684342	340		chrII	12052887	12053815	216		chrII	14822271	14822768	268		chrII	8441977	8442561	324
chrII	8451411	8451844	228							chrII	8700980	8701543	213		chrII	12089461	12090217	292		chrII	14838508	14838965	235		chrII	8451411	8451844	228
chrII	8459939	8460501	333							chrII	8706905	8707349	225		chrII	12102194	12102825	342		chrII	14864126	14864694	226		chrII	8459939	8460501	333
chrII	8464470	8464864	205							chrII	8716256	8716804	233		chrII	12107689	12108160	245		chrII	14864996	14865525	236		chrII	8464470	8464864	205
chrII	8480816	8481624	419							chrII	8735009	8735698	272		chrII	12208627	12209060	224		chrII	14938232	14938642	213		chrII	8480816	8481624	419
chrII	8483143	8484234	801							chrII	8738340	8739176	207		chrII	12222267	12222999	372		chrII	14939137	14939788	95		chrII	8483143	8484234	801
chrII	8485488	8485979	291							chrII	8739439	8742494	1951		chrII	12261097	12261663	229		chrII	14969243	14969658	201		chrII	8485488	8485979	291
chrII	8498977	8499379	198							chrII	8742639	8748321	503		chrII	12268836	12269287	211		chrII	15014306	15014704	279		chrII	8498977	8499379	198
chrII	8504308	8504827	203							chrII	8753679	8754532	235		chrII	12339041	12339490	269		chrII	15015572	15015985	255		chrII	8504308	8504827	203
chrII	8516758	8517070	144							chrII	8761646	8762218	283		chrII	12382471	12383078	364		chrII	15025444	15026151	450		chrII	8516758	8517070	144
chrII	8546935	8547334	224							chrII	8769289	8770308	255		chrII	12459348	12459825	240		chrII	15042523	15043382	356		chrII	8546935	8547334	224
chrII	8559190	8559514	169							chrII	8784356	8784899	254		chrII	12494450	12494915	229		chrII	15043617	15044282	386		chrII	8559190	8559514	169
chrII	8561136	8561642	245							chrII	8787267	8787846	281		chrII	12499899	12500289	217		chrII	15165779	15166189	219		chrII	8561136	8561642	245
chrII	8569259	8569702	216							chrII	8789785	8790464	318		chrII	12615304	12615743	239		chrII	15189846	15190365	308		chrII	8569259	8569702	216
chrII	8572796	8573136	127							chrII	8796250	8796946	339		chrII	12622053	12622503	227		chrII	15193699	15194425	361		chrII	8572796	8573136	127
chrII	8585203	8585597	197							chrII	8810845	8811490	298		chrII	12625542	12626057	256		chrII	15205130	15205676	289		chrII	8585203	8585597	197
chrII	8587558	8588758	284							chrII	8819298	8821429	312		chrII	12657550	12658075	225		chrII	15208086	15208956	675		chrII	8587558	8588758	284
chrII	8589076	8589611	306							chrII	8845912	8846404	231		chrII	12659315	12660444	841		chrII	15212059	15213020	606		chrII	8589076	8589611	306
chrII	8602247	8602674	235							chrII	8863001	8863403	228		chrII	12661888	12662288	161		chrII	15213583	15214698	282		chrII	8602247	8602674	235
chrII	8637666	8638107	237							chrII	8884175	8884648	192		chrII	12664867	12665491	268		chrII	15232608	15233073	227		chrII	8637666	8638107	237
chrII	8661544	8661904	170							chrII	8912133	8912853	177		chrII	12665574	12666146	225		chrII	15255660	15256152	262		chrII	8661544	8661904	170
chrII	8683707	8684226	338							chrII	8927158	8927685	213		chrII	12667659	12668012	172		chrII	15258540	15259031	277		chrII	8683707	8684226	338
chrII	8706990	8707364	170							chrII	8930907	8932180	907		chrII	12668377	12669713	607		chrII	15262947	15263426	221		chrII	8706990	8707364	170
chrII	8716350	8716672	114							chrII	8933641	8934305	308		chrII	12670430	12670777	215		chrIII	25402	26083	305		chrII	8716350	8716672	114
chrII	8717511	8717892	191							chrII	8938786	8939219	167		chrII	12672295	12672847	218		chrIII	29549	30815	1005		chrII	8717511	8717892	191
chrII	8740150	8740974	384							chrII	8940216	8940799	289		chrII	12677721	12678667	282		chrIII	62022	63541	564		chrII	8740150	8740974	384
chrII	8741210	8745316	942							chrII	8945149	8945759	226		chrII	12679521	12680005	245		chrIII	63818	66435	1887		chrII	8741210	8745316	942
chrII	8745807	8746673	754							chrII	8962143	8962601	216		chrII	12738769	12739166	184		chrIII	66589	67615	679		chrII	8745807	8746673	754
chrII	8746911	8747721	673							chrII	8964684	8965160	290		chrII	12768125	12768740	356		chrIII	87134	87638	236		chrII	8746911	8747721	673
chrII	8765106	8765576	233							chrII	8969109	8969753	289		chrII	12787631	12788339	303		chrIII	89054	89583	299		chrII	8765106	8765576	233
chrII	8784249	8784917	380							chrII	8973513	8974089	255		chrII	12796942	12797881	612		chrIII	131648	132002	194		chrII	8784249	8784917	380
chrII	8785646	8786365	426							chrII	8992557	8993188	365		chrII	12798451	12799340	492		chrIII	188416	188768	181		chrII	8785646	8786365	426
chrII	8787155	8787782	390							chrII	8997207	8997949	403		chrII	12799899	12800425	281		chrIII	235091	235554	230		chrII	8787155	8787782	390
chrII	8796325	8796870	260							chrII	9002004	9002622	404		chrII	12805603	12806188	259		chrIII	269581	269947	199		chrII	8796325	8796870	260
chrII	8799655	8800060	217							chrII	9013075	9013612	394		chrII	12878594	12879105	266		chrIII	343599	344207	239		chrII	8799655	8800060	217
chrII	8810992	8811369	190							chrII	9014971	9015485	152		chrII	12914615	12915067	206		chrIII	349361	350324	567		chrII	8810992	8811369	190
chrII	8813363	8814492	445							chrII	9034986	9035540	298		chrII	12944404	12945153	449		chrIII	354553	355397	391		chrII	8813363	8814492	445
chrII	8818197	8818705	297							chrII	9038588	9039712	284		chrII	12953280	12953671	211		chrIII	482745	483091	203		chrII	8818197	8818705	297
chrII	8819170	8821522	225							chrII	9054480	9055003	272		chrII	12995854	12996512	430		chrIII	502572	503062	216		chrII	8819170	8821522	225
chrII	8822140	8823455	696							chrII	9057168	9057814	211		chrII	13002888	13003451	443		chrIII	529718	530363	410		chrII	8822140	8823455	696
chrII	8830870	8831243	160							chrII	9060034	9060690	385		chrII	13004276	13004846	368		chrIII	534982	535548	407		chrII	8830870	8831243	160
chrII	8844765	8845136	124							chrII	9061645	9062296	295		chrII	13006096	13006712	267		chrIII	598158	598557	207		chrII	8844765	8845136	124
chrII	8884253	8884716	168							chrII	9076229	9076773	287		chrII	13016245	13016843	282		chrIII	623722	624190	223		chrII	8884253	8884716	168
chrII	8912206	8912905	519							chrII	9092793	9093288	291		chrII	13029230	13030174	700		chrIII	640367	640855	253		chrII	8912206	8912905	519
chrII	8916591	8917029	210							chrII	9094127	9094694	276		chrII	13030606	13031198	308		chrIII	668243	668805	274		chrII	8916591	8917029	210
chrII	8917463	8918074	414							chrII	9098844	9099399	299		chrII	13061887	13062830	578		chrIII	670904	671477	288		chrII	8917463	8918074	414
chrII	8927198	8927573	207							chrII	9102583	9102991	164		chrII	13064939	13065752	295		chrIII	764300	764845	348		chrII	8927198	8927573	207
chrII	8931236	8932070	578							chrII	9106927	9107477	181		chrII	13066670	13067389	291		chrIII	783213	783710	228		chrII	8931236	8932070	578
chrII	8945136	8945467	133							chrII	9108354	9108925	219		chrII	13071124	13071751	359		chrIII	793555	794068	234		chrII	8945136	8945467	133
chrII	8955710	8956314	494							chrII	9109021	9109606	224		chrII	13083659	13084100	215		chrIII	832650	836485	1201		chrII	8955710	8956314	494
chrII	8956858	8957475	195							chrII	9112792	9113243	178		chrII	13117018	13117478	244		chrIII	843960	844445	242		chrII	8956858	8957475	195
chrII	8958915	8959636	296							chrII	9131863	9134276	406		chrII	13149869	13150294	227		chrIII	845377	845937	302		chrII	8958915	8959636	296
chrII	8962110	8962562	219							chrII	9169336	9169800	232		chrII	13156827	13157332	234		chrIII	887693	888760	439		chrII	8962110	8962562	219
chrII	8969162	8969648	231							chrII	9176966	9177502	235		chrII	13187069	13187561	213		chrIII	989494	989881	218		chrII	8969162	8969648	231
chrII	9008120	9008586	295							chrII	9211638	9212059	203		chrII	13189269	13189695	164		chrIII	1017307	1020641	2056		chrII	9008120	9008586	295
chrII	9010321	9011230	497							chrII	9242717	9243171	253		chrII	13195016	13195545	279		chrIII	1037124	1037580	221		chrII	9010321	9011230	497
chrII	9011763	9012234	240							chrII	9255368	9257186	1157		chrII	13199586	13200172	227		chrIII	1080494	1080989	239		chrII	9011763	9012234	240
chrII	9013261	9013928	238							chrII	9257322	9259434	910		chrII	13237718	13238230	239		chrIII	1122291	1122675	171		chrII	9013261	9013928	238
chrII	9014803	9015295	227							chrII	9259738	9260394	359		chrII	13290370	13291953	1255		chrIII	1131494	1131936	188		chrII	9014803	9015295	227
chrII	9054554	9054959	190							chrII	9261868	9262564	326		chrII	13292779	13293276	247		chrIII	1136805	1137243	206		chrII	9054554	9054959	190
chrII	9057183	9057596	221							chrII	9264697	9266557	335		chrII	13334866	13335805	478		chrIII	1142725	1143257	266		chrII	9057183	9057596	221
chrII	9060126	9062551	293							chrII	9268964	9270113	251		chrII	13337880	13338282	198		chrIII	1202090	1202591	245		chrII	9060126	9062551	293
chrII	9076476	9076780	164							chrII	9270274	9272008	1032		chrII	13369165	13369583	160		chrIII	1207821	1208277	248		chrII	9076476	9076780	164
chrII	9078313	9078639	152							chrII	9273575	9275435	503		chrII	13447555	13448275	247		chrIII	1218225	1218605	149		chrII	9078313	9078639	152
chrII	9098928	9099307	213							chrII	9281528	9282151	224		chrII	13460524	13461202	278		chrIII	1225613	1225963	176		chrII	9098928	9099307	213
chrII	9107097	9107529	100							chrII	9282506	9283452	420		chrII	13461686	13462565	474		chrIII	1279119	1279533	206		chrII	9107097	9107529	100
chrII	9108396	9108863	224							chrII	9283688	9286597	1708		chrII	13465133	13466093	267		chrIII	1299657	1300775	370		chrII	9108396	9108863	224
chrII	9109024	9109653	265							chrII	9288935	9290039	264		chrII	13469109	13469869	227		chrIII	1301307	1302952	1233		chrII	9109024	9109653	265
chrII	9112647	9114061	350							chrII	9290360	9292184	1405		chrII	13477117	13477546	211		chrIII	1418627	1419201	245		chrII	9112647	9114061	350
chrII	9117526	9118334	396							chrII	9293577	9296191	2135		chrII	13575478	13575915	163		chrIII	1419612	1420721	385		chrII	9117526	9118334	396
chrII	9120754	9121346	297							chrII	9319316	9319765	221		chrII	13609561	13610018	240		chrIII	1424276	1424778	248		chrII	9120754	9121346	297
chrII	9127928	9128525	404							chrII	9322855	9323355	204		chrII	13617799	13618198	176		chrIII	1533107	1533894	166		chrII	9127928	9128525	404
chrII	9160058	9161421	262							chrII	9352525	9352998	271		chrII	13637836	13638973	848		chrIII	1558409	1558861	207		chrII	9160058	9161421	262
chrII	9176984	9177425	224							chrII	9356611	9357112	240		chrII	13664250	13664791	259		chrIII	1591561	1592070	227		chrII	9176984	9177425	224
chrII	9207344	9207713	244							chrII	9416579	9417002	202		chrII	13673507	13674378	365		chrIII	1604283	1604945	485		chrII	9207344	9207713	244
chrII	9207963	9208479	279							chrII	9487434	9487884	232		chrII	13675128	13675734	270		chrIII	1616163	1617148	539		chrII	9207963	9208479	279
chrII	9208757	9209093	148							chrII	9500787	9501519	291		chrII	13678227	13679135	515		chrIII	1618843	1619371	264		chrII	9208757	9209093	148
chrII	9211725	9212079	136							chrII	9501971	9502392	114		chrII	13679659	13680307	381		chrIII	1680921	1681423	219		chrII	9211725	9212079	136
chrII	9231151	9231533	190							chrII	9557328	9557822	257		chrII	13680905	13681413	250		chrIII	1731786	1732193	205		chrII	9231151	9231533	190
chrII	9242809	9243159	163							chrII	9565970	9566458	231		chrII	13736831	13737216	184		chrIII	1733331	1733791	228		chrII	9242809	9243159	163
chrII	9257956	9258611	265							chrII	9581396	9582156	454		chrII	13737722	13738347	125		chrIII	1742888	1744627	910		chrII	9257956	9258611	265
chrII	9259887	9260362	289							chrII	9586556	9587156	361		chrII	13809728	13810259	250		chrIII	1745559	1746098	314		chrII	9259887	9260362	289
chrII	9261987	9262545	240							chrII	9590889	9591695	325		chrII	13813387	13813951	284		chrIII	1785742	1786287	245		chrII	9261987	9262545	240
chrII	9263744	9264059	171							chrII	9594909	9598867	2653		chrII	13817539	13818763	609		chrIII	1806901	1807769	578		chrII	9263744	9264059	171
chrII	9264629	9265246	370							chrII	9599986	9600577	158		chrII	13819662	13820257	344		chrIII	1818225	1818620	201		chrII	9264629	9265246	370
chrII	9273768	9274579	375							chrII	9600705	9601906	480		chrII	13821165	13821846	424		chrIII	1818955	1819380	205		chrII	9273768	9274579	375
chrII	9281401	9282356	357							chrII	9603245	9603947	329		chrII	13823179	13823691	275		chrIII	1859469	1859989	266		chrII	9281401	9282356	357
chrII	9282563	9286023	333							chrII	9605662	9607580	1653		chrII	13825120	13825656	235		chrIII	1905529	1906065	282		chrII	9282563	9286023	333
chrII	9299659	9299993	195							chrII	9609022	9611798	1335		chrII	13826328	13827452	842		chrIII	1918441	1918887	228		chrII	9299659	9299993	195
chrII	9305515	9305890	187							chrII	9615965	9616482	312		chrII	13829154	13829984	596		chrIII	1920773	1921940	580		chrII	9305515	9305890	187
chrII	9306740	9307245	330							chrII	9616562	9618227	607		chrII	13834168	13834993	330		chrIII	1922337	1924334	1338		chrII	9306740	9307245	330
chrII	9311630	9311968	202							chrII	9619234	9619736	180		chrII	13872350	13872850	260		chrIII	1924649	1925777	671		chrII	9311630	9311968	202
chrII	9315638	9315964	157							chrII	9623987	9624534	273		chrII	13888206	13888673	223		chrIII	1925982	1927064	607		chrII	9315638	9315964	157
chrII	9322891	9323354	226							chrII	9645981	9646475	247		chrII	13903098	13903791	486		chrIII	1950160	1950641	253		chrII	9322891	9323354	226
chrII	9324907	9325331	144							chrII	9668888	9669482	227		chrII	13908476	13908937	267		chrIII	1962130	1962528	205		chrII	9324907	9325331	144
chrII	9343770	9344371	305							chrII	9686678	9687192	332		chrII	13976090	13976505	204		chrIII	2032318	2033147	226		chrII	9343770	9344371	305
chrII	9356625	9357103	242							chrII	9706107	9706570	234		chrII	14018127	14018657	274		chrIII	2100694	2101333	323		chrII	9356625	9357103	242
chrII	9416579	9416985	202							chrII	9713031	9713502	198		chrII	14032528	14033316	269		chrIII	2151422	2151837	226		chrII	9416579	9416985	202
chrII	9431020	9431379	202							chrII	9716514	9717047	262		chrII	14035549	14036153	262		chrIII	2170598	2171017	238		chrII	9431020	9431379	202
chrII	9483289	9483691	185							chrII	9718612	9719126	222		chrII	14036481	14037144	350		chrIII	2171910	2172580	255		chrII	9483289	9483691	185
chrII	9484964	9486498	362							chrII	9731743	9732187	233		chrII	14037564	14038686	334		chrIII	2304808	2305208	226		chrII	9484964	9486498	362
chrII	9487442	9488068	280							chrII	9738608	9739053	283		chrII	14039793	14040964	613		chrIII	2375784	2376302	261		chrII	9487442	9488068	280
chrII	9493120	9493903	398							chrII	9745998	9746434	232		chrII	14042786	14044701	1565		chrIII	2391671	2392090	184		chrII	9493120	9493903	398
chrII	9497288	9497657	160							chrII	9770046	9770486	213		chrII	14045122	14045619	224		chrIII	2401100	2401671	219		chrII	9497288	9497657	160
chrII	9498494	9499094	410							chrII	9774515	9775087	298		chrII	14046321	14046833	257		chrIII	2418134	2418596	211		chrII	9498494	9499094	410
chrII	9500791	9501435	284							chrII	9787366	9788061	200		chrII	14048965	14049471	239		chrIII	2471874	2472245	221		chrII	9500791	9501435	284
chrII	9560789	9561304	186							chrII	9892384	9892743	203		chrII	14050248	14050902	306		chrIII	2528563	2529052	244		chrII	9560789	9561304	186
chrII	9565981	9566390	207							chrII	9937459	9937982	285		chrII	14059624	14060160	284		chrIII	2532651	2533261	299		chrII	9565981	9566390	207
chrII	9576694	9577075	167							chrII	9940342	9940766	216		chrII	14062941	14063437	254		chrIII	2535122	2535643	335		chrII	9576694	9577075	167
chrII	9586781	9587102	169							chrII	9968181	9968687	289		chrII	14143661	14144130	246		chrIII	2552262	2552778	258		chrII	9586781	9587102	169
chrII	9591014	9591419	191							chrII	9974782	9975405	306		chrII	14154233	14154693	227		chrIII	2576654	2577149	254		chrII	9591014	9591419	191
chrII	9600859	9601998	345							chrII	9984624	9985484	340		chrII	14195783	14196257	283		chrIII	2596979	2597497	275		chrII	9600859	9601998	345
chrII	9603208	9604473	358							chrII	10000241	10001432	955		chrII	14234413	14234996	244		chrIII	2768569	2769074	254		chrII	9603208	9604473	358
chrII	9605852	9607006	220							chrII	10004623	10005462	626		chrII	14244275	14244871	285		chrIII	2785774	2786294	253		chrII	9605852	9607006	220
chrII	9607098	9607446	188							chrII	10008853	10009713	304		chrII	14249370	14250655	983		chrIII	2804517	2804842	157		chrII	9607098	9607446	188
chrII	9617232	9618065	660							chrII	10033280	10033972	356		chrII	14251215	14252078	432		chrIII	2805056	2805494	230		chrII	9617232	9618065	660
chrII	9619259	9619841	307							chrII	10034555	10035098	306		chrII	14270282	14270758	264		chrIII	2871729	2872292	223		chrII	9619259	9619841	307
chrII	9620219	9620903	509							chrII	10044904	10045422	267		chrII	14296259	14296651	225		chrIII	2874062	2874602	284		chrII	9620219	9620903	509
chrII	9621098	9622205	192							chrII	10168961	10169728	524		chrII	14301879	14302264	205		chrIII	2875739	2876403	366		chrII	9621098	9622205	192
chrII	9624069	9624442	195							chrII	10174234	10174722	249		chrII	14302694	14303488	216		chrIII	2947190	2947647	248		chrII	9624069	9624442	195
chrII	9631807	9633126	982							chrII	10196981	10197466	245		chrII	14321164	14321475	177		chrIII	2948385	2949010	289		chrII	9631807	9633126	982
chrII	9645943	9646431	282							chrII	10200640	10201168	253		chrII	14349368	14349922	247		chrIII	2966373	2966982	331		chrII	9645943	9646431	282
chrII	9655739	9656558	640							chrII	10248284	10248701	203		chrII	14357844	14358295	223		chrIII	3029835	3030305	269		chrII	9655739	9656558	640
chrII	9667240	9667629	204							chrII	10300867	10301323	222		chrII	14365126	14365610	219		chrIII	3035967	3036337	225		chrII	9667240	9667629	204
chrII	9668896	9669317	222							chrII	10303610	10304088	258		chrII	14383549	14384019	214		chrIII	3037269	3037733	278		chrII	9668896	9669317	222
chrII	9680636	9681007	121							chrII	10304638	10305145	278		chrII	14389950	14390343	225		chrIII	3065743	3066167	186		chrII	9680636	9681007	121
chrII	9681965	9682281	175							chrII	10350353	10350828	247		chrII	14399438	14400046	281		chrIII	3067853	3068335	225		chrII	9681965	9682281	175
chrII	9690124	9690591	233							chrII	10369564	10370120	383		chrII	14404894	14406843	320		chrIII	3139140	3139519	153		chrII	9690124	9690591	233
chrII	9695927	9696373	198							chrII	10370714	10371189	231		chrII	14407138	14408188	856		chrIII	3200420	3200925	265		chrII	9695927	9696373	198
chrII	9706092	9706503	195							chrII	10373453	10373889	198		chrII	14437779	14438293	249		chrIII	3220267	3220783	238		chrII	9706092	9706503	195
chrII	9716569	9716998	234							chrII	10377719	10378259	268		chrII	14441049	14441477	188		chrIII	3271366	3272083	438		chrII	9716569	9716998	234
chrII	9718595	9719865	227							chrII	10382116	10382658	305		chrII	14488522	14489000	236		chrIII	3279148	3279591	229		chrII	9718595	9719865	227
chrII	9727188	9727611	205							chrII	10387905	10388658	274		chrII	14489298	14489743	239		chrIII	3323850	3324321	261		chrII	9727188	9727611	205
chrII	9728434	9728821	179							chrII	10388942	10390915	955		chrII	14495018	14495717	495		chrIII	3404427	3404858	229		chrII	9728434	9728821	179
chrII	9731651	9732151	321							chrII	10395183	10395933	321		chrII	14496645	14497225	262		chrIII	3435109	3435537	233		chrII	9731651	9732151	321
chrII	9746010	9746424	210							chrII	10416218	10416820	377		chrII	14528186	14528681	253		chrIII	3437188	3437615	203		chrII	9746010	9746424	210
chrII	9752231	9752658	206							chrII	10444837	10446118	1022		chrII	14561502	14562096	281		chrIII	3456159	3456674	250		chrII	9752231	9752658	206
chrII	9752906	9753372	235							chrII	10446306	10448096	1167		chrII	14563701	14564150	227		chrIII	3459998	3460506	248		chrII	9752906	9753372	235
chrII	9755381	9755781	154							chrII	10450123	10450914	435		chrII	14569166	14569686	208		chrIII	3470443	3470842	149		chrII	9755381	9755781	154
chrII	9757549	9757991	213							chrII	10495881	10497205	618		chrII	14598173	14598705	264		chrIII	3486074	3486575	222		chrII	9757549	9757991	213
chrII	9760481	9760828	187							chrII	10501359	10501876	298		chrII	14599466	14600282	573		chrIII	3505106	3505612	247		chrII	9760481	9760828	187
chrII	9774202	9774972	622							chrII	10502442	10503137	314		chrII	14641233	14641736	267		chrIII	3531981	3532491	258		chrII	9774202	9774972	622
chrII	9786191	9786568	194							chrII	10504691	10505159	277		chrII	14645187	14645673	220		chrIII	3540368	3540864	267		chrII	9786191	9786568	194
chrII	9787255	9787954	307							chrII	10505780	10506360	282		chrII	14761007	14761353	207		chrIII	3541989	3542509	339		chrII	9787255	9787954	307
chrII	9791113	9791576	249							chrII	10511753	10513811	1196		chrII	14783309	14784351	479		chrIII	3559990	3560674	377		chrII	9791113	9791576	249
chrII	9800192	9800656	237							chrII	10516201	10516822	266		chrII	14794794	14795365	278		chrIII	3562524	3563043	332		chrII	9800192	9800656	237
chrII	9807480	9807929	220							chrII	10524334	10525451	231		chrII	14801017	14801638	351		chrIII	3601213	3601583	154		chrII	9807480	9807929	220
chrII	9891265	9892027	238							chrII	10527405	10528098	329		chrII	14804153	14804875	305		chrIII	3620486	3621234	375		chrII	9891265	9892027	238
chrII	9892359	9892715	208							chrII	10529249	10529790	271		chrII	14814801	14815302	265		chrIII	3630294	3630745	213		chrII	9892359	9892715	208
chrII	9930932	9931330	214							chrII	10533365	10539356	4736		chrII	14818275	14818821	191		chrIII	3650490	3651116	384		chrII	9930932	9931330	214
chrII	9937511	9938039	246							chrII	10541401	10545603	677		chrII	14822311	14822785	245		chrIII	3672728	3673217	251		chrII	9937511	9938039	246
chrII	9940401	9940765	162							chrII	10547268	10550516	1673		chrII	14864150	14864674	281		chrIII	3677232	3677820	285		chrII	9940401	9940765	162
chrII	9968264	9968667	184							chrII	10551786	10552406	273		chrII	14865035	14865493	193		chrIII	3680126	3680558	193		chrII	9968264	9968667	184
chrII	9974158	9974658	191							chrII	10555102	10556308	510		chrII	14938162	14938650	279		chrIII	3681410	3681950	242		chrII	9974158	9974658	191
chrII	9974777	9975396	326							chrII	10557102	10557899	265		chrII	14939213	14939698	106		chrIII	3695359	3695835	241		chrII	9974777	9975396	326
chrII	9984607	9985689	368							chrII	10558324	10560306	656		chrII	14969201	14969664	244		chrIII	3697141	3697828	196		chrII	9984607	9985689	368
chrII	9987002	9987425	280							chrII	10563150	10563988	353		chrII	15010291	15010808	265		chrIII	3735661	3736397	229		chrII	9987002	9987425	280
chrII	9989489	9989839	190							chrII	10566354	10566959	318		chrII	15014177	15014788	331		chrIII	3773152	3773633	240		chrII	9989489	9989839	190
chrII	9992378	9992767	176							chrII	10567132	10570526	1597		chrII	15017021	15017455	245		chrIII	3782825	3783319	284		chrII	9992378	9992767	176
chrII	10010892	10012094	712							chrII	10578808	10579270	200		chrII	15025278	15026165	636		chrIII	3784107	3784946	230		chrII	10010892	10012094	712
chrII	10012470	10012862	184							chrII	10607228	10607907	469		chrII	15042041	15043346	873		chrIII	3786453	3786953	253		chrII	10012470	10012862	184
chrII	10015979	10016422	224							chrII	10658663	10659093	217		chrII	15043655	15044293	344		chrIII	3796996	3798187	347		chrII	10015979	10016422	224
chrII	10019535	10020121	294							chrII	10662622	10663049	201		chrII	15089335	15089840	318		chrIII	3799061	3799583	388		chrII	10019535	10020121	294
chrII	10021680	10022026	146							chrII	10714152	10714629	234		chrII	15119920	15120331	171		chrIII	3801129	3801916	380		chrII	10021680	10022026	146
chrII	10028902	10029484	277							chrII	10737921	10738639	470		chrII	15165786	15166232	202		chrIII	3808861	3809260	252		chrII	10028902	10029484	277
chrII	10033327	10033950	298							chrII	10743437	10743980	294		chrII	15189887	15190385	279		chrIII	3820065	3820494	212		chrII	10033327	10033950	298
chrII	10034526	10035076	324							chrII	10744773	10745226	215		chrII	15193756	15194342	301		chrIII	3852170	3852593	199		chrII	10034526	10035076	324
chrII	10168932	10169733	575							chrII	10783080	10783583	277		chrII	15208051	15208926	606		chrIII	3854815	3855308	246		chrII	10168932	10169733	575
chrII	10174261	10174717	249							chrII	10784939	10785604	316		chrII	15212119	15213024	615		chrIII	3856937	3857424	240		chrII	10174261	10174717	249
chrII	10197034	10197386	189							chrII	10798325	10799199	283		chrII	15213609	15214108	238		chrIII	3862820	3863651	279		chrII	10197034	10197386	189
chrII	10202300	10202602	160							chrII	10819896	10820421	250		chrII	15232599	15233126	266		chrIII	3864047	3864466	222		chrII	10202300	10202602	160
chrII	10248275	10248725	236							chrII	10823894	10824478	299		chrII	15253819	15254189	206		chrIII	3866950	3867819	604		chrII	10248275	10248725	236
chrII	10284699	10285148	219							chrII	10839870	10840485	321		chrII	15255708	15256149	206		chrIII	3875350	3876141	441		chrII	10284699	10285148	219
chrII	10288904	10289327	164							chrII	10850977	10851505	252		chrII	15258576	15259071	229		chrIII	3898640	3899270	357		chrII	10288904	10289327	164
chrII	10294208	10294562	178							chrII	10862005	10863341	942		chrII	15262965	15263386	225		chrIII	3902759	3903082	229		chrII	10294208	10294562	178
chrII	10300270	10300718	241							chrII	10868637	10869190	271		chrIII	25393	26103	341		chrIII	3908156	3908625	248		chrII	10300270	10300718	241
chrII	10303680	10304035	208							chrII	10872402	10873026	268		chrIII	27236	28350	864		chrIII	3921779	3922312	276		chrII	10303680	10304035	208
chrII	10370805	10371133	150							chrII	10925850	10926511	467		chrIII	29524	30861	1044		chrIII	3952039	3952408	150		chrII	10370805	10371133	150
chrII	10373412	10373877	250							chrII	10945439	10945858	192		chrIII	61982	63294	580		chrIII	3953006	3953778	393		chrII	10373412	10373877	250
chrII	10377793	10378171	181							chrII	10950058	10950507	221		chrIII	64035	66328	1712		chrIII	3954077	3955458	303		chrII	10377793	10378171	181
chrII	10382124	10382648	244							chrII	10957410	10957772	204		chrIII	66537	67680	734		chrIII	3955612	3956747	277		chrII	10382124	10382648	244
chrII	10384634	10385008	175							chrII	11013392	11013954	408		chrIII	86275	86685	221		chrIII	3969139	3969629	182		chrII	10384634	10385008	175
chrII	10387963	10389476	1215							chrII	11014353	11015612	1030		chrIII	87123	87642	240		chrIII	3970427	3970763	215		chrII	10387963	10389476	1215
chrII	10389621	10390785	901							chrII	11016592	11017071	294		chrIII	89116	89580	219		chrIII	3978442	3978786	193		chrII	10389621	10390785	901
chrII	10395327	10395726	181							chrII	11021758	11022495	389		chrIII	131644	132048	184		chrIII	3980225	3980672	224		chrII	10395327	10395726	181
chrII	10416337	10416742	248							chrII	11027852	11028325	241		chrIII	188452	188837	197		chrIII	3984043	3984427	207		chrII	10416337	10416742	248
chrII	10444974	10448011	893							chrII	11038267	11039238	542		chrIII	235092	235607	224		chrIII	4004122	4004564	214		chrII	10444974	10448011	893
chrII	10450217	10450758	312							chrII	11041694	11042301	272		chrIII	343477	344585	364		chrIII	4005335	4005889	320		chrII	10450217	10450758	312
chrII	10501534	10501955	215							chrII	11042688	11043503	405		chrIII	348255	350344	1696		chrIII	4017943	4019345	299		chrII	10501534	10501955	215
chrII	10502493	10503098	310							chrII	11049597	11050285	419		chrIII	354371	355889	581		chrIII	4019767	4020207	213		chrII	10502493	10503098	310
chrII	10504665	10505174	302							chrII	11055065	11055465	186		chrIII	360323	360838	227		chrIII	4034982	4035370	191		chrII	10504665	10505174	302
chrII	10515344	10515732	178							chrII	11057355	11058118	490		chrIII	458372	458758	177		chrIII	4063610	4064166	290		chrII	10515344	10515732	178
chrII	10517402	10517688	163							chrII	11097223	11097737	275		chrIII	482756	483122	170		chrIII	4070140	4070689	266		chrII	10517402	10517688	163
chrII	10527560	10527970	209							chrII	11103011	11103430	177		chrIII	490959	491479	291		chrIII	4087495	4088118	278		chrII	10527560	10527970	209
chrII	10537869	10538287	221							chrII	11126244	11126780	308		chrIII	502524	503064	225		chrIII	4099622	4100405	488		chrII	10537869	10538287	221
chrII	10541556	10544202	534							chrII	11132453	11132923	217		chrIII	529739	530319	429		chrIII	4113606	4114024	262		chrII	10541556	10544202	534
chrII	10546059	10546666	375							chrII	11149709	11151376	571		chrIII	535116	536006	234		chrIII	4150806	4151251	199		chrII	10546059	10546666	375
chrII	10547345	10547962	522							chrII	11157539	11158077	274		chrIII	598122	598629	241		chrIII	4193510	4194186	265		chrII	10547345	10547962	522
chrII	10548194	10549648	756							chrII	11166306	11167490	939		chrIII	611969	612340	128		chrIII	4195084	4196102	428		chrII	10548194	10549648	756
chrII	10549819	10551307	380							chrII	11176384	11176749	186		chrIII	612746	613274	303		chrIII	4196615	4196990	190		chrII	10549819	10551307	380
chrII	10551646	10552589	426							chrII	11181188	11181625	129		chrIII	613508	613941	216		chrIII	4223419	4224116	395		chrII	10551646	10552589	426
chrII	10555093	10556233	542							chrII	11184828	11185427	237		chrIII	623663	624243	298		chrIII	4236124	4236586	235		chrII	10555093	10556233	542
chrII	10556367	10557637	1030							chrII	11190105	11191904	231		chrIII	634548	635004	276		chrIII	4237515	4238214	314		chrII	10556367	10557637	1030
chrII	10558307	10560002	705							chrII	11192206	11192940	191		chrIII	640329	640874	269		chrIII	4240976	4241511	222		chrII	10558307	10560002	705
chrII	10563259	10563756	248							chrII	11198143	11198483	218		chrIII	668217	668876	275		chrIII	4269470	4269960	214		chrII	10563259	10563756	248
chrII	10566501	10566858	182							chrII	11223854	11224491	260		chrIII	670824	671547	361		chrIII	4280107	4281221	644		chrII	10566501	10566858	182
chrII	10567237	10567697	276							chrII	11238888	11239337	238		chrIII	675344	675900	335		chrIII	4281743	4282772	437		chrII	10567237	10567697	276
chrII	10569412	10569756	175							chrII	11290278	11290780	239		chrIII	764296	764864	289		chrIII	4283116	4283553	202		chrII	10569412	10569756	175
chrII	10607317	10607870	364							chrII	11293316	11293744	212		chrIII	783223	783697	218		chrIII	4284538	4285119	304		chrII	10607317	10607870	364
chrII	10658672	10659072	208							chrII	11297158	11297634	220		chrIII	793540	794047	267		chrIII	4313428	4313839	177		chrII	10658672	10659072	208
chrII	10704505	10704878	184							chrII	11305538	11306089	215		chrIII	832906	834893	956		chrIII	4323094	4323530	238		chrII	10704505	10704878	184
chrII	10705866	10706448	379							chrII	11316474	11317200	261		chrIII	834991	836356	969		chrIII	4335499	4336036	275		chrII	10705866	10706448	379
chrII	10714194	10714553	172							chrII	11335632	11336117	210		chrIII	843956	844724	244		chrIII	4369253	4369867	273		chrII	10714194	10714553	172
chrII	10743418	10744205	314							chrII	11345383	11345994	362		chrIII	845364	845961	291		chrIII	4378518	4379399	633		chrII	10743418	10744205	314
chrII	10744518	10745315	470							chrII	11347786	11348451	253		chrIII	887642	888900	460		chrIII	4412117	4412519	169		chrII	10744518	10745315	470
chrII	10753660	10753996	203							chrII	11376575	11377061	216		chrIII	981877	982329	288		chrIII	4413929	4414391	201		chrII	10753660	10753996	203
chrII	10755382	10755762	212							chrII	11440098	11440540	201		chrIII	1017312	1020603	2062		chrIII	4419330	4419743	183		chrII	10755382	10755762	212
chrII	10758933	10759328	231							chrII	11452909	11453363	238		chrIII	1037134	1037592	253		chrIII	4426702	4427152	238		chrII	10758933	10759328	231
chrII	10761596	10762026	217							chrII	11463880	11464774	625		chrIII	1080481	1080993	255		chrIII	4452762	4453213	200		chrII	10761596	10762026	217
chrII	10769119	10769560	210							chrII	11473493	11473914	239		chrIII	1122203	1122675	232		chrIII	4456488	4457083	232		chrII	10769119	10769560	210
chrII	10785052	10785420	201							chrII	11484435	11485061	335		chrIII	1131436	1131998	259		chrIII	4470696	4471109	182		chrII	10785052	10785420	201
chrII	10798388	10799285	214							chrII	11534384	11535203	557		chrIII	1136724	1137352	403		chrIII	4475294	4475880	330		chrII	10798388	10799285	214
chrII	10800082	10800584	220							chrII	11545195	11545677	230		chrIII	1142746	1143242	234		chrIII	4491299	4491895	233		chrII	10800082	10800584	220
chrII	10804404	10804811	193							chrII	11547187	11547708	249		chrIII	1202083	1202616	260		chrIII	4494442	4496521	1778		chrII	10804404	10804811	193
chrII	10806335	10806723	185							chrII	11578153	11578683	275		chrIII	1207802	1208225	225		chrIII	4502553	4503862	447		chrII	10806335	10806723	185
chrII	10819964	10820349	181							chrII	11595472	11596770	240		chrIII	1214643	1215007	201		chrIII	4504221	4505441	331		chrII	10819964	10820349	181
chrII	10830244	10830905	303							chrII	11599571	11600106	313		chrIII	1225559	1225943	175		chrIII	4505529	4506857	311		chrII	10830244	10830905	303
chrII	10834214	10834556	142							chrII	11604682	11605524	582		chrIII	1238699	1239047	161		chrIII	4508311	4508722	204		chrII	10834214	10834556	142
chrII	10835208	10836217	686							chrII	11609637	11612617	1904		chrIII	1299957	1300784	520		chrIII	4551855	4552404	240		chrII	10835208	10836217	686
chrII	10840005	10840406	188							chrII	11612763	11614656	1600		chrIII	1301374	1302944	1167		chrIII	4560276	4560978	336		chrII	10840005	10840406	188
chrII	10850973	10851576	277							chrII	11614822	11615778	348		chrIII	1418581	1419305	305		chrIII	4561942	4562531	300		chrII	10850973	10851576	277
chrII	10861721	10863179	595							chrII	11617185	11618165	525		chrIII	1419649	1420644	358		chrIII	4568327	4568936	222		chrII	10861721	10863179	595
chrII	10867179	10867593	195							chrII	11619011	11621146	1108		chrIII	1424277	1424797	275		chrIII	4587119	4587510	189		chrII	10867179	10867593	195
chrII	10868656	10869146	253							chrII	11621474	11622260	252		chrIII	1427981	1428638	308		chrIII	4612533	4613111	337		chrII	10868656	10869146	253
chrII	10872454	10872895	212							chrII	11629730	11630420	393		chrIII	1429889	1430436	256		chrIII	4622360	4622756	169		chrII	10872454	10872895	212
chrII	10877757	10878103	139							chrII	11632487	11633106	391		chrIII	1495807	1496258	220		chrIII	4626406	4626836	212		chrII	10877757	10878103	139
chrII	10887045	10887440	208							chrII	11634027	11641042	270		chrIII	1533038	1533871	256		chrIII	4649142	4649857	334		chrII	10887045	10887440	208
chrII	10925694	10926474	603							chrII	11641705	11642472	424		chrIII	1591564	1592049	261		chrIII	4656215	4657014	359		chrII	10925694	10926474	603
chrII	10946731	10947145	242							chrII	11643064	11644444	1014		chrIII	1601278	1601849	291		chrIII	4658338	4658828	233		chrII	10946731	10947145	242
chrII	10949985	10950472	222							chrII	11646261	11647093	243		chrIII	1616222	1617111	224		chrIII	4666658	4667196	256		chrII	10949985	10950472	222
chrII	10990448	10990805	151							chrII	11648882	11649942	520		chrIII	1618797	1619417	331		chrIII	4689540	4690022	222		chrII	10990448	10990805	151
chrII	10997291	10997590	159							chrII	11652603	11653177	313		chrIII	1622127	1622726	323		chrIII	4693227	4693648	196		chrII	10997291	10997590	159
chrII	11016673	11017186	303							chrII	11675905	11676317	177		chrIII	1634510	1634938	240		chrIII	4720745	4721225	241		chrII	11016673	11017186	303
chrII	11020579	11021018	245							chrII	11694342	11694820	251		chrIII	1680918	1681387	244		chrIII	4721687	4722269	271		chrII	11020579	11021018	245
chrII	11021933	11022362	209							chrII	11695480	11695979	191		chrIII	1682259	1682616	187		chrIII	4723835	4724338	270		chrII	11021933	11022362	209
chrII	11041786	11042236	230							chrII	11705315	11706263	548		chrIII	1731747	1732196	223		chrIII	4731231	4731798	202		chrII	11041786	11042236	230
chrII	11042747	11043438	332							chrII	11713320	11714044	331		chrIII	1733387	1733932	170		chrIII	4749212	4749649	225		chrII	11042747	11043438	332
chrII	11049826	11050248	228							chrII	11719401	11719964	234		chrIII	1742833	1745086	273		chrIII	4752443	4752913	247		chrII	11049826	11050248	228
chrII	11091523	11091895	184							chrII	11720689	11721163	234		chrIII	1745639	1746114	239		chrIII	4754084	4754580	260		chrII	11091523	11091895	184
chrII	11097250	11097680	225							chrII	11722687	11723242	256		chrIII	1785747	1786294	255		chrIII	4756910	4757381	237		chrII	11097250	11097680	225
chrII	11102965	11103440	232							chrII	11723779	11724850	736		chrIII	1787316	1787735	110		chrIII	4796004	4796470	228		chrII	11102965	11103440	232
chrII	11126348	11126769	210							chrII	11728329	11729250	269		chrIII	1791882	1792332	243		chrIII	4849902	4850403	263		chrII	11126348	11126769	210
chrII	11132513	11132813	133							chrII	11732508	11732879	181		chrIII	1806848	1807851	526		chrIII	4899469	4900178	356		chrII	11132513	11132813	133
chrII	11135734	11136128	185							chrII	11736960	11737824	520		chrIII	1818107	1818689	367		chrIII	4930220	4930657	210		chrII	11135734	11136128	185
chrII	11142441	11142850	217							chrII	11739714	11743896	3835		chrIII	1818943	1819361	160		chrIII	4950315	4950773	230		chrII	11142441	11142850	217
chrII	11150837	11151515	231							chrII	11746440	11747411	521		chrIII	1859451	1860013	282		chrIII	4962820	4963343	258		chrII	11150837	11151515	231
chrII	11157625	11158004	170							chrII	11749100	11750325	763		chrIII	1905544	1906054	247		chrIII	4967187	4967605	199		chrII	11157625	11158004	170
chrII	11166278	11166736	252							chrII	11751425	11752161	278		chrIII	1918431	1918862	244		chrIII	4998244	4998700	207		chrII	11166278	11166736	252
chrII	11181122	11181628	242							chrII	11756501	11758268	826		chrIII	1919354	1920025	285		chrIII	5013136	5014440	916		chrII	11181122	11181628	242
chrII	11205752	11206087	186							chrII	11758753	11760053	662		chrIII	1920773	1921937	665		chrIII	5018013	5018506	267		chrII	11205752	11206087	186
chrII	11223904	11224297	196							chrII	11760824	11763525	1085		chrIII	1922239	1922966	447		chrIII	5024319	5024818	220		chrII	11223904	11224297	196
chrII	11238929	11239338	174							chrII	11777903	11778450	292		chrIII	1923075	1924243	576		chrIII	5031252	5031916	387		chrII	11238929	11239338	174
chrII	11261810	11262120	163							chrII	11813819	11814326	220		chrIII	1924779	1925794	518		chrIII	5068768	5069223	226		chrII	11261810	11262120	163
chrII	11290351	11290678	177							chrII	11874565	11875037	230		chrIII	1925994	1927096	599		chrIII	5077166	5077544	178		chrII	11290351	11290678	177
chrII	11305580	11306308	127							chrII	11880430	11881113	270		chrIII	1950144	1950660	248		chrIII	5077914	5078627	352		chrII	11305580	11306308	127
chrII	11316507	11317255	318							chrII	11889322	11889862	225		chrIII	1962203	1962529	132		chrIII	5080629	5081244	277		chrII	11316507	11317255	318
chrII	11329036	11329450	223							chrII	11959073	11959561	254		chrIII	2032374	2033009	422		chrIII	5089420	5089901	230		chrII	11329036	11329450	223
chrII	11335619	11336091	236							chrII	11960552	11960986	198		chrIII	2089466	2089910	187		chrIII	5096652	5097125	235		chrII	11335619	11336091	236
chrII	11345522	11345981	218							chrII	11967436	11967934	260		chrIII	2090727	2091101	182		chrIII	5108702	5109118	237		chrII	11345522	11345981	218
chrII	11347787	11348446	268							chrII	11973632	11975458	1080		chrIII	2100610	2101358	389		chrIII	5165700	5166045	194		chrII	11347787	11348446	268
chrII	11353404	11353764	157							chrII	11979657	11980504	607		chrIII	2151425	2151895	276		chrIII	5172387	5172886	252		chrII	11353404	11353764	157
chrII	11361742	11362047	159							chrII	12006583	12007050	271		chrIII	2170491	2171129	282		chrIII	5201209	5201638	243		chrII	11361742	11362047	159
chrII	11377390	11377956	345							chrII	12023336	12024005	300		chrIII	2171868	2172621	327		chrIII	5202551	5203461	304		chrII	11377390	11377956	345
chrII	11409471	11409861	140							chrII	12024927	12026023	321		chrIII	2331191	2331596	165		chrIII	5210960	5211647	256		chrII	11409471	11409861	140
chrII	11412062	11412416	204							chrII	12036340	12036946	302		chrIII	2375791	2376328	281		chrIII	5227884	5228382	232		chrII	11412062	11412416	204
chrII	11452923	11453369	212							chrII	12040142	12040485	153		chrIII	2391666	2392081	201		chrIII	5274888	5275231	260		chrII	11452923	11453369	212
chrII	11463932	11464800	594							chrII	12041971	12043000	282		chrIII	2401074	2401580	265		chrIII	5280181	5280613	212		chrII	11463932	11464800	594
chrII	11472430	11472885	239							chrII	12059044	12060514	973		chrIII	2418093	2418617	285		chrIII	5305644	5306069	206		chrII	11472430	11472885	239
chrII	11473480	11473879	226							chrII	12062983	12063815	283		chrIII	2471885	2472272	199		chrIII	5308285	5308705	93		chrII	11473480	11473879	226
chrII	11484552	11485002	173							chrII	12067420	12068128	241		chrIII	2528568	2529052	227		chrIII	5349178	5349610	231		chrII	11484552	11485002	173
chrII	11492820	11493307	237							chrII	12089499	12090004	213		chrIII	2532520	2533278	402		chrIII	5372694	5373324	372		chrII	11492820	11493307	237
chrII	11534386	11535171	551							chrII	12101952	12102766	542		chrIII	2535124	2535736	287		chrIII	5421264	5421850	238		chrII	11534386	11535171	551
chrII	11545161	11545752	266							chrII	12107627	12108200	305		chrIII	2552321	2552821	227		chrIII	5449837	5450274	238		chrII	11545161	11545752	266
chrII	11547129	11547652	240							chrII	12184770	12185220	213		chrIII	2553615	2554044	162		chrIII	5464805	5465218	224		chrII	11547129	11547652	240
chrII	11595570	11596767	207							chrII	12208147	12209310	642		chrIII	2576575	2577216	327		chrIII	5472732	5473121	222		chrII	11595570	11596767	207
chrII	11611267	11611829	301							chrII	12222453	12222946	216		chrIII	2578565	2578976	182		chrIII	5498902	5499335	204		chrII	11611267	11611829	301
chrII	11611981	11612327	177							chrII	12338823	12339563	466		chrIII	2596938	2597512	302		chrIII	5501503	5503786	1673		chrII	11611981	11612327	177
chrII	11614154	11614550	287							chrII	12352056	12352562	309		chrIII	2632937	2633383	279		chrIII	5503905	5504728	422		chrII	11614154	11614550	287
chrII	11617574	11618033	254							chrII	12353775	12354128	186		chrIII	2686640	2687006	196		chrIII	5505803	5506705	747		chrII	11617574	11618033	254
chrII	11619070	11619572	243							chrII	12362206	12362628	189		chrIII	2768561	2769211	276		chrIII	5550166	5551373	651		chrII	11619070	11619572	243
chrII	11619724	11620957	313							chrII	12382485	12383072	255		chrIII	2780759	2781217	225		chrIII	5551833	5552627	514		chrII	11619724	11620957	313
chrII	11621537	11621947	213							chrII	12459377	12459800	208		chrIII	2785787	2786306	240		chrIII	5552989	5553454	255		chrII	11621537	11621947	213
chrII	11632577	11633098	292							chrII	12494402	12494947	287		chrIII	2804436	2805528	257		chrIII	5554865	5555317	252		chrII	11632577	11633098	292
chrII	11633950	11636421	1930							chrII	12541493	12542107	325		chrIII	2871717	2872244	255		chrIII	5570817	5571353	336		chrII	11633950	11636421	1930
chrII	11636515	11637865	905							chrII	12659890	12660269	164		chrIII	2874131	2874630	237		chrIII	5591688	5592163	203		chrII	11636515	11637865	905
chrII	11641870	11642636	286							chrII	12671836	12676565	1873		chrIII	2875840	2876399	278		chrIII	5601955	5602426	212		chrII	11641870	11642636	286
chrII	11652653	11653108	245							chrII	12677671	12678862	385		chrIII	2881173	2881643	235		chrIII	5603501	5603951	262		chrII	11652653	11653108	245
chrII	11657073	11657515	196							chrII	12679500	12680261	256		chrIII	2948453	2949030	249		chrIII	5621070	5621687	270		chrII	11657073	11657515	196
chrII	11675911	11676284	154							chrII	12725416	12726081	340		chrIII	2966304	2966990	411		chrIII	5623428	5623849	192		chrII	11675911	11676284	154
chrII	11695432	11695892	183							chrII	12726258	12726985	424		chrIII	3035937	3036399	257		chrIII	5632495	5633013	268		chrII	11695432	11695892	183
chrII	11713415	11713910	236							chrII	12738457	12739176	479		chrIII	3037245	3037753	262		chrIII	5634439	5634959	269		chrII	11713415	11713910	236
chrII	11723810	11724846	699							chrII	12768131	12768798	324		chrIII	3065728	3066164	193		chrIII	5635909	5636350	235		chrII	11723810	11724846	699
chrII	11728359	11729245	247							chrII	12778318	12778691	170		chrIII	3067831	3068347	271		chrIII	5639769	5640318	271		chrII	11728359	11729245	247
chrII	11732539	11732825	107							chrII	12785186	12785641	184		chrIII	3096065	3096480	205		chrIII	5678843	5679368	241		chrII	11732539	11732825	107
chrII	11737235	11737710	227							chrII	12787588	12789029	230		chrIII	3138941	3139548	351		chrIII	5688143	5688667	261		chrII	11737235	11737710	227
chrII	11743200	11743752	302							chrII	12799890	12800349	286		chrIII	3220206	3220823	354		chrIII	5706148	5706667	229		chrII	11743200	11743752	302
chrII	11746537	11747504	415							chrII	12805575	12806119	335		chrIII	3224141	3224515	147		chrIII	5710634	5711140	214		chrII	11746537	11747504	415
chrII	11749088	11750384	774							chrII	12845008	12846058	376		chrIII	3248581	3249352	227		chrIII	5715003	5715992	621		chrII	11749088	11750384	774
chrII	11751430	11752071	273							chrII	12914626	12915071	231		chrIII	3271281	3272132	576		chrIII	5721757	5722240	274		chrII	11751430	11752071	273
chrII	11752751	11753280	147							chrII	12944402	12945162	437		chrIII	3273086	3273493	206		chrIII	5755025	5755753	376		chrII	11752751	11753280	147
chrII	11756673	11757388	176							chrII	12953264	12953699	224		chrIII	3279133	3279572	217		chrIII	5756942	5758148	799		chrII	11756673	11757388	176
chrII	11758815	11759983	615							chrII	12980271	12980625	240		chrIII	3323882	3324339	237		chrIII	5758386	5759152	437		chrII	11758815	11759983	615
chrII	11761248	11762077	602							chrII	12995911	12996612	414		chrIII	3389341	3389948	278		chrIII	5785450	5785950	262		chrII	11761248	11762077	602
chrII	11777949	11778351	215							chrII	13006359	13006890	149		chrIII	3435112	3435501	228		chrIII	5812563	5813182	319		chrII	11777949	11778351	215
chrII	11813862	11814394	237							chrII	13012876	13014407	1096		chrIII	3437142	3437796	242		chrIII	5814773	5815148	220		chrII	11813862	11814394	237
chrII	11836448	11836927	223							chrII	13016202	13016810	329		chrIII	3452828	3453232	171		chrIII	5826901	5827391	236		chrII	11836448	11836927	223
chrII	11838295	11838693	182							chrII	13030621	13031135	263		chrIII	3456137	3456688	270		chrIII	5836201	5836703	226		chrII	11838295	11838693	182
chrII	11839073	11839942	240							chrII	13036592	13037115	223		chrIII	3459986	3460484	247		chrIII	5838103	5839997	784		chrII	11839073	11839942	240
chrII	11841610	11842096	241							chrII	13043301	13044050	350		chrIII	3476221	3476624	233		chrIII	5841250	5842154	575		chrII	11841610	11842096	241
chrII	11852106	11852568	246							chrII	13052014	13052496	188		chrIII	3486014	3486521	261		chrIII	5842468	5843179	496		chrII	11852106	11852568	246
chrII	11874606	11875025	201							chrII	13061938	13062899	355		chrIII	3499859	3500301	171		chrIII	5845116	5846076	521		chrII	11874606	11875025	201
chrII	11880485	11881104	239							chrII	13064947	13065591	358		chrIII	3505108	3505614	254		chrIII	5846423	5846949	179		chrII	11880485	11881104	239
chrII	11960625	11960942	138							chrII	13066756	13067281	312		chrIII	3520386	3520778	245		chrIII	5855702	5856169	215		chrII	11960625	11960942	138
chrII	11967405	11967972	266							chrII	13070081	13072214	1751		chrIII	3531915	3532513	257		chrIII	5871701	5872150	211		chrII	11967405	11967972	266
chrII	11974285	11975330	493							chrII	13072989	13074244	197		chrIII	3533185	3533813	196		chrIII	5874107	5874818	267		chrII	11974285	11975330	493
chrII	11979607	11980483	630							chrII	13083468	13084142	411		chrIII	3540377	3540863	258		chrIII	5875695	5876453	360		chrII	11979607	11980483	630
chrII	12006612	12007054	212							chrII	13117048	13117509	218		chrIII	3542006	3542539	219		chrIII	5876815	5877279	179		chrII	12006612	12007054	212
chrII	12040001	12040544	257							chrII	13156768	13157342	307		chrIII	3542971	3543516	263		chrIII	5919817	5920400	283		chrII	12040001	12040544	257
chrII	12041898	12043063	747							chrII	13187047	13187689	280		chrIII	3560034	3560678	332		chrIII	5921083	5921776	346		chrII	12041898	12043063	747
chrII	12050481	12050962	237							chrII	13199600	13200277	265		chrIII	3562637	3563067	256		chrIII	5922130	5922569	190		chrII	12050481	12050962	237
chrII	12052917	12053846	682							chrII	13237597	13238220	359		chrIII	3587366	3587771	195		chrIII	5925650	5926103	190		chrII	12052917	12053846	682
chrII	12064591	12064979	212							chrII	13278963	13279898	358		chrIII	3601235	3601609	189		chrIII	5930677	5931042	222		chrII	12064591	12064979	212
chrII	12089401	12090081	405							chrII	13291356	13291983	325		chrIII	3620524	3621131	326		chrIII	5937808	5938484	287		chrII	12089401	12090081	405
chrII	12094974	12095386	191							chrII	13304340	13304909	332		chrIII	3622478	3622984	270		chrIII	5938970	5943566	1643		chrII	12094974	12095386	191
chrII	12102126	12102881	383							chrII	13310635	13311453	610		chrIII	3630247	3630716	227		chrIII	5943753	5944214	193		chrII	12102126	12102881	383
chrII	12107722	12108160	222							chrII	13312574	13313728	110		chrIII	3632238	3632750	169		chrIII	5948096	5948735	228		chrII	12107722	12108160	222
chrII	12185628	12186038	198							chrII	13315223	13316238	523		chrIII	3670901	3671357	249		chrIII	5949656	5950230	343		chrII	12185628	12186038	198
chrII	12222404	12222976	304							chrII	13319149	13321806	435		chrIII	3672721	3673202	240		chrIII	5951451	5952103	270		chrII	12222404	12222976	304
chrII	12239410	12239758	171							chrII	13334972	13335740	520		chrIII	3677162	3677875	382		chrIII	5989190	5989653	285		chrII	12239410	12239758	171
chrII	12261090	12261620	152							chrII	13337798	13338342	264		chrIII	3681368	3682000	380		chrIII	5991017	5992625	348		chrII	12261090	12261620	152
chrII	12262520	12262886	180							chrII	13369177	13369631	191		chrIII	3695371	3695863	233		chrIII	5998441	5999029	313		chrII	12262520	12262886	180
chrII	12339056	12339513	243							chrII	13429617	13434528	3999		chrIII	3697173	3697637	185		chrIII	5999191	6000068	618		chrII	12339056	12339513	243
chrII	12372509	12372820	183							chrII	13447580	13448644	224		chrIII	3735657	3736120	241		chrIII	6008959	6009333	144		chrII	12372509	12372820	183
chrII	12378777	12379090	122							chrII	13460480	13461261	311		chrIII	3773094	3773545	271		chrIII	6012890	6013393	352		chrII	12378777	12379090	122
chrII	12380247	12380552	124							chrII	13461466	13462356	619		chrIII	3782825	3783332	286		chrIII	6131883	6132493	354		chrII	12380247	12380552	124
chrII	12382538	12383029	271							chrII	13477060	13477606	305		chrIII	3784020	3784633	217		chrIII	6133355	6133904	264		chrII	12382538	12383029	271
chrII	12459390	12459814	188							chrII	13494590	13495121	276		chrIII	3786396	3786930	331		chrIII	6135160	6135657	212		chrII	12459390	12459814	188
chrII	12494493	12494864	180							chrII	13575380	13575896	275		chrIII	3797012	3797911	307		chrIII	6136719	6137988	853		chrII	12494493	12494864	180
chrII	12499901	12500236	196							chrII	13596523	13596925	203		chrIII	3801080	3801968	451		chrIII	6138458	6138924	268		chrII	12499901	12500236	196
chrII	12615307	12615744	209							chrII	13626885	13627353	280		chrIII	3852170	3852583	161		chrIII	6139139	6139617	265		chrII	12615307	12615744	209
chrII	12622078	12622495	218							chrII	13658286	13658693	237		chrIII	3854803	3855315	261		chrIII	6139820	6140599	233		chrII	12622078	12622495	218
chrII	12622732	12623136	188							chrII	13661838	13662550	271		chrIII	3856941	3857448	254		chrIII	6141426	6141893	286		chrII	12622732	12623136	188
chrII	12625554	12626037	232							chrII	13664101	13664639	323		chrIII	3862787	3863576	304		chrIII	6144415	6144836	169		chrII	12625554	12626037	232
chrII	12659310	12659657	213							chrII	13669537	13670449	358		chrIII	3863692	3864553	595		chrIII	6145198	6146459	281		chrII	12659310	12659657	213
chrII	12659909	12660342	199							chrII	13681031	13681534	226		chrIII	3866945	3867827	594		chrIII	6155781	6156099	145		chrII	12659909	12660342	199
chrII	12661799	12662232	245							chrII	13684148	13685090	614		chrIII	3874779	3875195	224		chrIII	6158525	6159475	235		chrII	12661799	12662232	245
chrII	12664685	12665465	414							chrII	13694554	13695111	291		chrIII	3875457	3876015	317		chrIII	6168818	6169194	257		chrII	12664685	12665465	414
chrII	12665780	12666145	150							chrII	13725640	13726218	241		chrIII	3898703	3899284	367		chrIII	6169599	6170463	616		chrII	12665780	12666145	150
chrII	12668789	12669194	217							chrII	13729984	13730317	191		chrIII	3908149	3908679	246		chrIII	6173002	6173372	143		chrII	12668789	12669194	217
chrII	12671984	12672800	268							chrII	13756151	13756540	187		chrIII	3952025	3952437	196		chrIII	6198554	6198953	207		chrII	12671984	12672800	268
chrII	12677766	12678770	232							chrII	13757319	13757970	275		chrIII	3953074	3953866	324		chrIII	6206132	6206638	267		chrII	12677766	12678770	232
chrII	12679523	12679985	249							chrII	13761088	13763012	1736		chrIII	3954056	3955202	351		chrIII	6215526	6216330	586		chrII	12679523	12679985	249
chrII	12738729	12739127	188							chrII	13780501	13781227	535		chrIII	3955574	3956702	294		chrIII	6278319	6279060	282		chrII	12738729	12739127	188
chrII	12768204	12768747	235							chrII	13817783	13818754	398		chrIII	3969171	3969600	208		chrIII	6279443	6280653	773		chrII	12768204	12768747	235
chrII	12796927	12797749	607							chrII	13819625	13820395	353		chrIII	3970405	3970861	175		chrIII	6297360	6298017	174		chrII	12796927	12797749	607
chrII	12798589	12799183	311							chrII	13820533	13822778	1067		chrIII	3980081	3980750	394		chrIII	6298185	6298550	189		chrII	12798589	12799183	311
chrII	12799948	12800412	241							chrII	13823064	13823834	380		chrIII	3983956	3984531	290		chrIII	6302972	6303757	307		chrII	12799948	12800412	241
chrII	12805567	12806081	290							chrII	13825108	13825757	219		chrIII	3995454	3995794	144		chrIII	6307841	6308269	277		chrII	12805567	12806081	290
chrII	12843670	12844796	254							chrII	13826463	13827393	723		chrIII	4004099	4004598	252		chrIII	6311332	6311746	196		chrII	12843670	12844796	254
chrII	12844878	12846089	683							chrII	13828870	13829952	665		chrIII	4005364	4005861	279		chrIII	6317251	6317702	232		chrII	12844878	12846089	683
chrII	12878575	12879081	284							chrII	13834151	13835137	321		chrIII	4017907	4019367	387		chrIII	6344622	6345141	250		chrII	12878575	12879081	284
chrII	12944470	12945126	418							chrII	13847338	13847791	363		chrIII	4019699	4020264	272		chrIII	6348429	6349076	305		chrII	12944470	12945126	418
chrII	12953332	12953702	164							chrII	13852483	13853235	240		chrIII	4028087	4028534	178		chrIII	6349727	6350829	830		chrII	12953332	12953702	164
chrII	12996096	12996546	229							chrII	13872366	13872811	255		chrIII	4034999	4035404	174		chrIII	6352283	6352876	313		chrII	12996096	12996546	229
chrII	13006096	13006712	321							chrII	13888184	13888665	249		chrIII	4063568	4064190	281		chrIII	6355494	6356333	714		chrII	13006096	13006712	321
chrII	13013746	13014365	240							chrII	13908419	13908979	311		chrIII	4070100	4070668	297		chrIII	6358764	6361829	1504		chrII	13013746	13014365	240
chrII	13016266	13016813	236							chrII	13976087	13976519	198		chrIII	4087531	4088102	254		chrIII	6362215	6362827	303		chrII	13016266	13016813	236
chrII	13030639	13031184	324							chrII	14010822	14011594	456		chrIII	4088447	4088883	244		chrIII	6364211	6364828	319		chrII	13030639	13031184	324
chrII	13061928	13062727	385							chrII	14016222	14018785	2181		chrIII	4099689	4100435	382		chrIII	6374890	6375376	240		chrII	13061928	13062727	385
chrII	13064972	13065616	438							chrII	14027019	14027695	438		chrIII	4113588	4113977	203		chrIII	6396371	6396963	285		chrII	13064972	13065616	438
chrII	13066757	13067226	210							chrII	14028141	14028578	227		chrIII	4119752	4120161	200		chrIII	6401976	6402695	457		chrII	13066757	13067226	210
chrII	13071108	13071617	364							chrII	14029088	14029553	201		chrIII	4132124	4132585	227		chrIII	6405061	6405427	203		chrII	13071108	13071617	364
chrII	13149877	13150266	196							chrII	14030563	14034190	2222		chrIII	4150770	4151285	224		chrIII	6420784	6421621	388		chrII	13149877	13150266	196
chrII	13156875	13157299	220							chrII	14036570	14037132	278		chrIII	4193460	4194580	279		chrIII	6421928	6422366	187		chrII	13156875	13157299	220
chrII	13187063	13187615	211							chrII	14038212	14038617	209		chrIII	4194767	4196190	804		chrIII	6431655	6432140	261		chrII	13187063	13187615	211
chrII	13189321	13189761	232							chrII	14039923	14040856	595		chrIII	4196525	4196995	255		chrIII	6442429	6442929	229		chrII	13189321	13189761	232
chrII	13191662	13192806	382							chrII	14043915	14044678	462		chrIII	4204074	4204490	157		chrIII	6447428	6447939	279		chrII	13191662	13192806	382
chrII	13195052	13195520	200							chrII	14048895	14049582	324		chrIII	4221342	4221833	222		chrIII	6453580	6454028	236		chrII	13195052	13195520	200
chrII	13196726	13197007	102							chrII	14050137	14050931	452		chrIII	4223364	4224225	437		chrIII	6463988	6464617	400		chrII	13196726	13197007	102
chrII	13199614	13200167	211							chrII	14051247	14052361	874		chrIII	4236148	4236666	278		chrIII	6551121	6552154	610		chrII	13199614	13200167	211
chrII	13237669	13238170	288							chrII	14052986	14055563	608		chrIII	4237479	4238221	364		chrIII	6605498	6606574	740		chrII	13237669	13238170	288
chrII	13279236	13279883	122							chrII	14055666	14056425	168		chrIII	4241067	4241496	245		chrIII	6608020	6608485	245		chrII	13279236	13279883	122
chrII	13291231	13291957	438							chrII	14059300	14060214	590		chrIII	4269413	4269977	276		chrIII	6646741	6647206	214		chrII	13291231	13291957	438
chrII	13292854	13293313	215							chrII	14062668	14063598	497		chrIII	4280188	4281202	269		chrIII	6655637	6656183	339		chrII	13292854	13293313	215
chrII	13298350	13298952	267							chrII	14066698	14067196	269		chrIII	4281752	4282813	427		chrIII	6661618	6662020	216		chrII	13298350	13298952	267
chrII	13304536	13304810	104							chrII	14102007	14102403	217		chrIII	4283078	4283501	194		chrIII	6670734	6671133	173		chrII	13304536	13304810	104
chrII	13315555	13316315	234							chrII	14141965	14142573	212		chrIII	4284543	4285174	288		chrIII	6690395	6690819	191		chrII	13315555	13316315	234
chrII	13319321	13320015	181							chrII	14143681	14144130	247		chrIII	4313377	4313823	182		chrIII	6695026	6695693	278		chrII	13319321	13320015	181
chrII	13335010	13335711	339							chrII	14154271	14154682	201		chrIII	4323165	4323558	180		chrIII	6709924	6710362	210		chrII	13335010	13335711	339
chrII	13356650	13357058	182							chrII	14160119	14160480	167		chrIII	4335522	4336000	200		chrIII	6797861	6798450	362		chrII	13356650	13357058	182
chrII	13369184	13369524	184							chrII	14161182	14161480	157		chrIII	4369218	4369921	318		chrIII	6857348	6857822	245		chrII	13369184	13369524	184
chrII	13447546	13448350	250							chrII	14210730	14211451	441		chrIII	4378531	4379383	529		chrIII	6870944	6872922	839		chrII	13447546	13448350	250
chrII	13460582	13461434	230							chrII	14216750	14217979	854		chrIII	4412112	4412547	164		chrIII	6873553	6874173	350		chrII	13460582	13461434	230
chrII	13461510	13462518	639							chrII	14219378	14220010	434		chrIII	4413863	4414435	306		chrIII	6887484	6887942	218		chrII	13461510	13462518	639
chrII	13465135	13466055	357							chrII	14233553	14234996	487		chrIII	4426705	4427162	240		chrIII	6888363	6888859	213		chrII	13465135	13466055	357
chrII	13467825	13468201	230							chrII	14244349	14244795	211		chrIII	4452715	4453059	188		chrIII	6895054	6895572	287		chrII	13467825	13468201	230
chrII	13469039	13469897	281							chrII	14250001	14250613	343		chrIII	4456462	4457142	336		chrIII	6897454	6898058	281		chrII	13469039	13469897	281
chrII	13475269	13475647	209							chrII	14251241	14252233	540		chrIII	4460239	4460595	179		chrIII	6898405	6898977	283		chrII	13475269	13475647	209
chrII	13477133	13477473	196							chrII	14254326	14257304	851		chrIII	4470695	4471095	207		chrIII	6903124	6903605	234		chrII	13477133	13477473	196
chrII	13575432	13575897	207							chrII	14262487	14263094	387		chrIII	4475353	4475915	288		chrIII	6971767	6972302	277		chrII	13575432	13575897	207
chrII	13596550	13596886	132							chrII	14321186	14321530	216		chrIII	4491259	4491833	326		chrIII	6978745	6979340	325		chrII	13596550	13596886	132
chrII	13609585	13609987	196							chrII	14349423	14349802	186		chrIII	4494257	4496497	2007		chrIII	6981959	6982427	236		chrII	13609585	13609987	196
chrII	13638428	13639025	257							chrII	14357826	14358239	226		chrIII	4497667	4498241	282		chrIII	6985039	6985399	175		chrII	13638428	13639025	257
chrII	13640062	13640558	274							chrII	14383516	14383968	235		chrIII	4502573	4503906	959		chrIII	6987949	6988485	262		chrII	13640062	13640558	274
chrII	13664254	13664751	250							chrII	14389917	14390422	206		chrIII	4504158	4506965	390		chrIII	7021214	7021607	213		chrII	13664254	13664751	250
chrII	13665190	13665595	222							chrII	14399461	14400011	245		chrIII	4508276	4508770	259		chrIII	7030353	7030765	207		chrII	13665190	13665595	222
chrII	13668792	13669304	221							chrII	14405089	14406248	185		chrIII	4513896	4514454	233		chrIII	7073901	7074326	203		chrII	13668792	13669304	221
chrII	13669636	13670033	147							chrII	14437878	14438371	228		chrIII	4551903	4552460	206		chrIII	7087817	7088298	247		chrII	13669636	13670033	147
chrII	13673553	13674310	408							chrII	14441061	14441489	200		chrIII	4555391	4555760	216		chrIII	7114893	7115274	229		chrII	13673553	13674310	408
chrII	13678255	13679107	585							chrII	14474560	14475029	272		chrIII	4560306	4561011	289		chrIII	7116256	7116950	484		chrII	13678255	13679107	585
chrII	13679709	13680267	323							chrII	14488520	14489006	218		chrIII	4562008	4562526	239		chrIII	7120439	7120846	193		chrII	13679709	13680267	323
chrII	13680956	13681433	232							chrII	14489365	14489839	209		chrIII	4568341	4568956	331		chrIII	7153715	7154273	225		chrII	13680956	13681433	232
chrII	13737692	13738069	196							chrII	14496744	14497230	236		chrIII	4587129	4587534	180		chrIII	7154495	7154977	291		chrII	13737692	13738069	196
chrII	13751020	13751534	246							chrII	14528215	14528752	242		chrIII	4612428	4613058	375		chrIII	7155190	7156129	580		chrII	13751020	13751534	246
chrII	13756115	13756480	209							chrII	14561504	14562099	278		chrIII	4622244	4622823	265		chrIII	7162214	7162712	245		chrII	13756115	13756480	209
chrII	13788812	13789156	175							chrII	14563657	14564126	226		chrIII	4626409	4626853	256		chrIII	7165706	7166198	237		chrII	13788812	13789156	175
chrII	13813388	13813817	204							chrII	14597755	14598680	688		chrIII	4649134	4649914	320		chrIII	7166565	7167174	230		chrII	13813388	13813817	204
chrII	13817849	13818352	289							chrII	14599601	14600347	473		chrIII	4656206	4657036	398		chrIII	7179539	7180044	252		chrII	13817849	13818352	289
chrII	13819741	13820186	247							chrII	14616818	14617201	172		chrIII	4657445	4657746	97		chrIII	7189648	7190073	225		chrII	13819741	13820186	247
chrII	13821327	13822014	320							chrII	14635064	14636263	274		chrIII	4658284	4658891	290		chrIII	7199403	7199922	267		chrII	13821327	13822014	320
chrII	13823217	13823627	191							chrII	14641169	14641792	409		chrIII	4666662	4667207	280		chrIII	7207784	7208270	249		chrII	13823217	13823627	191
chrII	13825030	13825532	259							chrII	14645016	14645700	472		chrIII	4687079	4687513	237		chrIII	7216963	7217505	282		chrII	13825030	13825532	259
chrII	13826982	13827726	186							chrII	14650997	14652186	821		chrIII	4720732	4721215	248		chrIII	7234113	7234524	189		chrII	13826982	13827726	186
chrII	13829094	13830070	582							chrII	14754077	14754528	252		chrIII	4721614	4722341	341		chrIII	7271072	7271427	162		chrII	13829094	13830070	582
chrII	13834218	13834972	277							chrII	14762452	14762792	150		chrIII	4723826	4724402	206		chrIII	7272005	7272499	220		chrII	13834218	13834972	277
chrII	13835816	13836143	142							chrII	14794759	14795361	315		chrIII	4731215	4731706	223		chrIII	7272688	7273362	309		chrII	13835816	13836143	142
chrII	13852600	13853050	197							chrII	14797931	14798574	319		chrIII	4749217	4749659	220		chrIII	7277152	7277570	216		chrII	13852600	13853050	197
chrII	13872301	13872824	312							chrII	14801038	14801578	303		chrIII	4752476	4752878	207		chrIII	7278415	7278767	185		chrII	13872301	13872824	312
chrII	13888192	13888615	222							chrII	14804163	14804959	238		chrIII	4754064	4754603	261		chrIII	7292440	7292895	243		chrII	13888192	13888615	222
chrII	13903271	13903744	302							chrII	14810519	14810930	210		chrIII	4756885	4757395	256		chrIII	7296073	7297762	1199		chrII	13903271	13903744	302
chrII	13907267	13907605	186							chrII	14814815	14815247	255		chrIII	4795955	4796464	249		chrIII	7299337	7299760	218		chrII	13907267	13907605	186
chrII	13908521	13908878	178							chrII	14822292	14822717	220		chrIII	4899300	4900191	552		chrIII	7299974	7301172	271		chrII	13908521	13908878	178
chrII	13933319	13933661	146							chrII	14851406	14851842	234		chrIII	4947293	4947663	142		chrIII	7304811	7305955	670		chrII	13933319	13933661	146
chrII	13976124	13976467	161							chrII	14856801	14857284	238		chrIII	4950186	4950809	355		chrIII	7335082	7335712	255		chrII	13976124	13976467	161
chrII	13985519	13986635	228							chrII	14953413	14954691	268		chrIII	4962787	4963666	280		chrIII	7336041	7336592	269		chrII	13985519	13986635	228
chrII	14018097	14018630	304							chrII	14969159	14969658	260		chrIII	4967190	4967564	182		chrIII	7358581	7359392	168		chrII	14018097	14018630	304
chrII	14032666	14033175	221							chrII	15010335	15010784	244		chrIII	5013095	5014505	995		chrIII	7376006	7376885	551		chrII	14032666	14033175	221
chrII	14035749	14036120	209							chrII	15025587	15026138	305		chrIII	5017973	5018567	309		chrIII	7387210	7387832	245		chrII	14035749	14036120	209
chrII	14036586	14037152	255							chrII	15089334	15089992	210		chrIII	5024301	5024880	301		chrIII	7444339	7445560	318		chrII	14036586	14037152	255
chrII	14037640	14038156	173							chrII	15119609	15120300	527		chrIII	5025008	5025599	281		chrIII	7465262	7465695	236		chrII	14037640	14038156	173
chrII	14039819	14040885	548							chrII	15165800	15166269	202		chrIII	5031222	5031892	347		chrIII	7498231	7498797	283		chrII	14039819	14040885	548
chrII	14042763	14043563	225							chrII	15173094	15173476	207		chrIII	5047169	5047533	247		chrIII	7499370	7499822	218		chrII	14042763	14043563	225
chrII	14043762	14044749	592							chrII	15178682	15179120	204		chrIII	5068738	5069224	246		chrIII	7520557	7521032	230		chrII	14043762	14044749	592
chrII	14048913	14049538	305							chrII	15184643	15185840	963		chrIII	5077113	5077580	223		chrIII	7534484	7534986	243		chrII	14048913	14049538	305
chrII	14050208	14050851	315							chrII	15186076	15187508	386		chrIII	5077960	5078551	295		chrIII	7548902	7549234	169		chrII	14050208	14050851	315
chrII	14059622	14060143	286							chrII	15187650	15188284	256		chrIII	5080605	5081391	391		chrIII	7554440	7555175	512		chrII	14059622	14060143	286
chrII	14062800	14063442	412							chrII	15189476	15191471	723		chrIII	5089463	5089878	233		chrIII	7570084	7570686	347		chrII	14062800	14063442	412
chrII	14102092	14102443	144							chrII	15232602	15233178	249		chrIII	5096626	5097114	230		chrIII	7572806	7573222	223		chrII	14102092	14102443	144
chrII	14142102	14142541	207							chrII	15244356	15245453	199		chrIII	5102458	5102999	366		chrIII	7580452	7581039	323		chrII	14142102	14142541	207
chrII	14154236	14154676	236							chrII	15246389	15247699	777		chrIII	5108660	5109120	217		chrIII	7642972	7643409	204		chrII	14154236	14154676	236
chrII	14195771	14196235	290							chrII	15249556	15250449	182		chrIII	5172375	5172922	271		chrIII	7644147	7644613	219		chrII	14195771	14196235	290
chrII	14244307	14244920	224							chrII	15255727	15256163	194		chrIII	5190205	5191001	609		chrIII	7659294	7659763	224		chrII	14244307	14244920	224
chrII	14249463	14250686	870							chrII	15258651	15259073	199		chrIII	5201038	5201754	383		chrIII	7676755	7677150	193		chrII	14249463	14250686	870
chrII	14251226	14252029	364							chrII	15262990	15263377	213		chrIII	5202557	5203339	273		chrIII	7682310	7682786	215		chrII	14251226	14252029	364
chrII	14270347	14270675	174							chrII	15275815	15277589	732		chrIII	5211036	5211612	298		chrIII	7709964	7710508	288		chrII	14270347	14270675	174
[truncated: 4,715 more rows]
